# Supplementary material for: Epidemiology of psoriasis and palmoplantar pustulosis: a nationwide study using the Japanese national claims database
Source: PubMed Central journal article supplement — BMJ Open. 2015 Jan 14;5(1):e006450. doi: 10.1136/bmjopen-2014-006450 (PMC4298108; doi:10.1136/bmjopen-2014-006450), 2015-01-14
Supplement: bmjopen-2014-006450.draft_revisions.pdf [file bmjopen-2014-006450.draft_revisions.pdf]

# BMJ Open

## Epidemiology of psoriasis and palmoplantar pustulosis: a nationwide study using the Japanese national claims database

|                                    |                                                                                                                                                                                                                                                                                                                                                                                                                                                                                                                                                                                                           |
|------------------------------------|-----------------------------------------------------------------------------------------------------------------------------------------------------------------------------------------------------------------------------------------------------------------------------------------------------------------------------------------------------------------------------------------------------------------------------------------------------------------------------------------------------------------------------------------------------------------------------------------------------------|
| Journal:                           | <i>BMJ Open</i>                                                                                                                                                                                                                                                                                                                                                                                                                                                                                                                                                                                           |
| Manuscript ID:                     | bmjopen-2014-006450                                                                                                                                                                                                                                                                                                                                                                                                                                                                                                                                                                                       |
| Article Type:                      | Research                                                                                                                                                                                                                                                                                                                                                                                                                                                                                                                                                                                                  |
| Date Submitted by the Author:      | 23-Aug-2014                                                                                                                                                                                                                                                                                                                                                                                                                                                                                                                                                                                               |
| Complete List of Authors:          | Kubota, Kiyoshi; NPO Drug Safety Research Unit Japan, N/A<br>Kamijima, Yukari; NPO Drug Safety Research Unit Japan,<br>Sato, Tsugumichi; Tokyo University of Science, Faculty of Pharmaceutical<br>Sciences<br>Ooba, Nobuhiro; The Nihon University School of Pharmacy, Department of<br>Clinical Pharmacy<br>Koide, Daisuke; Graduate School of Medicine, University of Tokyo,<br>Department of Clinical Epidemiology and Systems<br>Iizuka, Hajime; Asahikawa Medical University, Department of Dermatology<br>Nakagawa, Hidemi; The Jikei University, School of Medicine, Department of<br>Dermatology |
| <b>Primary Subject<br>Heading</b>: | Epidemiology                                                                                                                                                                                                                                                                                                                                                                                                                                                                                                                                                                                              |
| Secondary Subject Heading:         | Dermatology                                                                                                                                                                                                                                                                                                                                                                                                                                                                                                                                                                                               |
| Keywords:                          | Psoriasis < DERMATOLOGY, palmoplantar pustulosis, database,<br>Epidemiology < TROPICAL MEDICINE, Japan                                                                                                                                                                                                                                                                                                                                                                                                                                                                                                    |
|                                    |                                                                                                                                                                                                                                                                                                                                                                                                                                                                                                                                                                                                           |

SCHOLARONE™  
Manuscripts

1  
2  
3  
4  
5  
6 Epidemiology of psoriasis and palmoplantar pustulosis: a nationwide study using the  
7 Japanese national claims database  
8  
9

10  
11 Kiyoshi Kubota<sup>1,2</sup>, Yukari Kamijima<sup>1,2</sup>, Tsugumichi Sato<sup>1,3</sup>, Nobuhiro Ooba<sup>1,4</sup>, Daisuke  
12 Koide<sup>5</sup>, Hajime Iizuka<sup>6</sup> and Hidemi Nakagawa<sup>7</sup>  
13  
14

15  
16  
17 1 Department of Pharmacoepidemiology, Graduate School of Medicine, University of  
18 Tokyo, Japan.  
19

20 2 NPO Drug Safety Research Unit Japan, Tokyo, Japan

21 3 Faculty of Pharmaceutical Sciences, Tokyo University of Science, Chiba, Japan

22 4 Department of Clinical Pharmacy, The Nihon University School of Pharmacy, Chiba,  
23 Japan.  
24  
25

26  
27 5 Department of Clinical Epidemiology and Systems, Graduate School of Medicine,  
28 University of Tokyo, Tokyo, Japan.  
29

30 6 Department of Dermatology, Asahikawa Medical University, Hokkaido, Japan

31 7 Department of Dermatology, The Jikei University, School of Medicine, Tokyo, Japan.  
32  
33  
34  
35

36 All correspondence should be addressed to:

37 Kiyoshi Kubota, MD PhD

38 NPO Drug Safety Research Unit Japan, Tokyo, Japan

39 1-2-13-4F Yushima, Bunkyo-ku, Tokyo 113-0034, Japan

40 Telephone:+81-3-5297-5860

41 Fax: +81-3-5297-5890

42 e-mail: [kubotape-tky@umin.net](mailto:kubotape-tky@umin.net)  
43  
44  
45  
46  
47  
48  
49

50 Key words : psoriasis; palmoplantar pustulosis; database; epidemiology; Japan  
51  
52

53 Word Count:3528  
54  
55  
56  
57  
58  
59  
60

## ABSTRACT

**Objective:** The primary objective is to estimate the national prevalence of psoriasis and PPP. Secondary objectives are to know (1) whether the disease activity of psoriasis and PPP varies seasonally, and (2) whether the disease severity is associated with concurrent diabetes mellitus, hyperlipidemia and hypertension.

**Settings:** Patients with a diagnosis code of psoriasis or PPP in a claim issued by any medical institution were identified using Japanese national database between April 2010 and March 2011.

**Participants:** A total of 565,903 patients with psoriasis or PPP were identified. No patient was excluded.

**Primary and Secondary Outcome Measures:** The national prevalence was calculated using the census data. We estimated the difference of proportion of patients who used healthcare service, as a proxy of disease activity, between hot and cold seasons and that of standardized prevalence of comorbidities between severe and mild diseases. The measures were finally estimated in two diseases separately but not in all patients as planned because two diseases were found different for major aspects.

**Results:** The national prevalence of psoriasis and PPP was 0.34% (95% CI 0.34 to 0.34%) and 0.12% (0.12 to 0.12%), respectively. The difference of the proportion of patients who used healthcare service in the hottest and coldest seasons was -0.3% (-0.5 to -0.1%) for psoriasis and 10.0% (9.8 to 10.3%) for PPP. The difference of the standardized prevalence between severe and mild psoriasis was 3.1% (2.7 to 3.4%), 3.2% (2.8 to 3.6%) and 5.1% (4.7 to 5.6%) for concurrent diabetes mellitus, hyperlipidemia and hypertension, respectively. No significant difference of the prevalence of comorbidity was observed for PPP.

(2)

1  
2  
3  
4  
5  
6 **Conclusions:** The national prevalence, seasonal variation of disease activity and  
7  
8 prevalence of comorbidities in Japanese patients with psoriasis and PPP estimated in  
9  
10 this descriptive study may be used as the basic information in the future studies.  
11  
12  
13  
14  
15  
16  
17  
18  
19  
20  
21  
22

### 23 **Strengths and limitations of this study**

- 24  
25 - This study estimated the national prevalence of psoriasis and palmoplantar pustulosis  
26  
27 (PPP) using the national database covering more than 90% of the whole Japanese  
28  
29 population.  
30  
31  
32 - The seasonal variation of the use of the healthcare service, as a proxy of disease  
33  
34 activity, treatments for psoriasis and PPP and the prevalence of concurrent diabetes  
35  
36 mellitus, hyperlipidemia and hypertension are also examined.  
37  
38 - The main limitation of the current study is that the diagnosis codes of psoriasis and  
39  
40 PPP are not validated.  
41  
42  
43 - To address the concern for possible misclassification of psoriasis and PPP by the  
44  
45 non-specialist, results in the subgroups divided by the specialty of the department that  
46  
47 provided the healthcare service are shown in online supplementary tables.  
48  
49  
50  
51  
52  
53  
54  
55  
56  
57  
58  
59  
60

## INTRODUCTION

Psoriasis is a chronic immune-mediated disease affecting 2-4% of population in the US and Europe ,[1-3]. However, according to the recent epidemiological studies, the prevalence of psoriasis in Asian countries is lower than that in the Western countries ,[4,5]. Palmoplantar pustulosis (PPP), first described as a variant of pustular psoriasis ,[6], has been regarded as a rare disease in the Western countries ,[7] but its prevalence in Asia is not known.

Databases including claims databases have been sometimes used to study epidemiology of diseases including psoriasis ,[1,4]. Japanese universal multi-payer health-care system covering virtually all citizens was started already in 1961 but it was only recently that the Japanese national database of health insurance claims (JNDB) was created by the Ministry of Health, Labour and Welfare. The JNDB has accumulated data of all claims in electronic format issued in April 2009 or later. Since 2011, the JNDB was made available on a trial basis for the research and other secondary purposes. In the current study, we used the JNDB data to estimate the national prevalence and some of relevant epidemiological characteristics of psoriasis and PPP in Japanese population.

## MATERIALS AND METHODS

### Acquisition of claims data

All the patients with diagnosis codes of psoriasis and PPP in outpatient or inpatient claims issued in electronic format between April 2010 and March 2011 were identified. The proportion of claims in electronic format was 97.9 and 99.6 % for claims issued from hospitals, 76.0 and 91.2% for those from clinics and 99.9 and 99.9% for those from community pharmacies in April 2010 and in March 2011, respectively. For claims from clinics, 89.5% were in electronic format already in August 2010 [8]. We selected all of the standardized domestic diagnosis codes mapped to L400 to L409 of the 10th revision of the International Statistical Classification of Diseases (ICD-10) in the master table of diagnosis codes for claims in electronic format maintained by the Medical Information System Development Center, Tokyo, Japan. In the provided data, a pair of two kinds of identifiers (defined as ID1 and ID2) was given to all the claims of each patient. Those identifiers were newly created in the JNDB because the social security number or other unique identifier is not used in Japanese healthcare system. Of these two, ID1 was generated by encrypting the combination of health card number given by each insurer, date of birth and sex and ID2 was generated by encrypting the combination of name, date of birth and sex. The former (ID1) may be useful to identify the subject when the patient's family name is changed (e.g., from the maiden to married name) while the latter (ID2) may be useful to identify the patient when the subject becomes insured by a different insurer (e.g., due to job change). Regarding the demographic data, sex and age group of 5-year interval (0-4, 5-9, ..., 80-84, and 85 years of age or older) were provided. We obtained diagnosis codes of concurrent diabetes mellitus, hyperlipidemia and hypertension and codes of drugs to treat those 3 comorbidities as well as drugs and

1  
2  
3  
4  
5  
6 phototherapy for the treatment of psoriasis and PPP. In Japanese health insurance  
7  
8 system, for patients who used the healthcare service, one outpatient claim and/or one  
9  
10 inpatient claim from one hospital or clinic are issued for one patient in each month.  
11  
12 Similarly, one claim from one community pharmacy is issued for one patient in each  
13  
14 month. We obtained the information of year and month of the claims issued for the  
15  
16 study subjects together with codes of diagnoses and treatments used in the study. We  
17  
18 have also collected the specialty of the department in a claim with a diagnosis code of  
19  
20 psoriasis and PPP issued from a hospital or clinic though this information is not a  
21  
22 required condition for the reimbursement and often not available.  
23  
24

25  
26 The study was approved by the ethics committee of the Graduate School and Faculty  
27  
28 of Medicine, University of Tokyo in October 2011 (No. 3586).  
29  
30

### 31 32 **Statistical Analysis**

33  
34 The prevalence of psoriasis and PPP in the nation were estimated by the counts of  
35  
36 patients with a diagnosis code of psoriasis and PPP divided by the population size in the  
37  
38 census as of October 2010. The normal approximation confidence interval (CI) of the  
39  
40 prevalence was also estimated. A total of 21 local diagnosis codes were classified into  
41  
42 the following 8 disease subclasses: (1) plaque psoriasis (“psoriasis vulgaris” (L400),  
43  
44 “psoriasis” (L409), “psoriasis vulgaris of entire body” (L400), “psoriasis of extremities”  
45  
46 (L400), “psoriasis vulgaris of extremities” (L400), “psoriasis vulgaris of lower back”  
47  
48 (L400) and “plaque psoriasis” (L400)), (2) scalp psoriasis (“seborrheic psoriasis” (L400)  
49  
50 and “psoriasis vulgaris of scalp” (L400)), (3) guttate psoriasis (L404), (4) psoriatic  
51  
52 arthritis (“psoriatic arthritis” (L405), “psoriatic arthritis mutilans” (L405) and “psoriatic  
53  
54 spondylitis” (L405)), (5) pustular psoriasis (“pustular psoriasis” (L401), “impetigo  
55  
56  
57  
58  
59  
60

(6)

1  
2  
3  
4  
5  
6 herpetiformis” (L401), “acrodermatitis continua” (L402), “generalized pustular psoriasis”  
7  
8 (L401) and “acute generalized pustular psoriasis” (L401), (6) erythrodermic psoriasis  
9  
10 (L408), (7) PPP (L403) and (8) pustulotic arthro-osteitis (PAO) (L403). Patients were  
11  
12 further broadly classified into “patients with PPP” when they had a diagnosis code of  
13  
14 PPP or PAO but no other diagnosis code. Otherwise, patients were classified into  
15  
16 “patients with psoriasis”. These two broad disease categories were used on an ad hoc  
17  
18 basis because the number of patients with PPP was much larger than expected and  
19  
20 patients under two disease categories were found to be different for several important  
21  
22 aspects. When the average age was calculated, we used the midpoint of the 5-year  
23  
24 interval (e.g., 37 years old for age group 35-39).  
25  
26

27  
28 To estimate the seasonal variation of the use of the healthcare service for psoriasis  
29  
30 and PPP, as a proxy for disease activity, we counted the number of patients in each  
31  
32 month during the 12-month observation period for whom an outpatient or inpatient  
33  
34 claim with a diagnosis code of psoriasis or PPP was issued. Patients were then divided  
35  
36 into 4 groups according to the combination of two dummy variables, X and Y, where the  
37  
38 values were assigned as follows: X=1 if the patient used the healthcare service for  
39  
40 psoriasis or PPP in the hottest season (July or August of 2010) while X=0 otherwise, and,  
41  
42 Y=1 if the patient used the service in the coldest season (January or February of 2011)  
43  
44 while Y=0 otherwise. We estimated the difference (and its 95% confidence interval)  
45  
46 between the mean of X (the proportion of patients who used the service in the hottest  
47  
48 season) and the mean of Y (the proportion of patients who used the service in the coldest  
49  
50 season) and the difference was tested by the paired t-test.  
51  
52

53  
54 Treatments for psoriasis and PPP were classified as systemic therapy (adalimumab,  
55  
56 infliximab, ustekinumab, methotrexate, ciclosporin and etretinate), phototherapy and  
57  
58

59  
60 (7)



1  
2  
3  
4  
5  
6  
7  
8  
9  
10  
11  
12  
13  
14  
15  
16  
17  
18  
19  
20  
21  
22  
23  
24  
25  
26  
27  
28  
29  
30  
31  
32  
33  
34  
35  
36  
37  
38  
39  
40  
41  
42  
43  
44  
45  
46  
47  
48  
49  
50  
51  
52  
53  
54  
55  
56  
57  
58  
59  
60

topical therapy (topical vitamin D and topical corticosteroid). To know the distribution of treatments for psoriasis and PPP, one patient was counted once for each treatment and the proportion of males and the average age were calculated for each treatment group. In addition, for each therapy, the proportion of patients with psoriatic arthropathy in the broad category of psoriasis and that with PAO in the broad category of PPP was calculated to know which treatment was preferred for patients with arthropathy.

To examine whether the concurrent diabetes mellitus, hyperlipidemia and hypertension are more frequent in the patients with severe psoriasis and PPP, the treatment for psoriasis and PPP was used as a surrogate of the severity of psoriasis and PPP. Patients were subdivided into the following severity classes I to IV: patients with one or more of systemic therapies (Class I), patients with phototherapy but no systemic therapy (Class II), patients with topical therapy only (Class III) and patients with no treatment for psoriasis or PPP (Class IV). Patients were defined to have diabetes mellitus when they had a diagnosis code of diabetes mellitus at least in one claim as well as codes of anti-diabetic drugs in claims issued in two or more different months during the 12-month observation period. Similarly, patients were defined to have hyperlipidemia and hypertension, respectively, when they had a diagnosis code of the disease at least in one claim as well as codes of drugs to treat the disease (i.e., lipid-lowering drugs and anti-hypertensive drugs, respectively) in claims issued in two or more months. The prevalence of diabetes mellitus, hyperlipidemia and hypertension in each severity class of psoriasis and PPP was standardized to the distribution of age and sex in the entire study population. The difference of the standardized prevalence and its 95% CI were estimated using the severity class III as a

1  
2  
3  
4  
5  
6 reference ,[9].  
7

8 To assess who provided the healthcare service, we obtained the specialty of the  
9 department specified in a claim with a diagnosis code of psoriasis and PPP. Patients  
10 were subdivided into the following 3 department subgroups: (A) “patients of  
11 dermatology or rheumatology” when the department was specified as either of  
12 dermatology and rheumatology at least in one claim with a diagnosis code of psoriasis or  
13 PPP, (B) “patients of other specialty” when the department was specified as other  
14 specialty at least in one claim but not as dermatology or rheumatology in any claim and  
15 (C) “patients of the department not specified” when the department was not specified in  
16 any claim. Demographic and other characteristics of patients with psoriasis and PPP  
17 examined in each of 3 department subgroups were shown in online supplementary  
18 tables.  
19  
20  
21  
22  
23  
24  
25  
26  
27  
28  
29  
30

31 All the statistical analyses were conducted by SAS (Version. 9.3, SAS Institute Inc.  
32 Cry, NC).  
33  
34  
35  
36  
37  
38  
39  
40  
41  
42  
43  
44  
45  
46  
47  
48  
49  
50  
51  
52  
53  
54  
55  
56  
57  
58  
59  
60

## RESULTS

### Prevalence and demographic characteristics of psoriasis and PPP

We identified 565,903 patients with psoriasis or PPP from a total of 681,827 ID1s and 778,767 ID2s assuming that all the pairs of ID1 and ID2 represented the same patient when ID1 or ID2 of the pairs was identical. Using the size of the total population (128 million) in the census data as of October 2010, a total number of 565,903 accounted for 0.44% (95% CI 0.44 to 0.44%) of the prevalence in the nation. The 565,903 patients were broadly classified into 429,679 patients with psoriasis (the national prevalence=0.34%, 95% CI 0.34 to 0.34%) and 136,224 patients with PPP. Because 12,663 patients classified under the broad category of psoriasis had a diagnosis code of PPP or PAO as well, 148,887 patients (the national prevalence=0.12%, 95% CI 0.12 to 0.12%) had a diagnosis code of PPP or PAO. Those 12,663 patients with both diagnosis codes of psoriasis and PPP accounted for 2.9% of 429,679 with a diagnosis code of psoriasis and 8.5% of 148,887 with a code of PPP or PAO. Table 1 shows the age-sex distribution of patients with psoriasis and PPP. About 60% were male (male to female ratio=1.44) and the average age was 56.7 years old in patients with psoriasis while about two thirds were female (male to female ratio=0.53) and the average age was 55.5 years old in patients with PPP. Figure 1 shows the national prevalence of psoriasis and PPP in males and females estimated using the census data. For both males and females, the age group 75 to 79 had the highest prevalence in patients with psoriasis while the age group 55 to 59 for females and the age group 60 to 64 for males had the highest prevalence in patients with PPP. In online supplementary table S1, demographic characteristics of patients subdivided into the 3 department subgroups A (dermatology/rheumatology), B (other specialty) and C (not specified) are shown. Of a

1  
2  
3  
4  
5  
6 total of 429,679 patients with psoriasis, 132,189 (30.8%), 33,763 (7.9%) and 263,727  
7  
8 (61.4%) were classified into subgroups A, B and C, respectively. Of a total of 136,224  
9  
10 patients with PPP, 24,195 (20.0%), 12,411 (9.1%) and 96,618 (70.9%) were classified into  
11  
12 subgroups A, B and C, respectively. The male to female ratio was 1.58, 1.33 and 1.39  
13  
14 for psoriasis and 0.52, 0.50 and 0.54 for PPP and the average age was 58.1, 61.8 and  
15  
16 55.3 years old for psoriasis and 57.2, 56.9 and 54.9 years old for PPP in subgroups A, B  
17  
18 and C, respectively.  
19

### 20 21 22 23 **Domestic diagnosis codes**

24  
25 The distribution of domestic diagnosis codes divided into 8 diagnosis subgroups is  
26  
27 shown in Table 2. In patients under the broad category of psoriasis, the proportion of  
28  
29 males was lower than 50% for guttate psoriasis, pustular psoriasis, PPP and PAO but  
30  
31 higher than 70% for erythrodermic psoriasis. Patients with guttate psoriasis were  
32  
33 younger but patients with erythrodermic psoriasis were older than other types of  
34  
35 psoriasis. In patients under the broad category of PPP, patients with PAO included  
36  
37 more females and were younger than patients without PAO. When patients were  
38  
39 subdivided into 3 department subgroups, more than half of patients were in the  
40  
41 department subclass A (dermatology/rheumatology) for “pustular psoriasis”  
42  
43 (2,953/4,636), “erythrodermic psoriasis” (1,045/1,610) and “psoriatic arthritis”  
44  
45 (4,530/8,360) (online supplementary table S2).  
46  
47  
48  
49  
50

### 51 **Seasonal variation of the use of healthcare service**

52  
53 Figure 2 shows the seasonal variation of the use of the healthcare service in patients  
54  
55 with psoriasis and PPP. On average, about 39% of patients with psoriasis and 36% of  
56  
57  
58

1  
2  
3  
4  
5  
6 patients with PPP used the healthcare service in each month. In patients with  
7  
8 psoriasis, the proportion of patients who used the healthcare service in the hottest  
9  
10 season (July or August of 2010) (52.6%) was similar to that in the coldest season  
11  
12 (January or February of 2011) (53.0%) and the difference was -0.3% (95% CI -0.5 to  
13  
14 -0.1%,  $P=0.0004$ ). On the other hand, in patients with PPP, the proportion of patients  
15  
16 who used the service in the hottest season (55.3%) was higher than that in the coldest  
17  
18 season (45.3%) and the difference was 10.0% (9.8 to 10.3%,  $P<0.0001$ ). As shown in  
19  
20 online supplementary tables S3 and S4, the predominance of the use of the healthcare  
21  
22 service in the hottest season in patients with PPP but not in patients with psoriasis was  
23  
24 also observed in all of the 3 department subgroups.  
25  
26  
27  
28  
29

### 30 **Treatments for psoriasis and PPP**

31  
32 In table 3, treatments for psoriasis and PPP are summarized. Systemic therapies  
33  
34 were used mainly for patients with psoriasis but a few patients with PPP also used  
35  
36 etretinate and other systemic therapies. In patients treated by biologics, patients were  
37  
38 relatively young and the proportion of patients with arthropathy was high. Of 3,291  
39  
40 patients with psoriasis on a biologic treatment, 2,674 (81.1%) were in the department  
41  
42 subgroup A (dermatology/rheumatology) (online supplementary table S5).  
43  
44 Phototherapy was more frequently used for patients with PPP than patients with  
45  
46 psoriasis while topical vitamin D was selected more frequently for patients with  
47  
48 psoriasis than patients with PPP. About 80% of patients with both psoriasis and PPP  
49  
50 used topical corticosteroid. No treatment for psoriasis or PPP was given to about 9% of  
51  
52 patients with psoriasis and about 16% of patients with PPP. Both for psoriasis and  
53  
54 PPP, patients with no treatment included more patients with arthropathy when  
55  
56  
57  
58  
59  
60

1  
2  
3  
4  
5 compared with those with topical therapy particularly in the department subgroup B  
6  
7  
8 (other specialty) (online supplementary table S5).  
9

### 10 11 12 **Comorbidities of psoriasis and PPP** 13

14 Table 4 shows the number of patients and standardized prevalence of concurrent  
15 diabetes mellitus, hyperlipidemia and hypertension in the severity classes I to III in  
16 patients with psoriasis and PPP. For patients with psoriasis, the standardized  
17 prevalence was higher in Class I (systemic therapy) than in Class III (topical therapy  
18 only) in the entire population as well as in 3 department subgroups (online  
19 supplementary table S6). The prevalence was similar between Class II (phototherapy)  
20 and Class III except for the department subgroup A (dermatology/rheumatology) where  
21 the prevalence was higher in Class II than in Class III. The prevalence of the  
22 comorbidities was lower in Class IV (no treatment) than Class III in the department  
23 subgroup A (dermatology/rheumatology) but higher in Class IV than in Class III in  
24 other department subgroups (online supplementary table S6). For patients with PPP,  
25 no remarkable difference was observed between Classes I, II and III.  
26  
27  
28  
29  
30  
31  
32  
33  
34  
35  
36  
37  
38  
39  
40  
41  
42  
43  
44  
45  
46  
47  
48  
49  
50  
51  
52  
53  
54  
55  
56  
57  
58  
59  
60

## DISCUSSION

We identified about 0.34% of patients with a diagnosis code of psoriasis and 0.12 % with a code of PPP in the JNDB during the 12-month period between April 2010 and March 2011. About 60% of patients with psoriasis were males while about two thirds of patients with PPP were females. The use of the healthcare service was roughly constant during the 12-month observation period in patients with psoriasis while the use of the service prevailed in summer in patients with PPP. The prevalence of the concurrent diabetes mellitus, hyperlipidemia and hypertension in patients with psoriasis receiving a systemic therapy was higher than that in those receiving a topical therapy only.

The prevalence of psoriasis in our study, 0.34%, was lower than 2 to 4 % in the Western countries and the male predominance in our study was different from the almost equal distribution of males and females in the Western countries ,[1-3]. The low prevalence and male predominance of patients with psoriasis were also found in other Asian countries: e.g., the prevalence of males and females was 0.23% and 0.16 % in Taiwan ,[4] and 0.54% and 0.44% in China ,[5], respectively. On the other hand, the prevalence of PPP in our study, 0.12% was higher than 0.01 to 0.05% in the Western countries though the female predominance in the current study was also observed in the Western countries ,[7,10,11]. Around 20% of patients with PPP were reported to have psoriasis ,[7,12] and in our study, 8.5% of patients with diagnosis code of PPP or PAO had psoriasis. We observed that the male to female ratio was different between psoriasis and PPP and that psoriasis was more prevalent in the older age group than PPP. The seasonal variation of the use of the healthcare service in patients with PPP, as a proxy of the disease activity, was not observed in patients with psoriasis. Those

1  
2  
3  
4  
5  
6 findings are in accordance with the proposal in the International Psoriasis Council in  
7  
8 2007 that PPP should be considered a separate condition from psoriasis ,[11,13].  
9

10 About 9% of patients with psoriasis and 16% of patients with PPP had no therapy for  
11  
12 psoriasis and PPP in our study. In the previous study in the UK, one third of patients  
13  
14 with psoriasis were not using any therapy at the time of evaluation ,[1]. According to a  
15  
16 survey conducted in the US between 2003 and 2011, 49, 24 and 9% of patients with mild,  
17  
18 moderate and severe psoriasis were untreated and about half of patients were  
19  
20 dissatisfied with their treatment ,[14]. In our study, patients with no treatment for  
21  
22 psoriasis and PPP included more patients with arthropathy than those with topical  
23  
24 therapy particularly in the department subgroup B (other specialty) where the severity  
25  
26 class IV (no treatment) might represent more severe psoriasis or PPP than the severity  
27  
28 class III (topical therapy only).  
29  
30

31  
32 Many studies conducted in the Western and Asian countries reported that the  
33  
34 prevalence and incidence of the risk factors for myocardial infarction and stroke such as  
35  
36 diabetes mellitus, hyperlipidemia and hypertension were high in patients with psoriasis,  
37  
38 particularly in those with severe psoriasis ,[15-18]. Psoriasis itself may be the direct  
39  
40 risk factor for those conditions but the increased risk of those conditions may be due to  
41  
42 the high prevalence of obesity and other known predisposing factors ,[19]. It is also  
43  
44 possible that some of the comorbidities are adverse reactions to ciclosporin and other  
45  
46 systematic therapies for psoriasis ,[20]. In our study, the increase of the comorbidity was  
47  
48 observed in patients with severe psoriasis but not in patients with severe PPP when  
49  
50 compared with patients with topical therapy only. This observation may indicate that  
51  
52 psoriasis is a direct risk factor. However, another interpretation may be that  
53  
54 ciclosporin is the major contributor to the high prevalence of the comorbidity because  
55  
56  
57  
58  
59  
60



1  
2  
3  
4  
5  
6  
7  
8  
9  
10  
11  
12  
13  
14  
15  
16  
17  
18  
19  
20  
21  
22  
23  
24  
25  
26  
27  
28  
29  
30  
31  
32  
33  
34  
35  
36  
37  
38  
39  
40  
41  
42  
43  
44  
45  
46  
47  
48  
49  
50  
51  
52  
53  
54  
55  
56  
57  
58  
59  
60

ciclosporin was used by more than half of patients with psoriasis receiving a systemic therapy while ciclosporin was used only by 10% of those with PPP receiving a systematic therapy.

The main limitation of the current study is that the diagnosis codes of psoriasis and PPP are not validated. Therefore, the true national prevalence may be higher or lower than that reported in the current study. One concern is misclassification of diseases particularly when the diagnosis is made by a non-specialist. However, demographic characteristics and other major findings were common to the whole population and department subgroup A (dermatology/rheumatology). This finding would suggest that the whole patients identified by diagnosis codes of the claims in the current study roughly represented patients with psoriasis and PPP who used healthcare service during the observation period in the nation. Nevertheless, we could not exclude some types of misclassification. For instance, the proportion of guttate psoriasis in patients with psoriasis was around 4% in a previous study in Japan ,[21] and higher than 0.6% in the current study (table 2), which could be due to misclassification. The strength of the study is the use of the claims database covering most (more than 90%) patients in the nation.

In conclusion, the study using the JNDB collected from the whole nation revealed that the prevalence of psoriasis was lower and the prevalence of PPP was higher than that in the Western countries. As in the previous studies, the severe psoriasis was associated with the high prevalence of the concurrent diabetes mellitus, hyperlipidemia and hypertension. The national prevalence and other characteristics of psoriasis and PPP estimated in the current descriptive study may provide the basic information for the future studies.

1  
2  
3  
4  
5  
6 **Acknowledgement** We thank Japanese Society for Psoriasis Research which motivated  
7  
8 and encouraged us to conduct the current study.  
9

10 **Contributors** KK conceived and designed the study, analyzed and interpreted the data  
11  
12 and drafted the manuscript. YK analyzed and interpreted the data. TS, NO and DK  
13  
14 contributed to procedures to acquire the data and interpreted the data. HI and HN  
15  
16 contributed to conception and design of the study. In addition, all authors carefully  
17  
18 reviewed the draft and revised it critically. All authors gave the final approval of the  
19  
20 manuscript.  
21

22  
23 **Funding** The current study was supported by the research fund provided by Janssen  
24  
25 Pharmaceutical K.K. which was not involved in any steps of design or conduct of the  
26  
27 research and analysis, interpretation and publication of the results.  
28

29 **Competing interests** None.  
30

31 **Provenance and peer review** Not commissioned; externally peer reviewed.  
32

33  
34 **Data sharing statement** No additional data are available.  
35  
36  
37  
38  
39  
40  
41  
42  
43  
44  
45  
46  
47  
48  
49  
50  
51  
52  
53  
54  
55  
56  
57  
58  
59  
60

**REFERENCES**

1. Gelfand JM, Weinstein R, Porter SB, *et al.* Prevalence and treatment of psoriasis in the United Kingdom - a population-based study. *Arch Dermatol* 2005;141:1537-41.
2. Kurd SK, Gelfand JM. The prevalence of previously diagnosed and undiagnosed psoriasis in US adults - results from NHANES 2003-2004. *J Am Acad Dermatol* 2009; 60:218-24.
3. Parisi R, Symmons DP, Griffiths CE, *et al.* Identification and Management of Psoriasis and Associated Comorbidity (IMPACT) project team. Global epidemiology of psoriasis - a systematic review of incidence and prevalence. *J Invest Dermatol* 2013;133: 377-85.
4. Chang YT, Chen TJ, Liu PC, *et al.* Epidemiological study of psoriasis in the National Health Insurance Database in Taiwan. *Acta Derm Venereol* 2009;89:262-66.
5. Ding X, Wang T, Shen Y, *et al.* Prevalence of psoriasis in China - a population-based study in six cities. *Eur J Dermatol* 2012; 22:663-67.
6. Barber HW. Acrodermatitis continua vel perstans (dermatitis repens) and psoriasis pustulosa. *Br J Dermatol* 1930; 42:500-18.
7. De Waal AC, Van de Kerkhof PCM. Pustulosis palmoplantaris is a disease distinct

- 1  
2  
3  
4  
5  
6 from psoriasis. *J Dermatolog Treat* 2011;22:102-105.  
7  
8
- 9 8. Ministry of Health, Labour and Welfare. [Current status of electronic submission  
10  
11 of health care claims and advancement of reimbursement of health care service fee].  
12  
13 2011 Jul 21. Japanese. [http://www.mhlw.go.jp/stf/shingi/2r9852000001jcmq-att](http://www.mhlw.go.jp/stf/shingi/2r9852000001jcmq-att/2r9852000001jcu1.pdf)  
14  
15  
16  
17  
18 /2r9852000001jcu1.pdf (accessed 9 August 2014).  
19
- 20 9. Greenland S, Rothman KJ. Introduction to stratified analysis. In: Rothman KL,  
21  
22 Greenland S, Lash T, eds. *Modern Epidemiology*. 3rd ed. Philadelphia:  
23  
24 Lippincott Williams & Wilkins; 2008: 258-82.  
25  
26  
27
- 28 10. Asumalahti K, Ameen M, Suomela S, *et al*. Genetic analysis of PSORS1  
29  
30 distinguishes guttate psoriasis and palmoplantar pustulosis. *J Invest Dermatol*  
31  
32 2003;120: 627-32.  
33  
34  
35  
36  
37
- 38 11. Brunasso AM, Puntoni M, Aberer W, *et al*. Clinical and epidemiological comparison  
39  
40 of patients affected by palmoplantar plaque psoriasis and palmoplantar pustulosis -  
41  
42 a case series study. *Br J Dermatol* 2013;168:1243-51.  
43  
44  
45
- 46 12. Gelfand JM, Neimann AL, Shin DB, *et al*. Risk of myocardial infarction in patients  
47  
48 with psoriasis. *JAMA* 2006; 296:1735-41.  
49  
50  
51
- 52 13. Griffiths CE, Christophers E, Barker JN, *et al*. A classification of psoriasis vulgaris  
53  
54 according to phenotype. *Br J Dermatol* 2007;168:1243-51.  
55  
56  
57  
58  
59  
60

- 1  
2  
3  
4  
5  
6 14. Armstrong AW, Robertson AD, Wu J, *et al.* Undertreatment, treatment trends, and  
7  
8 treatment dissatisfaction among patients with psoriasis and psoriatic arthritis in  
9  
10 the United States - findings from the national psoriasis foundation surveys,  
11  
12 2003-2011. *JAMA Dermatol* 2013;149:1180-85.  
13  
14  
15  
16  
17 15. Azfar RS, Seminara NM, Shin DB, *et al.* Increased risk of diabetes mellitus and  
18  
19 likelihood of receiving diabetes mellitus treatment in patients with psoriasis.  
20  
21  
22 *Arch Dermatol* 2012; 148:995-1000.  
23  
24  
25  
26 16. Cohen AD, Weitzman D, Dreiherr J. Psoriasis and hypertension - a case-control study.  
27  
28  
29 *Acta Derm Venereol* 2010;90: 23-26.  
30  
31  
32 17. Ma C, Harskamp CT, Armstrong EJ, *et al.* The association between psoriasis and  
33  
34 dyslipidaemia - a systematic review. *Br J Dermatol* 2013;168:486-95.  
35  
36  
37  
38 18. Tsai TF, Wang TS, Hung ST, *et al.* Epidemiology and comorbidities of psoriasis  
39  
40 patients in a national database in Taiwan. *J Dermatol Sci* 2011; 63:40-46.  
41  
42  
43  
44 19. Samarasekera EJ, Neilson JM, Warren RB, *et al.* Incidence of cardiovascular  
45  
46 disease in individuals with psoriasis - a systematic review and meta-analysis. *J*  
47  
48 *Invest Dermatol* 2013;133, 2340-46.  
49  
50  
51  
52 20. Kremers HM, McEvoy MT, Dann FJ, *et al.* Heart disease in psoriasis. *J Am Acad*  
53  
54 *Dermatol* 2007;57:347-54.  
55  
56  
57  
58  
59  
60

1  
2  
3  
4  
5  
6  
7  
8  
9  
10  
11  
12  
13  
14  
15  
16  
17  
18  
19  
20  
21  
22  
23  
24  
25  
26  
27  
28  
29  
30  
31  
32  
33  
34  
35  
36  
37  
38  
39  
40  
41  
42  
43  
44  
45  
46  
47  
48  
49  
50  
51  
52  
53  
54  
55  
56  
57  
58  
59  
60

21. Takahashi H, Nakamura K, Kaneko F, *et al.* Japanese Society for Psoriasis Research.. Analysis of psoriasis patients registered in Japanese Society for Psoriasis Research from 2002 to 2008. *J Dermatol* 2011;38: 1125-29.

For peer review only

**Table 1**

Age-sex distribution of patients with psoriasis and PPP in Japanese National Database

| Age   | Psoriasis* |         |         | PPP    |        |         |
|-------|------------|---------|---------|--------|--------|---------|
|       | Male       | Female  | Total   | Male   | Female | Total   |
| 0-9   | 3,376      | 3,177   | 6,553   | 396    | 382    | 778     |
| 10-19 | 4,430      | 5,046   | 9,476   | 689    | 923    | 1,612   |
| 20-29 | 9,800      | 9,904   | 19,704  | 1,821  | 3,673  | 5,494   |
| 30-39 | 27,915     | 22,251  | 50,166  | 5,049  | 9,388  | 14,437  |
| 40-49 | 34,637     | 21,588  | 56,225  | 7,256  | 13,237 | 20,493  |
| 50-59 | 44,963     | 28,146  | 73,109  | 10,318 | 23,157 | 33,475  |
| 60-69 | 59,510     | 33,907  | 93,417  | 12,384 | 23,021 | 35,405  |
| 70-79 | 48,072     | 30,930  | 79,002  | 7,070  | 11,559 | 18,629  |
| 80-   | 21,070     | 20,957  | 42,027  | 2,265  | 3,636  | 5,901   |
| Total | 253,773    | 175,906 | 429,679 | 47,248 | 88,976 | 136,224 |

\* Patients with both of diagnosis codes of psoriasis and PPP are classified as those with psoriasis  
 PPP, palmoplantar pustulosis.

**Table 2**

Diagnoses given in claims for patients with psoriasis and PPP in Japanese National Database

| Diagnoses               | N*      | (%)    | Male    | (%)    | Age (SD)     |
|-------------------------|---------|--------|---------|--------|--------------|
| <b>Psoriasis</b>        |         |        |         |        |              |
| Plaque psoriasis        | 418,705 | (97.4) | 248,770 | (59.4) | 56.7 (18.7)  |
| Scalp psoriasis         | 2,832   | (0.7)  | 1,682   | (59.4) | 57.2 (18.1)  |
| Guttate psoriasis       | 2,572   | (0.6)  | 1,136   | (44.2) | 42.4 (20.6)  |
| Psoriatic arthritis     | 8,360   | (1.9)  | 4,431   | (53.0) | 55.5 (15.1)  |
| Pustular psoriasis      | 4,636   | (1.1)  | 2,250   | (48.5) | 55.9 (19.3)  |
| Erythrodermic psoriasis | 1,610   | (0.4)  | 1,176   | (73.0) | 60.4 (17.2)] |
| PPP †                   | 12,625  | (2.9)  | 4,675   | (37.0) | 58.3 (13.7)  |
| PAO †                   | 401     | (0.1)  | 85      | (21.2) | 53.1 (12.1)  |
| Total                   | 429,679 | (100)  | 253,773 | (59.1) | 56.7 (18.7)  |
| <b>PPP</b>              |         |        |         |        |              |
| PPP                     | 135,647 | (99.6) | 47,063  | (34.7) | 55.5 (15.5)  |
| PAO                     | 5,734   | (4.2)  | 1,307   | (22.8) | 52.1 (12.6)  |
| Total                   | 136,224 | (100)  | 47,248  | (34.7) | 55.5 (15.5)  |

\* One patient is counted once for each diagnosis and sum of patients with 8 diagnoses for psoriasis and that of 2 diagnoses for PPP exceed a total.

† Patients with diagnosis codes of psoriasis and PPP or PAO.

PPP, palmoplantar pustulosis; PAO, pustulotic arthro-osteitis.



**Table 3**

Treatments for psoriasis and PPP in Japanese National Database

| PAO                     | Psoriasis<br>N=429,679 |                   |                |                               | PPP<br>N=136,224  |                  |                |                |
|-------------------------|------------------------|-------------------|----------------|-------------------------------|-------------------|------------------|----------------|----------------|
|                         | Male                   |                   | Age<br>(SD)    | Psoriatic<br>arthritis<br>(%) | Male              |                  |                | N<br>(%)       |
|                         | N*<br>(%)              | N<br>(%)          |                |                               | N*<br>(%)         | N<br>(%)         | Age<br>(SD)    |                |
| <b>Systemic therapy</b> |                        |                   |                |                               |                   |                  |                |                |
| Adalimumab              | 1,322<br>(0.3)         | 892<br>(67.5)     | 50.0<br>(14.0) | 453<br>(34.3)                 | 64<br>(0.05)      | 12<br>(18.8)     | 59.1<br>(12.1) | 7<br>(10.9)    |
| Infliximab              | 2,141<br>(0.5)         | 1,344<br>(62.8)   | 48.1<br>(13.9) | 741<br>(34.6)                 | 197<br>(0.1)      | 55<br>(27.9)     | 51.5<br>(13.5) | 13<br>(6.6)    |
| Ustekinumab             | -- †                   |                   |                |                               | -- †              |                  |                |                |
| Methotrexate            | 1,680<br>(0.4)         | 1,072<br>(63.8)   | 52.0<br>(15.5) | 480<br>(28.6)                 | 174<br>(0.1)      | 53<br>(30.5)     | 54.6<br>(13.4) | 19<br>(10.9)   |
| Ciclosporin             | 21,997<br>(5.1)        | 13,813<br>(62.8)  | 53.2<br>(16.2) | 1,604<br>(7.3)                | 251<br>(0.2)      | 98<br>(39.0)     | 52.9<br>(13.8) | 20<br>(8.0)    |
| Etretinate              | 15,481<br>(3.6)        | 11,025<br>(71.2)  | 60.1<br>(13.6) | 609<br>(3.9)                  | 1,950<br>(1.4)    | 725<br>(37.2)    | 57.5<br>(11.7) | 35<br>(1.8)    |
| Phototherapy            | 21,005<br>(4.9)        | 12,370<br>(58.9)  | 54.6<br>(18.1) | 309<br>(1.5)                  | 10,408<br>(7.6)   | 3,657<br>(35.1)  | 53.3<br>(15.0) | 156<br>(1.5)   |
| <b>Topical therapy</b>  |                        |                   |                |                               |                   |                  |                |                |
| Topical                 |                        |                   |                |                               |                   |                  |                |                |
| vitamin D<br>(59.6)     | 256,122<br>(60.9)      | 156,050<br>(18.5) | 53.4<br>(1.4)  | 3,698<br>(31.5)               | 42,903<br>(33.3)  | 14,276<br>(14.9) | 53.0<br>(1.4)  | 612            |
| Topical                 |                        |                   |                |                               |                   |                  |                |                |
| corticosteroid          | 349,568<br>(81.4)      | 211,744<br>(60.6) | 54.9<br>(18.1) | 5,323<br>(1.5)                | 109,692<br>(80.5) | 37,881<br>(34.5) | 53.4<br>(15.3) | 3,576<br>(3.3) |
| No treatment            | 38,224<br>(8.9)        | 19,398<br>(50.7)  | 58.6<br>(19.5) | 1,851<br>(4.8)                | 21,209<br>(15.6)  | 7,527<br>(35.5)  | 54.6<br>(16.2) | 2,083<br>(9.8) |

1  
2  
3  
4  
5  
6  
7  
8  
9  
10  
11  
12  
13  
14  
15  
16  
17  
18  
19  
20  
21  
22  
23  
24  
25  
26  
27  
28  
29  
30  
31  
32  
33  
34  
35  
36  
37  
38  
39  
40  
41  
42  
43  
44  
45  
46  
47  
48  
49  
50  
51  
52  
53  
54  
55  
56  
57  
58  
59  
60

Table 3 --- continued

\* One patient is counted once for each treatment.

† Less than 10 patients had ustekinumab which was approved in the last month of the observation period.

PPP, palmoplantar pustulosis; PAO, pustulotic arthro-osteitis.

For peer review only

**Table 4**

Prevalence of diabetes mellitus, hyperlipidemia and hypertension in 3 severity classes of patients with psoriasis and PPP in Japanese National Database

|                          | Psoriasis                       |                                 |                                   | PPP                             |                                 |                                   |
|--------------------------|---------------------------------|---------------------------------|-----------------------------------|---------------------------------|---------------------------------|-----------------------------------|
|                          | Class I<br>Systemic<br>therapy* | Class II<br>Photo-<br>therapy † | Class III<br>Topical<br>therapy ‡ | Class I<br>Systemic<br>therapy* | Class II<br>Photo-<br>therapy † | Class III<br>Topical<br>therapy ‡ |
|                          | N=                              | N=                              | N=                                | N=                              | N=                              | N=                                |
|                          | 39,796                          | 18,833                          | 332,826                           | 2,588                           | 10,153                          | 102,274                           |
| <b>Diabetes mellitus</b> |                                 |                                 |                                   |                                 |                                 |                                   |
| N §                      | 5,271                           | 1,747                           | 32,378                            | 260                             | 686                             | 7,585                             |
| Prevalence ¶ (%)         | 12.7                            | 9.0                             | 9.6                               | 9.3                             | 7.7                             | 8.5                               |
| Difference ** (%)        | 3.1                             | -0.6                            | ref                               | 0.8                             | -0.8                            | ref                               |
| (95%CI)                  | (2.7,3.4)                       | (-1.0,-0.2)                     |                                   | (-0.5,2.1)                      | (-1.4,-0.2)                     |                                   |
| <b>Hyperlipidemia</b>    |                                 |                                 |                                   |                                 |                                 |                                   |
| N §                      | 8,208                           | 3,125                           | 56,561                            | 557                             | 1,731                           | 17,783                            |
| Prevalence ¶ (%)         | 20.7                            | 16.7                            | 17.5                              | 18.3                            | 17.4                            | 17.3                              |
| Difference ** (%)        | 3.2                             | -0.8                            | ref                               | 1.0                             | 0.1                             | ref                               |
| (95%CI)                  | (2.8,3.6)                       | (-1.3,-0.3)                     |                                   | (-0.6,2.6)                      | (-0.7,1.0)                      |                                   |
| <b>Hypertension</b>      |                                 |                                 |                                   |                                 |                                 |                                   |
| N §                      | 11,795                          | 4,369                           | 78,996                            | 576                             | 1,885                           | 19,332                            |
| Prevalence ¶ (%)         | 28.5                            | 22.8                            | 23.4                              | 22.4                            | 21.8                            | 21.7                              |
| Difference ** (%)        | 5.1                             | -0.6                            | ref                               | 0.6                             | 0.04                            | ref                               |
| (95%CI)                  | (4.7,5.6)                       | (-1.2,-0.1)                     |                                   | (-1.0,2.3)                      | (-0.9,0.9)                      |                                   |

\* Patients who had one or more of systemic therapies given in Table 3.

† Patients with phototherapy but no systemic therapy.

‡ Patients with topical vitamin D or topical corticosteroid only.

§ Number of patients with a diagnosis code of the concurrent disease (diabetes mellitus, hyperlipidemia or hypertension) at least in one claim as well as drugs to treat the concurrent disease in the claims issued in 2 or more different months.

¶ Prevalence standardized to the distribution of age and sex in the entire study population of 565,903 subjects.

\*\* Difference in prevalence compared with Class III.

1  
2  
3  
4  
5  
6  
7  
8  
9  
10  
11  
12  
13  
14  
15  
16  
17  
18  
19  
20  
21  
22  
23  
24  
25  
26  
27  
28  
29  
30  
31  
32  
33  
34  
35  
36  
37  
38  
39  
40  
41  
42  
43  
44  
45  
46  
47  
48  
49  
50  
51  
52  
53  
54  
55  
56  
57  
58  
59  
60

Table 4 --- continued

PPP, palmoplantar pustulosis; CI, confidence interval.

For peer review only

### Legends of figures

**Figure 1.** The national prevalence of psoriasis and palmoplantar pustulosis (PPP) in Japanese population. The prevalence was estimated as the counts of patients with psoriasis or PPP in the Japanese national claims database between April 2010 and March 2011 divided by the population size in the census data as of October 2010.

**Figure 2.** The use of the healthcare service in patients with psoriasis and palmoplantar pustulosis (PPP). The proportion was estimated as the number of patients for whom a claim with a diagnosis code of psoriasis or PPP was issued in each of 12 months between April 2010 and March 2011 divided by the number of the whole patients with psoriasis and PPP, respectively.

1  
2  
3  
4  
5  
6  
7  
8  
9  
10  
11  
12  
13  
14  
15  
16  
17  
18  
19  
20  
21  
22  
23  
24  
25  
26  
27  
28  
29  
30  
31  
32  
33  
34  
35  
36  
37  
38  
39  
40  
41  
42  
43  
44  
45  
46  
47  
48  
49  
50  
51  
52  
53  
54  
55  
56  
57  
58  
59  
60

Prevalence (per 100,000 population)

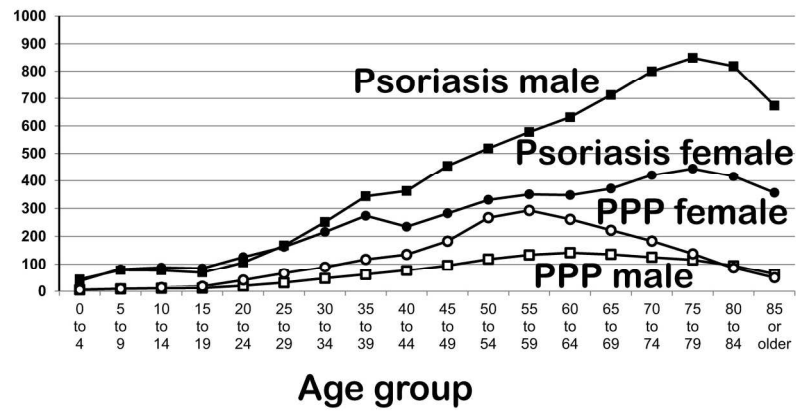

186x122mm (300 x 300 DPI)

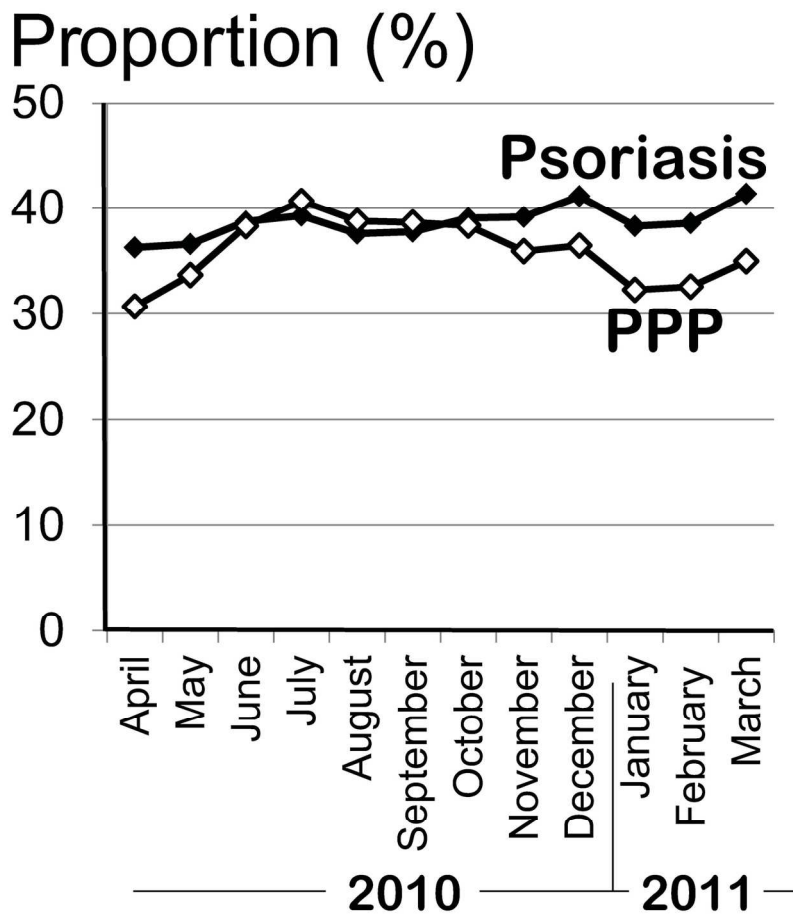

160x146mm (300 x 300 DPI)

Only

1  
2  
3  
4  
5  
6  
7  
8  
9  
10  
11  
12  
13  
14  
15  
16  
17  
18  
19  
20  
21  
22  
23  
24  
25  
26  
27  
28  
29  
30  
31  
32  
33  
34  
35  
36  
37  
38  
39  
40  
41  
42  
43  
44  
45  
46  
47  
48  
49  
50  
51  
52  
53  
54  
55  
56  
57  
58  
59  
60

## Supplementary Tables

## Supplementary Table S1

Age-sex distribution of patients with psoriasis and PPP subdivided by the department specified in a claim with a diagnosis code of psoriasis and PPP in Japanese National Database

| Age<br>(years old)                                                | Psoriasis <sup>a</sup> |                 | PPP           |                 |
|-------------------------------------------------------------------|------------------------|-----------------|---------------|-----------------|
|                                                                   | Male<br>N (%)          | Female<br>N (%) | Male<br>N (%) | Female<br>N (%) |
| All patients                                                      |                        |                 |               |                 |
| 0-9                                                               | 3,376 (1.3)            | 3,177 (1.8)     | 396 (0.8)     | 382 (0.4)       |
| 10-19                                                             | 4,430 (1.7)            | 5,046 (2.9)     | 689 (1.5)     | 923 (1.0)       |
| 20-29                                                             | 9,800 (3.9)            | 9,904 (5.6)     | 1,821 (3.9)   | 3,673 (4.1)     |
| 30-39                                                             | 27,915 (11.0)          | 22,251 (12.6)   | 5,049 (10.7)  | 9,388 (10.6)    |
| 40-49                                                             | 34,637 (13.6)          | 21,588 (12.3)   | 7,256 (15.4)  | 13,237 (14.9)   |
| 50-59                                                             | 44,963 (17.7)          | 28,146 (16.0)   | 10,318 (21.8) | 23,157 (26.0)   |
| 60-69                                                             | 59,510 (23.5)          | 33,907 (19.3)   | 12,384 (26.2) | 23,021 (25.9)   |
| 70-79                                                             | 48,072 (18.9)          | 30,930 (17.6)   | 7,070 (15.0)  | 11,559 (13.0)   |
| 80-                                                               | 21,070 (8.3)           | 20,957 (11.9)   | 2,265 (4.8)   | 3,636 (4.1)     |
| Total                                                             | 253,773 (100)          | 175,906 (100)   | 47,248 (100)  | 88,976 (100)    |
| Mean (SD)                                                         | 57.1 (17.8)            | 56.1 (19.9)     | 55.7 (16.1)   | 55.5 (15.2)     |
| Patients of dermatology or rheumatology (subgroup A) <sup>b</sup> |                        |                 |               |                 |
| 0-9                                                               | 810 (1.0)              | 814 (1.6)       | 36 (0.4)      | 88 (0.3)        |
| 10-19                                                             | 1,137 (1.4)            | 1,278 (2.5)     | 70 (0.8)      | 110 (0.6)       |
| 20-29                                                             | 2,659 (3.3)            | 2,561 (5.0)     | 247 (2.7)     | 578 (3.2)       |
| 30-39                                                             | 7,677 (9.5)            | 5,582 (10.9)    | 828 (8.9)     | 1,567 (8.8)     |
| 40-49                                                             | 9,831 (12.1)           | 5,978 (11.7)    | 1,247 (13.4)  | 2,464 (13.8)    |
| 50-59                                                             | 13,674 (16.9)          | 8,607 (16.8)    | 1,946 (20.9)  | 4,777 (26.7)    |
| 60-69                                                             | 20,802 (25.7)          | 11,290 (22.0)   | 2,851 (30.6)  | 5,226 (29.2)    |
| 70-79                                                             | 17,355 (21.4)          | 9,840 (19.2)    | 1,638 (17.6)  | 2,493 (13.9)    |
| 80-                                                               | 6,975 (8.6)            | 5,319 (10.4)    | 442 (4.8)     | 623 (3.5)       |
| Total                                                             | 80,920 (100)           | 51,269 (100)    | 9,305 (100)   | 17,890 (100)    |
| Mean (SD)                                                         | 58.8 (17.1)            | 57.1 (19.0)     | 58.1 (14.8)   | 56.8 (14.1)     |



Supplementary Table S1 -- continued

| Age<br>(years old)                                                                      | Psoriasis <sup>a</sup> |                 | PPP           |                 |
|-----------------------------------------------------------------------------------------|------------------------|-----------------|---------------|-----------------|
|                                                                                         | Male<br>N (%)          | Female<br>N (%) | Male<br>N (%) | Female<br>N (%) |
| Patients of department other than dermatology or rheumatology (subgroup B) <sup>c</sup> |                        |                 |               |                 |
| 0-9                                                                                     | 288 (1.5)              | 232 (1.6)       | 53 (1.3)      | 30 (0.4)        |
| 10-19                                                                                   | 210 (1.1)              | 225 (1.6)       | 56 (1.3)      | 61 (0.7)        |
| 20-29                                                                                   | 418 (2.2)              | 476 (3.3)       | 110 (2.6)     | 265 (3.2)       |
| 30-39                                                                                   | 1,304 (6.8)            | 1,098 (7.6)     | 384 (9.2)     | 818 (9.9)       |
| 40-49                                                                                   | 1,889 (9.8)            | 1,380 (9.5)     | 600 (14.4)    | 1,091 (13.2)    |
| 50-59                                                                                   | 3,058 (15.9)           | 2,091 (14.4)    | 891 (21.4)    | 2,137 (25.9)    |
| 60-69                                                                                   | 4,797 (24.9)           | 3,091 (21.3)    | 1,165 (28.0)  | 2,238 (27.1)    |
| 70-79                                                                                   | 4,825 (25.1)           | 3,283 (22.6)    | 669 (16.1)    | 1,169 (14.2)    |
| 80-                                                                                     | 2,460 (12.8)           | 2,638 (18.2)    | 226 (5.4)     | 448 (5.4)       |
| Total                                                                                   | 19,249 (100)           | 14,514 (100)    | 4,154 (100)   | 8,257 (100)     |
| Mean (SD)                                                                               | 61.7 (17.2)            | 61.9 (18.9)     | 56.8 (16.1)   | 56.9 (15.0)     |
| Patients of department not specified (subgroup C) <sup>d</sup>                          |                        |                 |               |                 |
| 0-9                                                                                     | 2,278 (1.5)            | 2,131 (1.9)     | 307 (0.9)     | 300 (0.5)       |
| 10-19                                                                                   | 3,083 (2.0)            | 3,543 (3.2)     | 563 (1.7)     | 752 (1.2)       |
| 20-29                                                                                   | 6,723 (4.4)            | 6,867 (6.2)     | 1,464 (4.3)   | 2,830 (4.5)     |
| 30-39                                                                                   | 18,934 (12.3)          | 15,571 (14.1)   | 3,837 (11.4)  | 7,003 (11.1)    |
| 40-49                                                                                   | 22,917 (14.9)          | 14,230 (12.9)   | 5,409 (16.0)  | 9,682 (15.4)    |
| 50-59                                                                                   | 28,231 (18.4)          | 17,448 (15.8)   | 7,481 (22.1)  | 16,243 (25.9)   |
| 60-69                                                                                   | 33,911 (22.1)          | 19,526 (17.7)   | 8,368 (24.8)  | 15,557 (24.8)   |
| 70-79                                                                                   | 25,892 (16.9)          | 17,807 (16.2)   | 4,763 (14.1)  | 7,897 (12.6)    |
| 80-                                                                                     | 11,635 (7.6)           | 13,000 (11.8)   | 1,597 (4.7)   | 2,565 (4.1)     |
| Total                                                                                   | 153,604 (100)          | 110,123 (100)   | 33,789 (100)  | 62,829 (100)    |
| Mean (SD)                                                                               | 55.6 (18.0)            | 54.9 (20.3)     | 54.9 (16.4)   | 54.9 (15.4)     |

## Supplementary Table S1 -- continued

a Patients with both of diagnosis codes of psoriasis and PPP are classified as those with psoriasis.

b Patients with at least one claim with diagnosis code of psoriasis or PPP where the department was specified as dermatology or rheumatology during the 12-month observation period.

c Patients with a diagnosis code of psoriasis or PPP where the department was specified as that other specialty but not as dermatology or rheumatology.

d Patients with a diagnosis code of psoriasis or PPP where the department was not specified.

PPP, palmoplantar pustulosis.

## Supplementary Table S2

Diagnosis codes of psoriasis and PPP classified by the department specified in a claim in Japanese National Database

|                                      | Department         |                     |                               |                                 | Not specified <sup>e</sup> | All patients   |
|--------------------------------------|--------------------|---------------------|-------------------------------|---------------------------------|----------------------------|----------------|
|                                      | Specified          |                     |                               |                                 |                            |                |
|                                      | Derma <sup>a</sup> | Rheuma <sup>b</sup> | Derma/<br>rheuma <sup>c</sup> | Other<br>specialty <sup>d</sup> | N <sup>f</sup>             | N <sup>f</sup> |
|                                      | N <sup>f</sup>     | N <sup>f</sup>      | N <sup>f</sup>                | N <sup>f</sup>                  | N <sup>f</sup>             | N <sup>f</sup> |
|                                      | (%)                | (%)                 | (%)                           | (%)                             | (%)                        | (%)            |
| Psoriasis                            | 130,953            | 2,301               | 132,189                       | 33,763                          | 263,727                    | 429,679        |
|                                      | (100)              | (100)               | (100)                         | (100)                           | (100)                      | (100)          |
| Plaque psoriasis                     | 127,170            | 1,602               | 127,822                       | 30,808                          | 260,075                    | 418,705        |
|                                      | (97.1)             | (69.6)              | (96.7)                        | (96.5)                          | (98.6)                     | (97.4)         |
| Psoriasis vulgaris                   | 103,573            | 1,161               | 104,002                       | 20,202                          | 214,621                    | 338,825        |
|                                      | (79.1)             | (50.5)              | (78.7)                        | (59.8)                          | (81.4)                     | (78.9)         |
| Psoriasis                            | 20,972             | 528                 | 21,231                        | 11,159                          | 44,821                     | 77,302         |
|                                      | (16.0)             | (22.9)              | (16.1)                        | (33.1)                          | (17.0)                     | (18.0)         |
| Psoriasis vulgaris of<br>entire body | 7,262              | 66                  | 7,267                         | 579                             | 2,030                      | 9,876          |
|                                      | (5.5)              | (2.9)               | (5.5)                         | (1.7)                           | (0.8)                      | (2.3)          |
| Psoriasis of extremities             | 387                | --- <sup>g</sup>    | 390                           | 99                              | 411                        | 900            |
|                                      | (0.3)              |                     | (0.3)                         | (0.3)                           | (0.2)                      | (0.2)          |
| Psoriasis vulgaris of<br>extremities | 3,210              | 24                  | 3,214                         | 371                             | 2,417                      | 6,002          |
|                                      | (2.5)              | (1.0)               | (2.4)                         | (1.1)                           | (0.9)                      | (1.4)          |
| Psoriasis vulgaris of<br>lower back  | 144                | --- <sup>g</sup>    | 144                           | 38                              | 74                         | 256            |
|                                      | (0.1)              |                     | (0.1)                         | (0.1)                           | (0.03)                     | (0.1)          |
| Plaque psoriasis                     | 70                 | --- <sup>g</sup>    | 70                            | 11                              | 33                         | 114            |
|                                      | (0.1)              |                     | (0.1)                         | (0.03)                          | (0.01)                     | (0.03)         |

Supplementary Table S2 ---continued

|                                              | Department            |                       |                               |                                 | Not specified <sup>e</sup> | All patients          |
|----------------------------------------------|-----------------------|-----------------------|-------------------------------|---------------------------------|----------------------------|-----------------------|
|                                              | Specified             |                       |                               |                                 |                            |                       |
|                                              | Derma <sup>a</sup>    | Rheuma <sup>b</sup>   | Derma/<br>rheuma <sup>c</sup> | Other<br>specialty <sup>d</sup> |                            |                       |
|                                              | N <sup>f</sup><br>(%) | N <sup>f</sup><br>(%) | N <sup>f</sup><br>(%)         | N <sup>f</sup><br>(%)           | N <sup>f</sup><br>(%)      | N <sup>f</sup><br>(%) |
| Scalp psoriasis                              | 1,177<br>(0.9)        | --- <sup>g</sup>      | 1,180<br>(0.9)                | 257<br>(0.8)                    | 1,395<br>(0.5)             | 2,832<br>(0.7)        |
| Seborrheic psoriasis <sup>h</sup>            | 123<br>(0.1)          | --- <sup>g</sup>      | 123<br>(0.1)                  | 118<br>(0.3)                    | 350<br>(0.1)               | 591<br>(0.1)          |
| Psoriasis vulgaris of<br>scalp               | 1,055<br>(0.8)        | --- <sup>g</sup>      | 1,058<br>(0.8)                | 140<br>(0.4)                    | 1,046<br>(0.4)             | 2,244<br>(0.5)        |
| Guttate psoriasis                            | 1,241<br>(0.9)        | --- <sup>g</sup>      | 1,242<br>(0.9)                | 137<br>(0.4)                    | 1,193<br>(0.5)             | 2,572<br>(0.6)        |
| Psoriatic arthritis                          | 3,774<br>(2.9)        | 1,210<br>(52.6)       | 4,530<br>(3.4)                | 2,128<br>(6.3)                  | 1,702<br>(0.6)             | 8,360<br>(1.9)        |
| Psoriatic arthritis                          | 3,686<br>(2.8)        | 960<br>(41.7)         | 4,206<br>(3.2)                | 1,529<br>(4.5)                  | 1,410<br>(0.5)             | 7,145<br>(1.7)        |
| Psoriatic arthritis<br>mutilans <sup>i</sup> | 63<br>(0.05)          | 244<br>(10.6)         | 292<br>(0.2)                  | 575<br>(1.7)                    | 272<br>(0.1)               | 1,139<br>(0.3)        |
| Psoriatic spondylitis                        | 82<br>(0.1)           | 24<br>(1.0)           | 93<br>(0.1)                   | 45<br>(0.1)                     | 25<br>(0.01)               | 163<br>(0.04)         |
| Pustular psoriasis                           | 2,941<br>(2.2)        | 67<br>(2.9)           | 2,953<br>(2.2)                | 409<br>(1.2)                    | 1,274<br>(0.5)             | 4,636<br>(1.1)        |
| Pustular psoriasis                           | 2,595<br>(2.0)        | 62<br>(2.7)           | 2,606<br>(2.0)                | 238<br>(0.7)                    | 822<br>(0.3)               | 3,666<br>(0.9)        |
| Impetigo herpetiformis <sup>j</sup>          | 128<br>(0.1)          | --- <sup>g</sup>      | 128<br>(0.1)                  | 160<br>(0.5)                    | 255<br>(0.1)               | 543<br>(0.1)          |

Supplementary Table S2 ---continued

|                                         | Department            |                       |                               |                                 | Not specified <sup>e</sup> | All patients          |
|-----------------------------------------|-----------------------|-----------------------|-------------------------------|---------------------------------|----------------------------|-----------------------|
|                                         | Specified             |                       |                               |                                 |                            |                       |
|                                         | Derma <sup>a</sup>    | Rheuma <sup>b</sup>   | Derma/<br>rheuma <sup>c</sup> | Other<br>specialty <sup>d</sup> |                            |                       |
|                                         | N <sup>f</sup><br>(%) | N <sup>f</sup><br>(%) | N <sup>f</sup><br>(%)         | N <sup>f</sup><br>(%)           | N <sup>f</sup><br>(%)      | N <sup>f</sup><br>(%) |
| Acrodermatitis continua                 | 242<br>(0.2)          | --- <sup>g</sup>      | 243<br>(0.2)                  | 12<br>(0.04)                    | 199<br>(0.1)               | 454<br>(0.1)          |
| Generalized pustular<br>psoriasis       | 28<br>(0.02)          | --- <sup>g</sup>      | 28<br>(0.02)                  | --- <sup>g</sup>                | --- <sup>g</sup>           | 32<br>(0.01)          |
| Acute generalized pustular<br>Psoriasis | --- <sup>g</sup>      | --- <sup>g</sup>      | --- <sup>g</sup>              | --- <sup>g</sup>                | --- <sup>g</sup>           | --- <sup>g</sup>      |
| Erythrodermic psoriasis                 | 1,045<br>(0.8)        | 35<br>(1.5)           | 1,057<br>(0.8)                | 223<br>(0.7)                    | 330<br>(0.1)               | 1610<br>(0.4)         |
| PPP                                     | 6,170<br>(4.7)        | 82<br>(3.6)           | 6,194<br>(4.7)                | 811<br>(2.4)                    | 5,620<br>(2.1)             | 12,625<br>(2.9)       |
| PAO <sup>k</sup>                        | 173<br>(0.1)          | 21<br>(0.9)           | 180<br>(0.1)                  | 73<br>(0.2)                     | 146<br>(0.1)               | 401<br>(0.1)          |
| PPP                                     | 26,928<br>(100)       | 435<br>(100)          | 27,195<br>(100)               | 12,411<br>(100)                 | 96,618<br>(100)            | 136,224<br>(100)      |
| PPP                                     | 26,880<br>(99.8)      | 394<br>(90.6)         | 27,109<br>(99.7)              | 11,979<br>(96.5)                | 96,559<br>(99.9)           | 135,647<br>(99.6)     |
| PAO <sup>l</sup>                        | 689<br>(2.6)          | 112<br>(25.7)         | 762<br>(2.8)                  | 3,268<br>(26.3)                 | 1,704<br>(1.8)             | 5,734<br>(4.2)        |

## Supplementary Table S2 -- continued

a Patients with at least one claim with a diagnosis code of psoriasis or PPP where the department was specified as dermatology during the 12-month observation period.

b Patients with at least one claim where the department was specified as rheumatology.

c Patients with at least one claim where the department was specified as dermatology or rheumatology (department subgroup A).

d Patients with any claim where the department was specified as other specialty but not dermatology or rheumatology (department subgroup B).

e Patients with claims where the department was not specified (department subgroup C).

f One patient is counted once for each code and for subclass of diagnosis and therefore sum of lower categories may exceed a total of upper category.

g Less than 10 patients were found.

h "Internal medicine" was specified for 68 (58%) of 118 patients with "Seborrheic psoriasis" in the department of other specialty.

i "Orthopedics" was specified for 470 (82%) of 575 patients with "Psoriatic arthritis mutilans" in the department of other specialty.

j "Internal medicine" was specified for 61 (38%) of 160 patients with "Impetigo herpetiformis" in the department of other specialty.

k "Internal medicine" was specified for 54 (74%) of 73 patients with "PAO" in the department of other specialty under the broad disease category of psoriasis.

l "Internal medicine" was specified for 2978 (91%) of 3268 patients with "PAO" in the department of other specialty under the broad disease category of PPP.

PPP, palmoplantar pustulosis; PAO, pustulotic arthro-osteitis.

**Supplementary Table S3**

Use of healthcare service in each of 12 months during the study period in patients with psoriasis and PPP subdivided by the department in a claim with diagnosis code of psoriasis and PPP in Japanese National Database

| Year and Month          | All            |       | Dermatology<br>or rheumatology<br>(subgroup A) |       | Other<br>specialty<br>(subgroup B) |       | Department<br>not specified<br>(subgroup C) |       |
|-------------------------|----------------|-------|------------------------------------------------|-------|------------------------------------|-------|---------------------------------------------|-------|
|                         | N <sup>b</sup> | %     | N <sup>b</sup>                                 | %     | N <sup>b</sup>                     | %     | N <sup>b</sup>                              | %     |
| Patients with Psoriasis |                |       |                                                |       |                                    |       |                                             |       |
| 2010 April              | 155,927        | 36.3  | 57,385                                         | 43.4  | 15,271                             | 45.2  | 83,271                                      | 31.6  |
| 2010 May                | 157,238        | 36.6  | 57,029                                         | 43.1  | 14,884                             | 44.1  | 85,325                                      | 32.4  |
| 2010 June               | 166,483        | 38.7  | 59,989                                         | 45.4  | 15,409                             | 45.6  | 91,085                                      | 34.5  |
| 2010 July               | 168,831        | 39.3  | 60,186                                         | 45.5  | 15,495                             | 45.9  | 93,150                                      | 35.3  |
| 2010 August             | 161,494        | 37.6  | 59,172                                         | 44.8  | 14,974                             | 44.4  | 87,348                                      | 33.1  |
| 2010 September          | 162,322        | 37.8  | 59,257                                         | 44.8  | 15,182                             | 45.0  | 87,883                                      | 33.3  |
| 2010 October            | 167,886        | 39.1  | 59,960                                         | 45.4  | 15,148                             | 44.9  | 92,778                                      | 35.2  |
| 2010 November           | 168,288        | 39.2  | 60,074                                         | 45.4  | 15,295                             | 45.3  | 92,919                                      | 35.2  |
| 2010 December           | 176,910        | 41.2  | 62,093                                         | 47.0  | 15,562                             | 46.1  | 99,255                                      | 37.6  |
| 2011 January            | 164,580        | 38.3  | 59,920                                         | 45.3  | 15,067                             | 44.6  | 89,593                                      | 34.0  |
| 2011 February           | 165,743        | 38.6  | 58,425                                         | 44.2  | 14,937                             | 44.2  | 92,381                                      | 35.0  |
| 2011 March              | 177,900        | 41.4  | 62,591                                         | 47.3  | 15,968                             | 47.3  | 99,341                                      | 37.7  |
| Total                   | 429,679        | 100.0 | 132,189                                        | 100.0 | 33,763                             | 100.0 | 263,727                                     | 100.0 |

Supplementary Table S3 -- continued

| Year and Month    | All            |       | Dermatology<br>or rheumatology<br>(subgroup A) |       | Other<br>specialty<br>(subgroup B) |       | Department<br>not specified<br>(subgroup C) |       |
|-------------------|----------------|-------|------------------------------------------------|-------|------------------------------------|-------|---------------------------------------------|-------|
|                   | N <sup>b</sup> | %     | N <sup>b</sup>                                 | %     | N <sup>b</sup>                     | %     | N <sup>b</sup>                              | %     |
| Patients with PPP |                |       |                                                |       |                                    |       |                                             |       |
| 2010 April        | 41,825         | 30.7  | 9,388                                          | 34.5  | 4,747                              | 38.2  | 27,690                                      | 28.7  |
| 2010 May          | 45,888         | 33.7  | 9,912                                          | 36.4  | 4,523                              | 36.4  | 31,453                                      | 32.6  |
| 2010 June         | 52,193         | 38.3  | 11,172                                         | 41.1  | 5,045                              | 40.6  | 35,976                                      | 37.2  |
| 2010 July         | 55,463         | 40.7  | 11,508                                         | 42.3  | 5,126                              | 41.3  | 38,829                                      | 10.2  |
| 2010 August       | 52,850         | 38.8  | 11,329                                         | 41.7  | 4,903                              | 39.5  | 36,618                                      | 37.9  |
| 2010 September    | 52,649         | 38.6  | 11,375                                         | 41.8  | 5,065                              | 40.8  | 36,209                                      | 37.5  |
| 2010 October      | 52,229         | 38.3  | 11,193                                         | 41.2  | 4,988                              | 40.2  | 36,048                                      | 37.3  |
| 2010 November     | 48,962         | 35.9  | 10,464                                         | 38.5  | 4,753                              | 38.3  | 33,745                                      | 34.9  |
| 2010 December     | 49,679         | 36.5  | 10,606                                         | 39.0  | 4,757                              | 38.3  | 34,316                                      | 35.5  |
| 2011 January      | 43,971         | 32.3  | 9,801                                          | 36.0  | 4,432                              | 35.7  | 29,738                                      | 30.8  |
| 2011 February     | 44,373         | 32.6  | 9,603                                          | 35.3  | 4,461                              | 35.9  | 30,309                                      | 31.4  |
| 2011 March        | 47,678         | 35.0  | 10,289                                         | 37.8  | 4,716                              | 38.0  | 32,673                                      | 33.8  |
| Total             | 136,224        | 100.0 | 27,195                                         | 100.0 | 12,411                             | 100.0 | 96,618                                      | 100.0 |

a Patients with at least one claim with diagnosis code of psoriasis or PPP where the department was specified as either dermatology or rheumatology (“Dermatology or rheumatology”) or other specialty but not dermatology or rheumatology (“Other specialty”) during the 12-month observation period.

b Number of patients with a claim with a diagnosis code of psoriasis or PPP. PPP, palmoplantar pustulosis.



## Supplementary Table S4

Seasonal variation of use of healthcare service in patients with a diagnosis code of psoriasis and PPP in Japanese National Database

|                                                                     | Use of health-care service |                             | Psoriasis                |       | PPP                  |       |
|---------------------------------------------------------------------|----------------------------|-----------------------------|--------------------------|-------|----------------------|-------|
|                                                                     | 2010 July<br>or August     | 2011 January<br>or February | N <sup>a</sup>           | %     | N <sup>a</sup>       | %     |
| All patients                                                        |                            |                             |                          |       |                      |       |
| Yes                                                                 | Yes                        |                             | 147,254                  | 34.3  | 41,153               | 30.2  |
| Yes                                                                 | No                         |                             | 78,956                   | 18.4  | 34,229               | 25.1  |
| No                                                                  | Yes                        |                             | 80,384                   | 18.7  | 20,548               | 15.1  |
| No                                                                  | No                         |                             | 123,085                  | 28.6  | 40,294               | 29.6  |
| Total                                                               |                            |                             | 429,679                  | 100.0 | 136,224              | 100.0 |
| Difference (95% CI) <sup>b</sup>                                    |                            |                             | -0.33% (-0.51 to -0.15%) |       | 10.0% (9.8 to 10.3%) |       |
| P value <sup>c</sup>                                                |                            |                             | 0.0004                   |       | <0.0001              |       |
| Patients of dermatology or rheumatology (subgroup A) <sup>d</sup>   |                            |                             |                          |       |                      |       |
| Yes                                                                 | Yes                        |                             | 58,962                   | 44.6  | 9,905                | 36.4  |
| Yes                                                                 | No                         |                             | 22,384                   | 16.9  | 6,267                | 23.0  |
| No                                                                  | Yes                        |                             | 22,328                   | 16.9  | 4,164                | 15.3  |
| No                                                                  | No                         |                             | 28,515                   | 21.6  | 6,859                | 25.2  |
| Total                                                               |                            |                             | 132,189                  | 100.0 | 27,195               | 100.0 |
| Difference (95% CI) <sup>b</sup>                                    |                            |                             | 0.04% (-0.27 to 0.36%)   |       | 7.7% (7.1 to 8.4%)   |       |
| P value <sup>c</sup>                                                |                            |                             | 0.79                     |       | <0.0001              |       |
| Patients of department of other specialty (subgroup B) <sup>e</sup> |                            |                             |                          |       |                      |       |
| Yes                                                                 | Yes                        |                             | 14,223                   | 42.1  | 4,596                | 37.0  |
| Yes                                                                 | No                         |                             | 5,714                    | 16.9  | 2,615                | 21.1  |
| No                                                                  | Yes                        |                             | 5,497                    | 16.3  | 1,790                | 14.4  |
| No                                                                  | No                         |                             | 8,329                    | 24.7  | 3,410                | 27.5  |
| Total                                                               |                            |                             | 33,763                   | 100.0 | 12,411               | 100.0 |
| Difference (95% CI) <sup>b</sup>                                    |                            |                             | 0.64% (0.03 to 1.25%)    |       | 6.6% (5.7 to 7.6%)   |       |
| P value <sup>c</sup>                                                |                            |                             | 0.04                     |       | <0.0001              |       |

Supplementary Table S4 --- continued

| Use of health-care service                                     |                             | Psoriasis                |       | PPP                   |       |
|----------------------------------------------------------------|-----------------------------|--------------------------|-------|-----------------------|-------|
| 2010 July<br>or August                                         | 2011 January<br>or February | N <sup>a</sup>           | %     | N <sup>a</sup>        | %     |
| Patients of department not specified (subgroup C) <sup>f</sup> |                             |                          |       |                       |       |
| Yes                                                            | Yes                         | 74,069                   | 32.7  | 26,652                | 27.6  |
| Yes                                                            | No                          | 50,858                   | 19.9  | 25,347                | 26.2  |
| No                                                             | Yes                         | 52,559                   | 19.3  | 14,594                | 15.1  |
| No                                                             | No                          | 86,241                   | 28.0  | 30,025                | 31.1  |
| Total                                                          |                             | 263,727                  | 100.0 | 96,618                | 100.0 |
| Difference (95% CI) <sup>b</sup>                               |                             | -0.64% (-0.88 to -0.40%) |       | 11.1% (10.8 to 11.5%) |       |
| P value <sup>b</sup>                                           |                             | <0.0001                  |       | <0.0001               |       |

a Number of patients with a claim with a diagnosis code of psoriasis or PPP.

b Difference between the proportion of patients who used the healthcare service in the hottest season (July or August 2010) and the proportion of patients who used the service in the coldest season (January or February of 2011).

c The result of paired t-test is shown.

d Patients with at least one claim with diagnosis code of psoriasis or PPP where the department was specified as dermatology or rheumatology during the 12-month observation period.

e Patients with a diagnosis code of psoriasis or PPP where the department was specified as other specialty but not as dermatology or rheumatology.

f Patients with a diagnosis code of psoriasis or PPP where the department was not specified.

PPP, palmoplantar pustulosis.

## Supplementary Table S5

Treatments for psoriasis and PPP subdivided by the department specified in a claim with a diagnosis code of psoriasis and PPP in Japanese National Database

|                        | Psoriasis         |                   |                        |                 | PPP               |                  |                |                |
|------------------------|-------------------|-------------------|------------------------|-----------------|-------------------|------------------|----------------|----------------|
|                        |                   | Male              | Psoriatic<br>arthritis |                 |                   | Male             | PAO            |                |
|                        | N <sup>a</sup>    | N                 | Age                    | N               | N <sup>a</sup>    | N                | Age            | N              |
|                        | (%)               | (%)               | (SD)                   | (%)             | (%)               | (%)              | (SD)           | (%)            |
| All patients           | N=429,679         |                   |                        |                 | N=136,224         |                  |                |                |
| Systemic therapy       |                   |                   |                        |                 |                   |                  |                |                |
| Biologics              | 3,291<br>(0.8)    | 2,132<br>(64.8)   | 48.9<br>(14.1)         | 1,111<br>(33.8) | 253<br>(0.2)      | 65<br>(25.7)     | 53.2<br>(13.6) | 20<br>(7.9)    |
| Methotrexate           | 1,680<br>(0.4)    | 1,072<br>(63.8)   | 52.0<br>(15.5)         | 480<br>(28.6)   | 174<br>(0.1)      | 53<br>(30.5)     | 54.6<br>(13.4) | 19<br>(10.9)   |
| Ciclosporin            | 21,997<br>(5.1)   | 13,813<br>(62.8)  | 53.2<br>(16.2)         | 1,604<br>(7.3)  | 251<br>(0.2)      | 98<br>(39.0)     | 52.9<br>(13.8) | 20<br>(8.0)    |
| Etretinate             | 15,481<br>(3.6)   | 11,025<br>(71.2)  | 60.1<br>(13.6)         | 609<br>(3.9)    | 1,950<br>(1.4)    | 725<br>(37.2)    | 57.5<br>(11.7) | 35<br>(1.8)    |
| Phototherapy           | 21,005<br>(4.9)   | 12,370<br>(58.9)  | 54.6<br>(18.1)         | 309<br>(1.5)    | 10,408<br>(7.6)   | 3,657<br>(35.1)  | 53.3<br>(15.0) | 156<br>(1.5)   |
| Topical therapy        |                   |                   |                        |                 |                   |                  |                |                |
| Topical vitamin D      | 256,122<br>(59.6) | 156,050<br>(60.9) | 53.4<br>(18.5)         | 3,698<br>(1.4)  | 42,903<br>(31.5)  | 14,276<br>(33.3) | 53.0<br>(14.9) | 612<br>(1.4)   |
| Topical corticosteroid | 349,568<br>(81.4) | 211,744<br>(60.6) | 54.9<br>(18.1)         | 5,323<br>(1.5)  | 109,692<br>(80.5) | 37,881<br>(34.5) | 53.4<br>(15.3) | 3,576<br>(3.3) |
| No treatment           | 38,224<br>(8.9)   | 19,393<br>(50.7)  | 58.6<br>(19.5)         | 1,851<br>(4.8)  | 21,209<br>(15.6)  | 7,527<br>(35.5)  | 54.6<br>(16.2) | 2,083<br>(9.8) |

Supplementary Table S5 --- continued

|                                                                   | Psoriasis         |                  |                |                | PPP              |                 |                |              |
|-------------------------------------------------------------------|-------------------|------------------|----------------|----------------|------------------|-----------------|----------------|--------------|
|                                                                   | N <sup>a</sup>    | Male             | Psoriatic      |                | N <sup>a</sup>   | Male            | PAO            |              |
|                                                                   |                   |                  | Age            | N              |                  |                 | Age            | N            |
| (%)                                                               | (%)               | (SD)             | (%)            | (%)            | (%)              | (SD)            | (%)            |              |
| Patients of dermatology or rheumatology (subgroup A) <sup>b</sup> |                   |                  |                |                |                  |                 |                |              |
|                                                                   | N=132,189         |                  |                |                | N=27,195         |                 |                |              |
| Systemic therapy                                                  |                   |                  |                |                |                  |                 |                |              |
| Biologics                                                         | 2,674<br>(2.0)    | 1,827<br>(68.3)  | 48.4<br>(13.8) | 895<br>(33.5)  | 112<br>(0.4)     | 28<br>(25.0)    | 54.5<br>(11.9) | --c          |
| Methotrexate                                                      | 681<br>(0.5)      | 436<br>(64.0)    | 51.1<br>(15.6) | 280<br>(41.1)  | 67<br>(0.2)      | 14<br>(20.9)    | 51.8<br>(13.0) | 13<br>(19.4) |
| Ciclosporin                                                       | 12,330<br>(9.3)   | 7,917<br>(64.2)  | 52.8<br>(15.8) | 1,023<br>(8.3) | 109<br>(0.4)     | 37<br>(33.9)    | 54.4<br>(11.9) | --c          |
| Etretinate                                                        | 9,010<br>(6.8)    | 6,387<br>(70.9)  | 60.6<br>(13.5) | 501<br>(5.6)   | 744<br>(2.7)     | 271<br>(36.4)   | 57.4<br>(10.7) | 26<br>(3.5)  |
| Phototherapy                                                      | 5,465<br>(4.1)    | 3,352<br>(61.3)  | 56.4<br>(16.9) | 181<br>(3.3)   | 1,529<br>(5.6)   | 498<br>(32.6)   | 53.9<br>(14.2) | 43<br>(2.8)  |
| Topical therapy                                                   |                   |                  |                |                |                  |                 |                |              |
| Topical vitamin D                                                 | 86,201<br>(65.2)  | 54,802<br>(63.6) | 55.9<br>(17.7) | 2,736<br>(3.2) | 11,194<br>(41.2) | 3,737<br>(33.4) | 54.9<br>(14.0) | 365<br>(3.3) |
| Topical corticosteroid                                            | 112,813<br>(85.3) | 70,655<br>(62.6) | 56.8<br>(17.3) | 3,580<br>(3.2) | 23,415<br>(86.1) | 8,006<br>(34.2) | 55.3<br>(14.3) | 623<br>(2.7) |
| No treatment                                                      | 7,621<br>(5.8)    | 3,809<br>(50.0)  | 54.8<br>(19.7) | 448<br>(5.9)   | 2,732<br>(10.0)  | 941<br>(34.4)   | 55.3<br>(14.5) | 114<br>(4.2) |

Supplementary Table S5 --- continued

|                                                                  | Psoriasis             |                  |                        |               | PPP                   |                 |                |                 |
|------------------------------------------------------------------|-----------------------|------------------|------------------------|---------------|-----------------------|-----------------|----------------|-----------------|
|                                                                  | N <sup>a</sup><br>(%) | Male             | Psoriatic<br>arthritis |               | N <sup>a</sup><br>(%) | Male            | PAO            |                 |
|                                                                  |                       | N<br>(%)         | Age<br>(SD)            | N<br>(%)      |                       | N<br>(%)        | Age<br>(SD)    | N<br>(%)        |
| Patients of department other specialty (subgroup B) <sup>d</sup> |                       |                  |                        |               |                       |                 |                |                 |
|                                                                  | N=33,763              |                  |                        |               | N=12,411              |                 |                |                 |
| Systemic therapy                                                 |                       |                  |                        |               |                       |                 |                |                 |
| Biologics                                                        | 294<br>(0.9)          | 163<br>(55.4)    | 49.5<br>(15.0)         | 155<br>(52.7) | 51<br>(0.4)           | 12<br>(23.5)    | 51.9<br>(11.8) | 11<br>(21.6)    |
| Methotrexate                                                     | 265<br>(0.8)          | 146<br>(55.1)    | 50.3<br>(16.3)         | 133<br>(50.2) | 38<br>(0.3)           | 15<br>(39.5)    | 56.7<br>(11.9) | -- <sup>c</sup> |
| Ciclosporin                                                      | 2,474<br>(7.3)        | 1,247<br>(50.4)  | 57.5<br>(16.0)         | 350<br>(14.1) | 38<br>(0.3)           | 13<br>(34.2)    | 54.1<br>(16.2) | 10<br>(26.3)    |
| Etretinate                                                       | 650<br>(1.9)          | 462<br>(71.1)    | 63.3<br>(13.5)         | 27<br>(4.2)   | 72<br>(0.6)           | 21<br>(29.2)    | 57.1<br>(11.8) | -- <sup>c</sup> |
| Phototherapy                                                     | 689<br>(2.0)          | 415<br>(60.2)    | 61.0<br>(16.7)         | 36<br>(5.2)   | 386<br>(3.1)          | 135<br>(35.0)   | 54.1<br>(14.8) | 74<br>(19.2)    |
| Topical therapy                                                  |                       |                  |                        |               |                       |                 |                |                 |
| Topical vitamin D                                                | 11,608<br>(34.4)      | 7,379<br>(63.6)  | 58.6<br>(17.3)         | 391<br>(3.4)  | 1,832<br>(14.8)       | 579<br>(31.6)   | 54.3<br>(14.7) | 153<br>(8.4)    |
| Topical corticosteroid                                           | 19,804<br>(58.7)      | 12,008<br>(60.6) | 59.1<br>(18.4)         | 869<br>(4.4)  | 7,037<br>(56.7)       | 2,304<br>(32.7) | 54.1<br>(15.7) | 1,858<br>(26.4) |
| No treatment                                                     | 9,906<br>(29.3)       | 5,121<br>(51.7)  | 62.1<br>(17.0)         | 921<br>(9.3)  | 5,005<br>(40.3)       | 1,735<br>(34.7) | 55.9<br>(14.9) | 1,391<br>(27.8) |

Supplementary Table S5 --- continued

|                                                                | Psoriasis             |                   |                        |              | PPP                   |                  |                |                |
|----------------------------------------------------------------|-----------------------|-------------------|------------------------|--------------|-----------------------|------------------|----------------|----------------|
|                                                                | N <sup>a</sup><br>(%) | Male              | Psoriatic<br>arthritis |              | N <sup>a</sup><br>(%) | Male             | PAO            |                |
|                                                                |                       | N<br>(%)          | Age<br>(SD)            | N<br>(%)     |                       | N<br>(%)         | Age<br>(SD)    | N<br>(%)       |
| Patients of department not specified (subgroup C) <sup>e</sup> |                       |                   |                        |              |                       |                  |                |                |
|                                                                | N=263,727             |                   |                        |              | N=96,618              |                  |                |                |
| Systemic therapy                                               |                       |                   |                        |              |                       |                  |                |                |
| Biologics                                                      | 323<br>(0.1)          | 142<br>(44.0)     | 52.5<br>(15.0)         | 61<br>(18.9) | 90<br>(0.1)           | 25<br>(27.8)     | 52.3<br>(16.3) | --c            |
| Methotrexate                                                   | 734<br>(0.3)          | 490<br>(66.8)     | 53.5<br>(15.0)         | 67<br>(9.1)  | 69<br>(0.1)           | 24<br>(34.8)     | 56.2<br>(14.3) | --c            |
| Ciclosporin                                                    | 7,193<br>(2.7)        | 4,649<br>(64.6)   | 52.4<br>(16.7)         | 231<br>(3.2) | 104<br>(0.1)          | 48<br>(46.2)     | 50.8<br>(14.5) | --c            |
| Etretinate                                                     | 5,821<br>(2.2)        | 4,176<br>(71.7)   | 59.0<br>(13.6)         | 81<br>(1.4)  | 1,134<br>(1.2)        | 433<br>(38.2)    | 57.6<br>(12.4) | --c            |
| Phototherapy                                                   | 14,851<br>(5.6)       | 8,603<br>(57.9)   | 53.6<br>(18.5)         | 92<br>(0.6)  | 8,493<br>(8.8)        | 3,024<br>(35.6)  | 53.1<br>(15.1) | 39<br>(0.5)    |
| Topical therapy                                                |                       |                   |                        |              |                       |                  |                |                |
| Topical vitamin D                                              | 158,313<br>(60.0)     | 93,869<br>(59.3)  | 51.6<br>(18.8)         | 571<br>(0.4) | 29,877<br>(30.9)      | 9,960<br>(33.3)  | 52.2<br>(15.1) | 94<br>(0.3)    |
| Topical corticosteroid                                         | 216,951<br>(82.3)     | 129,081<br>(59.5) | 53.5<br>(18.3)         | 874<br>(0.4) | 79,240<br>(82.0)      | 27,571<br>(34.8) | 52.8<br>(15.4) | 1,095<br>(1.4) |
| No treatment                                                   | 20,697<br>(7.8)       | 10,463<br>(50.6)  | 58.3<br>(20.3)         | 482<br>(2.3) | 13,472<br>(13.9)      | 4,851<br>(36.0)  | 53.9<br>(16.9) | 578<br>(4.3)   |

1  
2  
3  
4  
5 Supplementary Table S5 -- continued

6 a One patient is counted once for each treatment.

7  
8 b Patients with at least one claim with a diagnosis code of psoriasis or PPP where the  
9 department was specified as dermatology or rheumatology during the 12-month  
10 observation period.

11 c Less than 10 patients had the treatment.

12 d Patients with a diagnosis code of psoriasis or PPP where the department was specified as  
13 other specialty but not as dermatology or rheumatology.

14 e Patients with a diagnosis code of psoriasis or PPP where the department was not  
15 specified.

16  
17 PPP, palmoplantar pustulosis; PAO, pustulotic arthro-osteitis.  
18  
19  
20  
21  
22  
23  
24  
25  
26  
27  
28  
29  
30  
31  
32  
33  
34  
35  
36  
37  
38  
39  
40  
41  
42  
43  
44  
45  
46  
47  
48  
49  
50  
51  
52  
53  
54  
55  
56  
57  
58  
59  
60

## Supplementary Table S6

Prevalence of diabetes mellitus, hyperlipidemia and hypertension in severity classes I to IV of patients with psoriasis and PPP subdivided by the department specified in the claim in Japanese National Database

|                                     | All patients |            | Patients of dermatol or rheumatol <sup>a</sup><br>(subgroup A) |            | Patients of other department <sup>b</sup><br>(subgroup B) |             | Patients of department not specified <sup>c</sup><br>(subgroup C) |            |
|-------------------------------------|--------------|------------|----------------------------------------------------------------|------------|-----------------------------------------------------------|-------------|-------------------------------------------------------------------|------------|
|                                     | Psoriasis    | PPP        | Psoriasis                                                      | PPP        | Psoriasis                                                 | PPP         | Psoriasis                                                         | PPP        |
| Severity Class I (systemic therapy) |              |            |                                                                |            |                                                           |             |                                                                   |            |
| Total N                             | 39,796       | 2,588      | 22,641                                                         | 1,009      | 3,520                                                     | 194         | 13,635                                                            | 1,385      |
| Diabetes mellitus                   |              |            |                                                                |            |                                                           |             |                                                                   |            |
| N <sup>d</sup>                      | 5,271        | 260        | 3,121                                                          | 111        | 747                                                       | 21          | 1,403                                                             | 128        |
| Prevalence <sup>e</sup> (%)         | 12.7         | 9.3        | 13.2                                                           | 11.2       | 19.4                                                      | 10.9        | 9.5                                                               | 7.7        |
| Difference <sup>f</sup> (%)         | 3.1          | 0.8        | 2.1                                                            | 1.2        | 5.8                                                       | -0.6        | 1.4                                                               | 0.3        |
| (95%CI)                             | (2.7,3.4)    | (-0.5,2.1) | (1.6,2.5)                                                      | (-1.4,3.9) | (4.5,7.1)                                                 | (-5.8,4.6)  | (0.9,1.9)                                                         | (-1.1,1.8) |
| Hyperlipidemia                      |              |            |                                                                |            |                                                           |             |                                                                   |            |
| N <sup>d</sup>                      | 8,208        | 557        | 4,725                                                          | 239        | 1,003                                                     | 32          | 2,480                                                             | 286        |
| Prevalence <sup>e</sup> (%)         | 20.7         | 18.3       | 21.1                                                           | 20.2       | 25.1                                                      | 15.3        | 17.6                                                              | 16.6       |
| Difference <sup>f</sup> (%)         | 3.2          | 1.0        | 2.5                                                            | 2.0        | 6.2                                                       | -2.7        | 1.5                                                               | 0.4        |
| (95%CI)                             | (2.8,3.6)    | (-0.6,2.6) | (1.9,3.1)                                                      | (-0.9,5.0) | (4.8,7.7)                                                 | (-8.2,2.8)  | (0.8,2.1)                                                         | (-1.5,2.4) |
| Hypertension                        |              |            |                                                                |            |                                                           |             |                                                                   |            |
| N <sup>d</sup>                      | 11,795       | 576        | 7,150                                                          | 230        | 1,235                                                     | 38          | 3,410                                                             | 308        |
| Prevalence <sup>e</sup> (%)         | 28.5         | 22.4       | 30.5                                                           | 22.7       | 30.8                                                      | 18.9        | 23.2                                                              | 21.6       |
| Difference <sup>f</sup> (%)         | 5.1          | 0.6        | 5.9                                                            | 0.0        | 3.4                                                       | -5.7        | 1.5                                                               | 1.1        |
| (95%CI)                             | (4.7,5.6)    | (-1.0,2.3) | (5.3,6.6)                                                      | (-3.0,3.0) | (1.9,4.9)                                                 | (-11.9,0.5) | (0.8,2.2)                                                         | (-1.0,3.2) |



Supplementary Table S6 -- continued

|                                                           | All patients |             | Patients of<br>dermatol or rheumatol <sup>a</sup> |            | Patients of<br>other department <sup>b</sup> |            | Patients of<br>department not specified <sup>c</sup> |            |
|-----------------------------------------------------------|--------------|-------------|---------------------------------------------------|------------|----------------------------------------------|------------|------------------------------------------------------|------------|
|                                                           | Psoriasis    | PPP         | Psoriasis                                         | PPP        | Psoriasis                                    | PPP        | Psoriasis                                            | PPP        |
| Severity Class II (phototherapy without systemic therapy) |              |             |                                                   |            |                                              |            |                                                      |            |
| Total N                                                   | 18,833       | 10,153      | 4,332                                             | 1,452      | 614                                          | 379        | 13,887                                               | 8,322      |
| Diabetes mellitus                                         |              |             |                                                   |            |                                              |            |                                                      |            |
| N <sup>d</sup>                                            | 1,747        | 686         | 496                                               | 98         | 89                                           | 29         | 1,162                                                | 559        |
| Prevalence <sup>e</sup> (%)                               | 9.0          | 7.7         | 13.2                                              | 11.2       | 12.0                                         | 9.6        | 8.0                                                  | 7.2        |
| Difference <sup>f</sup> (%)                               | -0.6         | -0.8        | 2.1                                               | 1.2        | -1.6                                         | -1.8       | -0.1                                                 | -0.2       |
| (95%CI)                                                   | (-1.0,-0.2)  | (-1.4,-0.2) | (1.6,2.5)                                         | (-1.4,3.9) | (-4.1,0.8)                                   | (-4.9,1.3) | (-0.6,0.3)                                           | (-0.9,0.5) |
| Hyperlipidemia                                            |              |             |                                                   |            |                                              |            |                                                      |            |
| N <sup>d</sup>                                            | 3,125        | 1,731       | 811                                               | 268        | 131                                          | 71         | 2,183                                                | 1,392      |
| Prevalence <sup>e</sup> (%)                               | 16.7         | 17.4        | 21.1                                              | 20.2       | 17.8                                         | 16.9       | 15.5                                                 | 16.5       |
| Difference <sup>f</sup> (%)                               | -0.8         | 0.1         | 2.5                                               | 2.0        | -1.0                                         | -1.1       | -0.6                                                 | 0.3        |
| (95%CI)                                                   | (-1.3,-0.3)  | (-0.7,1.0)  | (1.9,3.1)                                         | (-0.9,5.0) | (-3.9,1.9)                                   | (-5.0,2.8) | (-1.2,0.0)                                           | (-0.6,1.2) |
| Hypertension                                              |              |             |                                                   |            |                                              |            |                                                      |            |
| N <sup>d</sup>                                            | 4,369        | 1,885       | 1,169                                             | 281        | 196                                          | 93         | 3,004                                                | 1,511      |
| Prevalence <sup>e</sup> (%)                               | 22.8         | 21.8        | 30.5                                              | 22.7       | 23.7                                         | 23.6       | 21.3                                                 | 20.7       |
| Difference <sup>f</sup> (%)                               | -0.6         | 0.0         | 5.9                                               | 0.0        | -3.8                                         | -1.0       | -0.5                                                 | 0.3        |
| (95%CI)                                                   | (-1.2,-0.1)  | (-0.9,0.9)  | (5.3,6.6)                                         | (-3.0,3.0) | (-6.6,-0.9)                                  | (-5.2,3.2) | (-1.1,0.2)                                           | (-0.7,1.2) |

Supplementary Table 6 -- continued

|                                           | All patients |         | Patients of<br>dermatol or rheumatol <sup>a</sup><br>(subgroup A) |        | Patients of<br>other department <sup>b</sup><br>(subgroup B) |       | Patients of<br>department not specified <sup>c</sup><br>(subgroup C) |        |
|-------------------------------------------|--------------|---------|-------------------------------------------------------------------|--------|--------------------------------------------------------------|-------|----------------------------------------------------------------------|--------|
|                                           | Psoriasis    | PPP     | Psoriasis                                                         | PPP    | Psoriasis                                                    | PPP   | Psoriasis                                                            | PPP    |
| Severity Class III (topical therapy only) |              |         |                                                                   |        |                                                              |       |                                                                      |        |
| Total N                                   | 332,826      | 102,274 | 97,595                                                            | 22,002 | 19,723                                                       | 6,833 | 215,508                                                              | 73,439 |
| Diabetes mellitus                         |              |         |                                                                   |        |                                                              |       |                                                                      |        |
| N <sup>d</sup>                            | 32,378       | 7,583   | 11,886                                                            | 2,141  | 2,985                                                        | 725   | 17,507                                                               | 4,717  |
| Prevalence <sup>e</sup> (%)               | 9.6          | 8.5     | 11.1                                                              | 10.0   | 13.6                                                         | 11.5  | 8.2                                                                  | 7.4    |
| Difference <sup>f</sup> (%)               | ref          | ref     | ref                                                               | ref    | ref                                                          | ref   | ref                                                                  | ref    |
| Hyperlipidemia                            |              |         |                                                                   |        |                                                              |       |                                                                      |        |
| N <sup>d</sup>                            | 56,561       | 17,783  | 19,006                                                            | 4,434  | 4,206                                                        | 1,315 | 33,289                                                               | 12,034 |
| Prevalence <sup>e</sup> (%)               | 17.5         | 17.3    | 18.6                                                              | 18.2   | 18.9                                                         | 18.0  | 16.1                                                                 | 16.2   |
| Difference <sup>f</sup> (%)               | ref          | ref     | ref                                                               | ref    | ref                                                          | ref   | ref                                                                  | ref    |
| Hypertension                              |              |         |                                                                   |        |                                                              |       |                                                                      |        |
| N <sup>d</sup>                            | 78,996       | 19,322  | 26,307                                                            | 4,781  | 6,484                                                        | 1,548 | 46,205                                                               | 12,993 |
| Prevalence <sup>e</sup> (%)               | 23.4         | 21.7    | 24.5                                                              | 22.7   | 27.4                                                         | 24.6  | 21.7                                                                 | 20.4   |
| Difference <sup>f</sup> (%)               | ref          | ref     | ref                                                               | ref    | ref                                                          | ref   | ref                                                                  | ref    |

Supplementary Table S6 -- continued

|                                  | All patients |           | Patients of<br>dermatol or rheumatol <sup>a</sup> |            | Patients of<br>other department <sup>b</sup> |            | Patients of<br>department not specified <sup>c</sup> |           |
|----------------------------------|--------------|-----------|---------------------------------------------------|------------|----------------------------------------------|------------|------------------------------------------------------|-----------|
|                                  | Psoriasis    | PPP       | Psoriasis                                         | PPP        | Psoriasis                                    | PPP        | Psoriasis                                            | PPP       |
| Severity Class IV (No treatment) |              |           |                                                   |            |                                              |            |                                                      |           |
| Total N                          | 38,224       | 21,209    | 7,621                                             | 2,732      | 9,906                                        | 5,005      | 20,697                                               | 13,472    |
| Diabetes mellitus                |              |           |                                                   |            |                                              |            |                                                      |           |
| N <sup>d</sup>                   | 4,669        | 2,061     | 808                                               | 261        | 1,676                                        | 622        | 2,185                                                | 1,178     |
| Prevalence <sup>e</sup> (%)      | 11.5         | 10.4      | 10.6                                              | 10.1       | 15.1                                         | 13.0       | 9.6                                                  | 9.1       |
| Difference <sup>f</sup> (%)      | 1.9          | 2.0       | -0.6                                              | 0.1        | 1.5                                          | 1.5        | 1.4                                                  | 1.7       |
| (95%CI)                          | (1.6,2.2)    | (1.5,2.4) | (-1.3,0.1)                                        | (-1.2,1.5) | (0.6,2.4)                                    | (0.2,2.8)  | (1.0,1.8)                                            | (1.2,2.3) |
| Hyperlipidemia                   |              |           |                                                   |            |                                              |            |                                                      |           |
| N <sup>d</sup>                   | 7,771        | 4,283     | 1,318                                             | 536        | 2,340                                        | 1,087      | 4,113                                                | 2,660     |
| Prevalence <sup>e</sup> (%)      | 18.9         | 18.6      | 16.7                                              | 17.7       | 19.8                                         | 18.6       | 18.0                                                 | 17.7      |
| Difference <sup>f</sup> (%)      | 1.4          | 1.4       | -2.0                                              | -0.4       | 1.0                                          | 0.6        | 1.9                                                  | 1.5       |
| (95%CI)                          | (1.0,1.8)    | (0.8,2.0) | (-2.8,-1.1)                                       | (-2.0,1.1) | (0.1,1.9)                                    | (-0.9,2.1) | (1.4,2.4)                                            | (0.8,2.2) |
| Hypertension                     |              |           |                                                   |            |                                              |            |                                                      |           |
| N <sup>d</sup>                   | 11,061       | 4,786     | 1,675                                             | 572        | 3,547                                        | 1,293      | 5,839                                                | 2,921     |
| Prevalence <sup>e</sup> (%)      | 25.5         | 23.9      | 21.2                                              | 21.8       | 28.6                                         | 25.6       | 24.0                                                 | 22.4      |
| Difference <sup>f</sup> (%)      | 2.1          | 2.1       | -3.4                                              | -0.9       | 1.2                                          | 1.0        | 2.3                                                  | 2.0       |
| (95%CI)                          | (1.7,2.6)    | (1.5,2.8) | (-4.3,-2.5)                                       | (-2.6,0.9) | (0.2,2.2)                                    | (-0.6,2.5) | (1.7,2.8)                                            | (1.2,2.8) |

## Supplementary Table S6 -- continued

a Patients with at least one claim with a diagnosis code of psoriasis or PPP where the department was specified as dermatology or rheumatology during the 12-month observation period.

b Patients with a diagnosis code of psoriasis or PPP where the department was specified as other specialty but not as dermatology or rheumatology.

c Patients with diagnosis code of psoriasis or PPP where the department was not specified.

d Number of patients with a diagnosis code of the concurrent disease (diabetes mellitus, hyperlipidemia or hypertension) at least in one claim as well as a drug to treat the concurrent disease in the claims issued in 2 or more different months.

e Prevalence was standardized to the distribution of age and sex in the entire study population of 565,903 subjects as in Table 4 in the text.

f Difference of the standardized prevalence between the severity classes I, II and IV and the severity class III (topical treatment only) in each department subgroup.

PPP, palmoplantar pustulosis; CI, confidence interval.

STROBE Statement—Checklist of items that should be included in reports of *cross-sectional studies*

|                              | Item No | Recommendation                                                                                                                                                                                                                                                                                                                                                                                                         |
|------------------------------|---------|------------------------------------------------------------------------------------------------------------------------------------------------------------------------------------------------------------------------------------------------------------------------------------------------------------------------------------------------------------------------------------------------------------------------|
| <b>Title and abstract</b>    | 1       | <p>(a) Indicate the study's design with a commonly used term in the title or the abstract<br/>It is indicated that the study is a nationwide study using database though the term "cross-sectional" itself is not used</p> <p>(b) Provide in the abstract an informative and balanced summary of what was done and what was found<br/>In the abstract, the study is summarized in an informative and balanced way.</p> |
| <b>Introduction</b>          |         |                                                                                                                                                                                                                                                                                                                                                                                                                        |
| Background/rationale         | 2       | Explain the scientific background and rationale for the investigation being reported<br>Epidemiology of psoriasis/ palmoplantar pustulosis (PPP) in the Western countries and Asia are outlined and the current status of the secondary use of National Database in Japan is mentioned.                                                                                                                                |
| Objectives                   | 3       | State specific objectives, including any prespecified hypotheses<br>This study is descriptive and the objective "to study national prevalence of psoriasis and PPP" is given clearly.                                                                                                                                                                                                                                  |
| <b>Methods</b>               |         |                                                                                                                                                                                                                                                                                                                                                                                                                        |
| Study design                 | 4       | Present key elements of study design early in the paper<br>It is given that we did a descriptive study using database covering whole nation                                                                                                                                                                                                                                                                            |
| Setting                      | 5       | Describe the setting, locations, and relevant dates, including periods of recruitment, exposure, follow-up, and data collection<br>It is given that data for 12-month period (with specified dates) was extracted from Japanese national database to obtain data of patients with psoriasis/PPP.                                                                                                                       |
| Participants                 | 6       | (a) Give the eligibility criteria, and the sources and methods of selection of participants<br>It is given that all the patients were identified by the ICD-10 diagnosis code.                                                                                                                                                                                                                                         |
| Variables                    | 7       | Clearly define all outcomes, exposures, predictors, potential confounders, and effect modifiers. Give diagnostic criteria, if applicable<br>This is the descriptive study and all the attributes of the patients examined including age, sex, use of health care service, treatments for psoriasis/PPP, comorbidities are specified.                                                                                   |
| Data sources/<br>measurement | 8*      | For each variable of interest, give sources of data and details of methods of assessment (measurement). Describe comparability of assessment methods if there is more than one group<br>All the data were obtained from the database and codes for diagnoses, drugs and other treatments used in the study are specified.                                                                                              |
| Bias                         | 9       | Describe any efforts to address potential sources of bias<br>One of major possible biases is misclassification of psoriasis/PPP particularly when the diagnosis was made by non-specialist. It is given that we collected the specialty of the department in a claim with a diagnosis code of psoriasis and PPP issued from a hospital or clinic.                                                                      |
| Study size                   | 10      | Explain how the study size was arrived at<br>We did not give sample size calculation as this is the descriptive study to estimate national prevalence of psoriasis/PPP using database covering the whole nation.                                                                                                                                                                                                       |
| Quantitative variables       | 11      | Explain how quantitative variables were handled in the analyses. If applicable, describe which groupings were chosen and why                                                                                                                                                                                                                                                                                           |

|                     |     |                                                                                                                                                                                                                                                                                                                                                                                                                                                                                                                                                                                                                                                                                                                                                                                                                                                                                                                                                                                                                                                                                                 |
|---------------------|-----|-------------------------------------------------------------------------------------------------------------------------------------------------------------------------------------------------------------------------------------------------------------------------------------------------------------------------------------------------------------------------------------------------------------------------------------------------------------------------------------------------------------------------------------------------------------------------------------------------------------------------------------------------------------------------------------------------------------------------------------------------------------------------------------------------------------------------------------------------------------------------------------------------------------------------------------------------------------------------------------------------------------------------------------------------------------------------------------------------|
|                     |     | We gave how quantitative variables were handled clearly in the section of statistical analysis including subgroups used in the study.                                                                                                                                                                                                                                                                                                                                                                                                                                                                                                                                                                                                                                                                                                                                                                                                                                                                                                                                                           |
| Statistical methods | 12  | <p>(a) Describe all statistical methods, including those used to control for confounding</p> <p>In the comparison of comorbidities between subclasses according to severity, in the supplementary tables, we stratified the data by the specialty of the department. It is also clearly given that we used McNemar test to examine the seasonal variation of the use of health care service.</p> <p>(b) Describe any methods used to examine subgroups and interactions</p> <p>It is given that we examined subgroups classified by the specialty of the department.</p> <p>(c) Explain how missing data were addressed</p> <p>In this study using the national database, no information is available suggesting potential missing variables and the issue of missing data is not addressed.</p> <p>(d) If applicable, describe analytical methods taking account of sampling strategy</p> <p>The study is to cover the whole nation and this issue is not applicable.</p> <p>(e) Describe any sensitivity analyses</p> <p>In this descriptive study, no sensitivity analysis is conducted.</p> |
| <b>Results</b>      |     |                                                                                                                                                                                                                                                                                                                                                                                                                                                                                                                                                                                                                                                                                                                                                                                                                                                                                                                                                                                                                                                                                                 |
| Participants        | 13* | <p>(a) Report numbers of individuals at each stage of study—eg numbers potentially eligible, examined for eligibility, confirmed eligible, included in the study, completing follow-up, and analysed</p> <p>In this study using national database, there was no “stage” which might be seen in the study using the primary data.</p> <p>(b) Give reasons for non-participation at each stage</p> <p>In this database study, no non-participation occurred.</p> <p>(c) Consider use of a flow diagram</p> <p>Due to the nature of the study, we did not judge it is needed to use a flow diagram.</p>                                                                                                                                                                                                                                                                                                                                                                                                                                                                                            |
| Descriptive data    | 14* | <p>(a) Give characteristics of study participants (eg demographic, clinical, social) and information on exposures and potential confounders</p> <p>We gave the basic characteristics in Table 1 and Figure 1.</p> <p>(b) Indicate number of participants with missing data for each variable of interest</p> <p>In this study, no information is available suggesting potential missing variables and we could not show the number of subjects with missing data.</p>                                                                                                                                                                                                                                                                                                                                                                                                                                                                                                                                                                                                                           |
| Outcome data        | 15* | <p>Report numbers of outcome events or summary measures</p> <p>Though this study is descriptive, comorbidity may be regarded as one of “outcomes” and the number is summarized in Table 4.</p>                                                                                                                                                                                                                                                                                                                                                                                                                                                                                                                                                                                                                                                                                                                                                                                                                                                                                                  |
| Main results        | 16  | <p>(a) Give unadjusted estimates and, if applicable, confounder-adjusted estimates and their precision (eg, 95% confidence interval). Make clear which confounders were adjusted for and why they were included</p> <p>Estimates of the proportion are given with 95% confidence interval. As “confounding” is not an issue in this study, no data after “adjustment” is shown though we showed results when stratified by the specialty of the department and other variables used to make subclasses.</p> <p>(b) Report category boundaries when continuous variables were categorized</p> <p>This occurred for age which was given as 5-year age band and the boundaries are clearly given in the manuscript.</p> <p>(c) If relevant, consider translating estimates of relative risk into absolute risk for a meaningful time period</p>                                                                                                                                                                                                                                                    |

|                          |    |                                                                                                                                                                                                                                                                                                                                   |
|--------------------------|----|-----------------------------------------------------------------------------------------------------------------------------------------------------------------------------------------------------------------------------------------------------------------------------------------------------------------------------------|
|                          |    | In this descriptive study, this issue of relative/absolute risk is not relevant.                                                                                                                                                                                                                                                  |
| Other analyses           | 17 | Report other analyses done—eg analyses of subgroups and interactions, and sensitivity analyses<br>In supplementary tables, the results in subgroups subdivided by the specialty of the department with or without further stratification by the additional variable (e.g., severity of disease) are shown.                        |
| <b>Discussion</b>        |    |                                                                                                                                                                                                                                                                                                                                   |
| Key results              | 18 | Summarise key results with reference to study objectives<br>Main result or prevalence of psoriasis/PPP is summarized.                                                                                                                                                                                                             |
| Limitations              | 19 | Discuss limitations of the study, taking into account sources of potential bias or imprecision. Discuss both direction and magnitude of any potential bias<br>Main limitation due to the lack of validation study is emphasized.                                                                                                  |
| Interpretation           | 20 | Give a cautious overall interpretation of results considering objectives, limitations, multiplicity of analyses, results from similar studies, and other relevant evidence<br>Interpretation is made cautiously particularly we recognize that the study has limitations. Comparison with other studies so far conducted is made. |
| Generalisability         | 21 | Discuss the generalisability (external validity) of the study results<br>As the study used the data covering whole nation, generalizability is not an issue.                                                                                                                                                                      |
| <b>Other information</b> |    |                                                                                                                                                                                                                                                                                                                                   |
| Funding                  | 22 | Give the source of funding and the role of the funders for the present study and, if applicable, for the original study on which the present article is based<br>The source of funding and the role of the funders is clearly given in the section of “Funding” given after REFERENCES.                                           |

\*Give information separately for exposed and unexposed groups.

**Note:** An Explanation and Elaboration article discusses each checklist item and gives methodological background and published examples of transparent reporting. The STROBE checklist is best used in conjunction with this article (freely available on the Web sites of PLoS Medicine at <http://www.plosmedicine.org/>, Annals of Internal Medicine at <http://www.annals.org/>, and Epidemiology at <http://www.epidem.com/>). Information on the STROBE Initiative is available at [www.strobe-statement.org](http://www.strobe-statement.org).

# BMJ Open

## Epidemiology of psoriasis and palmoplantar pustulosis: a nationwide study using the Japanese national claims database

|                                    |                                                                                                                                                                                                                                                                                                                                                                                                                                                                                                                                                                                                           |
|------------------------------------|-----------------------------------------------------------------------------------------------------------------------------------------------------------------------------------------------------------------------------------------------------------------------------------------------------------------------------------------------------------------------------------------------------------------------------------------------------------------------------------------------------------------------------------------------------------------------------------------------------------|
| Journal:                           | <i>BMJ Open</i>                                                                                                                                                                                                                                                                                                                                                                                                                                                                                                                                                                                           |
| Manuscript ID:                     | bmjopen-2014-006450.R1                                                                                                                                                                                                                                                                                                                                                                                                                                                                                                                                                                                    |
| Article Type:                      | Research                                                                                                                                                                                                                                                                                                                                                                                                                                                                                                                                                                                                  |
| Date Submitted by the Author:      | 31-Dec-2014                                                                                                                                                                                                                                                                                                                                                                                                                                                                                                                                                                                               |
| Complete List of Authors:          | Kubota, Kiyoshi; NPO Drug Safety Research Unit Japan, N/A<br>Kamijima, Yukari; NPO Drug Safety Research Unit Japan,<br>Sato, Tsugumichi; Tokyo University of Science, Faculty of Pharmaceutical<br>Sciences<br>Ooba, Nobuhiro; The Nihon University School of Pharmacy, Department of<br>Clinical Pharmacy<br>Koide, Daisuke; Graduate School of Medicine, University of Tokyo,<br>Department of Clinical Epidemiology and Systems<br>Iizuka, Hajime; Asahikawa Medical University, Department of Dermatology<br>Nakagawa, Hidemi; The Jikei University, School of Medicine, Department of<br>Dermatology |
| <b>Primary Subject<br>Heading</b>: | Epidemiology                                                                                                                                                                                                                                                                                                                                                                                                                                                                                                                                                                                              |
| Secondary Subject Heading:         | Dermatology                                                                                                                                                                                                                                                                                                                                                                                                                                                                                                                                                                                               |
| Keywords:                          | Psoriasis < DERMATOLOGY, palmoplantar pustulosis, database,<br>Epidemiology < TROPICAL MEDICINE, Japan                                                                                                                                                                                                                                                                                                                                                                                                                                                                                                    |
|                                    |                                                                                                                                                                                                                                                                                                                                                                                                                                                                                                                                                                                                           |

SCHOLARONE™  
Manuscripts



1  
2  
3  
4  
5  
6 Epidemiology of psoriasis and palmoplantar pustulosis: a nationwide study using the  
7 Japanese national claims database  
8  
9

10  
11 Kiyoshi Kubota<sup>1,2</sup>, Yukari Kamijima<sup>1,2</sup>, Tsugumichi Sato<sup>1,3</sup>, Nobuhiro Ooba<sup>1,4</sup>, Daisuke  
12 Koide<sup>5</sup>, Hajime Iizuka<sup>6</sup> and Hidemi Nakagawa<sup>7</sup>  
13  
14

15  
16  
17 1 Department of Pharmacoepidemiology, Graduate School of Medicine, University of  
18 Tokyo, Japan.  
19

20 2 NPO Drug Safety Research Unit Japan, Tokyo, Japan

21 3 Faculty of Pharmaceutical Sciences, Tokyo University of Science, Chiba, Japan

22 4 Department of Clinical Pharmacy, The Nihon University School of Pharmacy, Chiba,  
23 Japan.  
24  
25

26  
27 5 Department of Clinical Epidemiology and Systems, Graduate School of Medicine,  
28 University of Tokyo, Tokyo, Japan.  
29

30 6 Department of Dermatology, Asahikawa Medical University, Hokkaido, Japan

31 7 Department of Dermatology, The Jikei University, School of Medicine, Tokyo, Japan.  
32  
33  
34  
35

36 All correspondence should be addressed to:

37 Kiyoshi Kubota, MD PhD

38 NPO Drug Safety Research Unit Japan, Tokyo, Japan

39 1-2-13-4F Yushima, Bunkyo-ku, Tokyo 113-0034, Japan

40 Telephone: +81-3-5297-5860

41 Fax: +81-3-5297-5890

42 e-mail: [kubotape-tky@umin.net](mailto:kubotape-tky@umin.net)  
43  
44  
45  
46  
47  
48  
49

50 Key words : psoriasis; palmoplantar pustulosis; database; epidemiology; Japan  
51  
52

53 Word Count: 3704  
54  
55  
56  
57  
58  
59  
60

## ABSTRACT

**Objective:** The primary objective is to estimate the national prevalence of psoriasis and palmoplantar pustulosis (PPP) in Japan. Secondary objectives are to know (1) whether the disease activity of psoriasis and PPP varies seasonally, and (2) whether the disease severity is associated with concurrent diabetes mellitus, hyperlipidemia and hypertension.

**Settings:** Patients with a diagnosis code of psoriasis or PPP were identified using Japanese national database between April 2010 and March 2011.

**Participants:** A total of 565,903 patients with psoriasis or PPP were identified. No patient was excluded.

**Primary and Secondary Outcome Measures:** The national prevalence was calculated using the census data. We estimated the difference of proportion of patients who used healthcare service, as a proxy of disease activity, between hot and cold seasons and that of standardized prevalence of comorbidities between severe and mild diseases. The measures were finally estimated in two broad disease categories of psoriasis and PPP separately but not in all patients as planned because two disease categories were different for major aspects.

**Results:** The national prevalence of psoriasis and PPP was 0.34% (95% CI 0.34 to 0.34%) and 0.12% (0.12 to 0.12%), respectively. The difference of the proportion of patients who used healthcare service in the hottest and coldest seasons was -0.3% (-0.5 to -0.1%) for psoriasis and 10.0% (9.8 to 10.3%) for PPP. The difference of the standardized prevalence between severe and mild psoriasis was 3.1% (2.7 to 3.4%), 3.2% (2.8 to 3.6%) and 5.1% (4.7 to 5.6%) for concurrent diabetes mellitus, hyperlipidemia and hypertension, respectively. No significant difference of the prevalence of comorbidity

1  
2  
3  
4  
5  
6 was observed for PPP.

7  
8 **Conclusions:** The national prevalence, seasonal variation of disease activity and  
9 prevalence of comorbidities in Japanese patients with psoriasis and PPP estimated in  
10 this descriptive study may be used as the basic information in the future studies.  
11  
12  
13  
14

15  
16  
17  
18  
19  
20  
21  
22  
23  
24  
25 **Strengths and limitations of this study**

- 26  
27 - This study estimated the national prevalence of psoriasis and palmoplantar pustulosis  
28 (PPP) using the national database covering more than 90% of the whole Japanese  
29 population.  
30  
31  
32  
33 - The seasonal variation of the use of the healthcare service, as a proxy of disease  
34 activity, treatments for psoriasis and PPP and the prevalence of concurrent diabetes  
35 mellitus, hyperlipidemia and hypertension are also examined.  
36  
37  
38  
39 - The main limitation of the current study is that the diagnosis codes of psoriasis and  
40 PPP are not validated.  
41  
42  
43  
44 - To address the concern for possible misclassification of psoriasis and PPP by the  
45 non-specialist, results in the subgroups divided by the specialty of the department that  
46 provided the healthcare service are shown in online supplementary tables.  
47  
48  
49  
50  
51  
52  
53  
54  
55  
56  
57  
58  
59  
60

## INTRODUCTION

Psoriasis is a chronic immune-mediated disease affecting 2-4% of population in the US and Europe ,[1-3]. However, according to the recent epidemiological studies, the prevalence of psoriasis in Asian countries is lower than that in the Western countries ,[4,5]. Palmoplantar pustulosis (PPP), first described as a variant of pustular psoriasis ,[6], has been regarded as a rare disease in the Western countries ,[7] but its prevalence in Asia is not known.

Databases including claims databases have been sometimes used to study epidemiology of diseases including psoriasis ,[1,4]. Japanese universal multi-payer health-care system covering virtually all citizens was started already in 1961 but it was only recently that the Japanese national database of health insurance claims (JNDB) was created by the Ministry of Health, Labour and Welfare. The JNDB has accumulated data of all claims in electronic format issued in April 2009 or later. Since 2011, the JNDB was made available on a trial basis for the research and other secondary purposes. In the current descriptive epidemiological study, we used the JNDB data to estimate the national prevalence and some of relevant epidemiological characteristics including seasonal variation of the use of the healthcare service ,[8] of psoriasis and PPP in Japanese population.

## MATERIALS AND METHODS

### Acquisition of claims data

All the patients with diagnosis codes of psoriasis and PPP in outpatient or inpatient claims issued in electronic format between April 2010 and March 2011 were identified. The proportion of claims in electronic format was 97.9 and 99.6 % for claims issued from hospitals, 76.0 and 91.2% for those from clinics and 99.9 and 99.9% for those from community pharmacies in April 2010 and in March 2011, respectively. For claims from clinics, 89.5% were in electronic format already in August 2010 ,[9]. We selected all of the standardized domestic diagnosis codes mapped to L400 to L409 of the 10th revision of the International Statistical Classification of Diseases (ICD-10) in the master table of diagnosis codes for claims in electronic format maintained by the Medical Information System Development Center, Tokyo, Japan. In the provided data, a pair of two kinds of identifiers (defined as ID1 and ID2) was given to all the claims of each patient. Those identifiers were newly created in the JNDB because the social security number or other unique identifier is not used in Japanese healthcare system. Of these two, ID1 was generated by encrypting the combination of health card number given by each insurer, date of birth and sex and ID2 was generated by encrypting the combination of name, date of birth and sex. The former (ID1) may be useful to identify the subject when the patient's family name is changed (e.g., from the maiden to married name) while the latter (ID2) may be useful to identify the patient when the subject becomes insured by a different insurer (e.g., due to job change). Regarding the demographic data, sex and age group of 5-year interval (0-4, 5-9, ---, 80-84, and 85 years of age or older) were provided. We obtained diagnosis codes of concurrent diabetes mellitus, hyperlipidemia and hypertension and codes of drugs to treat those 3 comorbidities as well as drugs and

1  
2  
3  
4  
5  
6 phototherapy for the treatment of psoriasis and PPP. In Japanese health insurance  
7  
8 system, for patients who used the healthcare service, one outpatient claim and/or one  
9  
10 inpatient claim from one hospital or clinic are issued for one patient in each month.  
11  
12 Similarly, one claim from one community pharmacy is issued for one patient in each  
13  
14 month. We obtained the information of year and month of the claims issued for the  
15  
16 study subjects together with codes of diagnoses and treatments used in the study. We  
17  
18 have also collected the specialty of the department in a claim with a diagnosis code of  
19  
20 psoriasis and PPP issued from a hospital or clinic though this information is not a  
21  
22 required condition for the reimbursement and often not available.  
23  
24

25  
26 The study was approved by the ethics committee of the Graduate School and Faculty  
27  
28 of Medicine, University of Tokyo in October 2011 (No. 3586).  
29  
30

### 31 32 **Statistical Analysis**

33  
34 The prevalence of psoriasis and PPP in the nation were estimated by the counts of  
35  
36 patients with a diagnosis code of psoriasis and PPP divided by the population size in the  
37  
38 census as of October 2010. The normal approximation confidence interval (CI) of the  
39  
40 prevalence was also estimated. A total of 21 local diagnosis codes were classified into  
41  
42 the following 8 disease subclasses: (1) plaque psoriasis (“psoriasis vulgaris” (L400),  
43  
44 “psoriasis” (L409), “psoriasis vulgaris of entire body” (L400), “psoriasis of extremities”  
45  
46 (L400), “psoriasis vulgaris of extremities” (L400), “psoriasis vulgaris of lower back”  
47  
48 (L400) and “plaque psoriasis” (L400)), (2) scalp psoriasis (“seborrheic psoriasis” (L400)  
49  
50 and “psoriasis vulgaris of scalp” (L400)), (3) guttate psoriasis (L404), (4) psoriatic  
51  
52 arthritis (“psoriatic arthritis” (L405), “psoriatic arthritis mutilans” (L405) and “psoriatic  
53  
54 spondylitis” (L405)), (5) pustular psoriasis (“pustular psoriasis” (L401), “impetigo  
55  
56  
57  
58  
59  
60

(6)

1  
2  
3  
4  
5  
6 herpetiformis” (L401), “acrodermatitis continua” (L402), “generalized pustular psoriasis”  
7  
8 (L401) and “acute generalized pustular psoriasis” (L401), (6) erythrodermic psoriasis  
9  
10 (L408), (7) PPP (L403) and (8) pustulotic arthro-osteitis (PAO) (L403). Patients were  
11  
12 further broadly classified into “patients with PPP” when they had a diagnosis code of  
13  
14 PPP or PAO but no other diagnosis code. Otherwise, patients were classified into  
15  
16 “patients with psoriasis”. These two broad disease categories were used on an ad hoc  
17  
18 basis because the number of patients with PPP was much larger than expected and  
19  
20 patients under two disease categories were found to be different for several important  
21  
22 aspects. When the average age was calculated, we used the midpoint of the 5-year  
23  
24 interval (e.g., 37 years old for age group 35-39).  
25  
26

27  
28 To estimate the seasonal variation of the use of the healthcare service for psoriasis  
29  
30 and PPP, as a proxy for disease activity, we counted the number of patients in each  
31  
32 month during the 12-month observation period for whom an outpatient or inpatient  
33  
34 claim with a diagnosis code of psoriasis or PPP was issued. Patients were then divided  
35  
36 into 4 groups according to the combination of two dummy variables, X and Y, where the  
37  
38 values were assigned as follows: X=1 if the patient used the healthcare service for  
39  
40 psoriasis or PPP in the hottest season (July or August of 2010) while X=0 otherwise, and,  
41  
42 Y=1 if the patient used the service in the coldest season (January or February of 2011)  
43  
44 while Y=0 otherwise. We estimated the difference (and its 95% confidence interval)  
45  
46 between the mean of X (the proportion of patients who used the service in the hottest  
47  
48 season) and the mean of Y (the proportion of patients who used the service in the coldest  
49  
50 season) and the difference was tested by the paired t-test.  
51  
52

53  
54 Treatments for psoriasis and PPP were classified as systemic therapy (adalimumab,  
55  
56 infliximab, ustekinumab, methotrexate, ciclosporin and etretinate), phototherapy and  
57  
58

59  
60 (7)

1  
2  
3  
4  
5  
6  
7  
8  
9  
10  
11  
12  
13  
14  
15  
16  
17  
18  
19  
20  
21  
22  
23  
24  
25  
26  
27  
28  
29  
30  
31  
32  
33  
34  
35  
36  
37  
38  
39  
40  
41  
42  
43  
44  
45  
46  
47  
48  
49  
50  
51  
52  
53  
54  
55  
56  
57  
58  
59  
60

topical therapy (topical vitamin D and topical corticosteroid). To know the distribution of treatments for psoriasis and PPP, one patient was counted once for each treatment and the proportion of males and the average age were calculated for each treatment group. In addition, for each therapy, the proportion of patients with psoriatic arthropathy in the broad category of psoriasis and that with PAO in the broad category of PPP was calculated to know which treatment was preferred for patients with arthropathy.

To examine whether the concurrent diabetes mellitus, hyperlipidemia and hypertension are more frequent in the patients with severe psoriasis and PPP, the treatment for psoriasis and PPP was used as a surrogate of the severity of psoriasis and PPP. Patients were subdivided into the following severity classes I to IV: patients with one or more of systemic therapies (Class I), patients with phototherapy but no systemic therapy (Class II), patients with topical therapy only (Class III) and patients with no treatment for psoriasis or PPP (Class IV). Patients were defined to have diabetes mellitus when they had a diagnosis code of diabetes mellitus at least in one claim as well as codes of anti-diabetic drugs in claims issued in two or more different months during the 12-month observation period. Similarly, patients were defined to have hyperlipidemia and hypertension, respectively, when they had a diagnosis code of the disease at least in one claim as well as codes of drugs to treat the disease (i.e., lipid-lowering drugs and anti-hypertensive drugs, respectively) in claims issued in two or more months. The prevalence of diabetes mellitus, hyperlipidemia and hypertension in each severity class of psoriasis and PPP was standardized to the distribution of age and sex in the entire study population. The difference of the standardized prevalence and its 95% CI were estimated using the severity class III as a



1  
2  
3  
4  
5  
6 reference. The standard textbook [10] was used to calculate the difference of the  
7  
8 standardized prevalence and its 95% CI (equation [15-4] and “parallel formula” to  
9  
10 equation [15-10], respectively in reference 10).

11  
12 To assess who provided the healthcare service, we obtained the specialty of the  
13  
14 department specified in a claim with a diagnosis code of psoriasis and PPP. Patients  
15  
16 were subdivided into the following 3 department subgroups: (A) “patients of  
17  
18 dermatology or rheumatology” when the department was specified as either of  
19  
20 dermatology and rheumatology at least in one claim with a diagnosis code of psoriasis or  
21  
22 PPP, (B) “patients of other specialty” when the department was specified as other  
23  
24 specialty at least in one claim but not as dermatology or rheumatology in any claim and  
25  
26 (C) “patients of the department not specified” when the department was not specified in  
27  
28 any claim. Demographic and other characteristics of patients with psoriasis and PPP  
29  
30 examined in each of 3 department subgroups were shown in online supplementary  
31  
32 tables.  
33  
34

35  
36 All the statistical analyses were conducted by SAS (Version. 9.3, SAS Institute Inc.  
37  
38 Cry, NC).  
39  
40  
41  
42  
43  
44  
45  
46  
47  
48  
49  
50  
51  
52  
53  
54  
55  
56  
57  
58  
59  
60

## RESULTS

### Prevalence and demographic characteristics of psoriasis and PPP

We identified 565,903 patients with psoriasis or PPP from a total of 681,827 ID1s and 778,767 ID2s assuming that all the pairs of ID1 and ID2 represented the same patient when ID1 or ID2 of the pairs was identical. Using the size of the total population (128 million) in the census data as of October 2010, a total number of 565,903 accounted for 0.44% (95% CI 0.44 to 0.44%) of the prevalence in the nation. The 565,903 patients were broadly classified into 429,679 patients with psoriasis (the national prevalence=0.34%, 95% CI 0.34 to 0.34%) and 136,224 patients with PPP. Because 12,663 patients classified under the broad category of psoriasis had a diagnosis code of PPP or PAO as well, 148,887 patients (the national prevalence=0.12%, 95% CI 0.12 to 0.12%) had a diagnosis code of PPP or PAO. Those 12,663 patients with both diagnosis codes of psoriasis and PPP accounted for 2.9% of 429,679 with a diagnosis code of psoriasis and 8.5% of 148,887 with a code of PPP or PAO. Table 1 shows the age-sex distribution of patients with psoriasis and PPP. About 60% were male (male to female ratio=1.44) and the average age was 56.7 years old in patients with psoriasis while about two thirds were female (male to female ratio=0.53) and the average age was 55.5 years old in patients with PPP. Figure 1 shows the national prevalence of psoriasis and PPP in males and females estimated using the census data. For both males and females, the age group 75 to 79 had the highest prevalence in patients with psoriasis while the age group 55 to 59 for females and the age group 60 to 64 for males had the highest prevalence in patients with PPP. In online supplementary table S1, demographic characteristics of patients subdivided into the 3 department subgroups A (dermatology/rheumatology), B (other specialty) and C (not specified) are shown. Of a

1  
2  
3  
4  
5  
6 total of 429,679 patients with psoriasis, 132,189 (30.8%), 33,763 (7.9%) and 263,727  
7  
8 (61.4%) were classified into subgroups A, B and C, respectively. Of a total of 136,224  
9  
10 patients with PPP, 24,195 (20.0%), 12,411 (9.1%) and 96,618 (70.9%) were classified into  
11  
12 subgroups A, B and C, respectively. The male to female ratio was 1.58, 1.33 and 1.39  
13  
14 for psoriasis and 0.52, 0.50 and 0.54 for PPP and the average age was 58.1, 61.8 and  
15  
16 55.3 years old for psoriasis and 57.2, 56.9 and 54.9 years old for PPP in subgroups A, B  
17  
18 and C, respectively.  
19

### 20 21 22 23 **Domestic diagnosis codes**

24  
25 The distribution of domestic diagnosis codes divided into 8 diagnosis subgroups is  
26  
27 shown in Table 2. In patients under the broad category of psoriasis, the proportion of  
28  
29 males was lower than 50% for guttate psoriasis, pustular psoriasis, PPP and PAO but  
30  
31 higher than 70% for erythrodermic psoriasis. Patients with guttate psoriasis were  
32  
33 younger but patients with erythrodermic psoriasis were older than other types of  
34  
35 psoriasis. In patients under the broad category of PPP, patients with PAO included  
36  
37 more females and were younger than patients without PAO. When patients were  
38  
39 subdivided into 3 department subgroups, more than half of patients were in the  
40  
41 department subclass A (dermatology/rheumatology) for “pustular psoriasis”  
42  
43 (2,953/4,636), “erythrodermic psoriasis” (1,045/1,610) and “psoriatic arthritis”  
44  
45 (4,530/8,360) (online supplementary table S2).  
46  
47  
48  
49  
50

### 51 **Seasonal variation of the use of healthcare service**

52  
53 Figure 2 shows the seasonal variation of the use of the healthcare service in patients  
54  
55 with psoriasis and PPP. On average, about 39% of patients with psoriasis and 36% of  
56  
57  
58  
59  
60

1  
2  
3  
4  
5  
6 patients with PPP used the healthcare service in each month. In patients with  
7  
8 psoriasis, the proportion of patients who used the healthcare service in the hottest  
9  
10 season (July or August of 2010) (52.6%) was similar to that in the coldest season  
11  
12 (January or February of 2011) (53.0%) and the difference was -0.3% (95% CI -0.5 to  
13  
14 -0.1%, P=0.0004). On the other hand, in patients with PPP, the proportion of patients  
15  
16 who used the service in the hottest season (55.3%) was higher than that in the coldest  
17  
18 season (45.3%) and the difference was 10.0% (9.8 to 10.3%, P<0.0001). As shown in  
19  
20 online supplementary tables S3 and S4, the predominance of the use of the healthcare  
21  
22 service in the hottest season in patients with PPP but not in patients with psoriasis was  
23  
24 also observed in all of the 3 department subgroups.  
25  
26  
27  
28  
29

### 30 **Treatments for psoriasis and PPP**

31  
32 In table 3, treatments for psoriasis and PPP are summarized. Systemic therapies  
33  
34 were used mainly for patients with psoriasis but a few patients with PPP also used  
35  
36 etretinate and other systemic therapies. In patients treated by biologics, patients were  
37  
38 relatively young and the proportion of patients with arthropathy was high. Of 3,291  
39  
40 patients with psoriasis on a biologic treatment, 2,674 (81.1%) were in the department  
41  
42 subgroup A (dermatology/rheumatology) (online supplementary table S5).  
43  
44 Phototherapy was more frequently used for patients with PPP than patients with  
45  
46 psoriasis while topical vitamin D was selected more frequently for patients with  
47  
48 psoriasis than patients with PPP. About 80% of patients with both psoriasis and PPP  
49  
50 used topical corticosteroid. No treatment for psoriasis or PPP was given to about 9% of  
51  
52 patients with psoriasis and about 16% of patients with PPP. Both for psoriasis and  
53  
54  
55  
56 PPP, patients with no treatment included more patients with arthropathy when  
57  
58  
59  
60

1  
2  
3  
4  
5  
6 compared with those with topical therapy particularly in the department subgroup B  
7  
8 (other specialty) (online supplementary table S5).  
9

### 10 11 12 **Comorbidities of psoriasis and PPP** 13

14 Table 4 shows the number of patients and standardized prevalence of concurrent  
15 diabetes mellitus, hyperlipidemia and hypertension in the severity classes I to III in  
16 patients with psoriasis and PPP. For patients with psoriasis, the standardized  
17 prevalence was higher in Class I (systemic therapy) than in Class III (topical therapy  
18 only) in the entire population as well as in 3 department subgroups (online  
19 supplementary table S6). The prevalence was similar between Class II (phototherapy)  
20 and Class III except for the department subgroup A (dermatology/rheumatology) where  
21 the prevalence was higher in Class II than in Class III. The prevalence of the  
22 comorbidities was lower in Class IV (no treatment) than Class III in the department  
23 subgroup A (dermatology/rheumatology) but higher in Class IV than in Class III in  
24 other department subgroups (online supplementary table S6). For patients with PPP,  
25 no remarkable difference was observed between Classes I, II and III.  
26  
27  
28  
29  
30  
31  
32  
33  
34  
35  
36  
37  
38  
39  
40  
41  
42  
43  
44  
45  
46  
47  
48  
49  
50  
51  
52  
53  
54  
55  
56  
57  
58  
59  
60

## DISCUSSION

We identified about 0.34% of patients with a diagnosis code of psoriasis and 0.12 % with a code of PPP in the JNDB during the 12-month period between April 2010 and March 2011. About 60% of patients with psoriasis were males while about two thirds of patients with PPP were females. The use of the healthcare service was roughly constant during the 12-month observation period in patients with psoriasis while the use of the service prevailed in summer in patients with PPP. The prevalence of the concurrent diabetes mellitus, hyperlipidemia and hypertension in patients with psoriasis receiving a systemic therapy was higher than that in those receiving a topical therapy only.

The prevalence of psoriasis in our study, 0.34%, was lower than 2 to 4 % in the Western countries and the male predominance in our study was different from the almost equal distribution of males and females in the Western countries ,[1-3]. The low prevalence and male predominance of patients with psoriasis were also found in other Asian countries: e.g., the prevalence of males and females was 0.23% and 0.16 % in Taiwan ,[4] and 0.54% and 0.44% in China ,[5], respectively. On the other hand, the prevalence of PPP in our study, 0.12% was higher than 0.01 to 0.05% in the Western countries though the female predominance in the current study was also observed in the Western countries ,[7,11,12]. Around 20% of patients with PPP were reported to have psoriasis ,[7,13] and in our study, 8.5% of patients with diagnosis code of PPP or PAO had psoriasis. We observed that the male to female ratio was different between psoriasis and PPP and that psoriasis was more prevalent in the older age group than PPP. The seasonal variation of the use of the healthcare service in patients with PPP, as a proxy of the disease activity, was not observed in patients with psoriasis.

1  
2  
3  
4  
5  
6 According to the proposal in the International Psoriasis Council in 2007, PPP should be  
7  
8 considered a separate condition from psoriasis ,[12,14]. The findings in the current  
9  
10 descriptive epidemiological study indicated some relationship between psoriasis and  
11  
12 PPP (e.g., the proportion of patients with psoriasis in those with PPP was 8.5% and  
13  
14 higher than 0.34%, the prevalence of psoriasis in the whole population) but the  
15  
16 difference for several aspects between psoriasis and PPP as well in accordance with the  
17  
18 above-mentioned proposal.  
19

20  
21 About 9% of patients with psoriasis and 16% of patients with PPP had no therapy for  
22  
23 psoriasis and PPP in our study. In the previous study in the UK, one third of patients  
24  
25 with psoriasis were not using any therapy at the time of evaluation ,[1]. According to a  
26  
27 survey conducted in the US between 2003 and 2011, 49, 24 and 9% of patients with mild,  
28  
29 moderate and severe psoriasis were untreated and about half of patients were  
30  
31 dissatisfied with their treatment ,[15]. Likewise, about 9% of patients with psoriasis  
32  
33 and about 16% of patients with PPP receiving no therapy for psoriasis and PPP in our  
34  
35 study may include those who are dissatisfied with the treatment. However, some of  
36  
37 them might receive no therapy for psoriasis and PPP simply because they had very mild  
38  
39 disease. Interestingly, as shown in online supplementary table S5, patients with no  
40  
41 treatment for psoriasis and PPP included more patients with arthropathy than those  
42  
43 with topical therapy particularly in the department subgroup B (other specialty).  
44  
45 Thus, the severity class IV (no treatment) in the department subgroup B might  
46  
47 represent more severe psoriasis or PPP than the severity class III (topical therapy only)  
48  
49 while in other department subgroups, the severity class IV might represent not so  
50  
51 severe psoriasis or PPP when compared to the severity class III.  
52  
53  
54

55  
56 Many studies conducted in the Western and Asian countries reported that the  
57  
58  
59  
60

1  
2  
3  
4  
5  
6 prevalence and incidence of the risk factors for myocardial infarction and stroke such as  
7  
8 diabetes mellitus, hyperlipidemia and hypertension were high in patients with psoriasis,  
9  
10 particularly in those with severe psoriasis ,[16-19]. The reasons why the ~~increased~~  
11  
12 risk of those conditions is increased in psoriasis have not been fully determined but the  
13  
14 increased risk may be due to the high prevalence of obesity and other known  
15  
16 predisposing factors ,[20]. It is also possible that some of the comorbidities are adverse  
17  
18 reactions to ciclosporin and other systematic therapies for psoriasis ,[21]. In our study,  
19  
20 the increase of the comorbidity was observed in patients with severe psoriasis but not in  
21  
22 patients with severe PPP when compared with patients with topical therapy only. One  
23  
24 possible interpretation for this observation is that ciclosporin is the major contributor to  
25  
26 the high prevalence of the comorbidity because ciclosporin was used by more than half  
27  
28 of patients with psoriasis receiving a systemic therapy while ciclosporin was used only  
29  
30 by 10% of those with PPP receiving a systematic therapy.  
31  
32

33  
34 The main limitation of the current study is that the diagnosis codes of psoriasis and  
35  
36 PPP are not validated. Therefore, the true national prevalence may be higher or lower  
37  
38 than that reported in the current study. One concern is misclassification of diseases  
39  
40 particularly when the diagnosis is made by a non-specialist. However, demographic  
41  
42 characteristics and other major findings were common to the whole population and  
43  
44 department subgroup A (dermatology/rheumatology). This finding would suggest that  
45  
46 the whole patients identified by diagnosis codes of the claims in the current study  
47  
48 roughly represented patients with psoriasis and PPP who used healthcare service  
49  
50 during the observation period in the nation. Nevertheless, we could not exclude some  
51  
52 types of misclassification. For instance, the proportion of guttate psoriasis in patients  
53  
54 with psoriasis was around 4% in a previous study in Japan ,[22] and higher than 0.6%  
55  
56  
57  
58  
59  
60



1  
2  
3  
4  
5  
6 in the current study (table 2), which could be due to misclassification. The strength of  
7  
8 the study is the use of the claims database covering most (more than 90%) patients in  
9  
10 the nation.

11  
12 In conclusion, the study using the JNDB collected from the whole nation revealed  
13  
14 that the prevalence of psoriasis was lower and the prevalence of PPP was higher than  
15  
16 that in the Western countries. As in the previous studies, the severe psoriasis was  
17  
18 associated with the high prevalence of the concurrent diabetes mellitus, hyperlipidemia  
19  
20 and hypertension. The national prevalence and other characteristics of psoriasis and  
21  
22 PPP estimated in the current descriptive study may provide the basic information for  
23  
24 the future studies.  
25  
26  
27  
28  
29  
30  
31

32 **Acknowledgement** We thank Japanese Society for Psoriasis Research which motivated  
33  
34 and encouraged us to conduct the current study.

35  
36 **Contributors** KK conceived and designed the study, analyzed and interpreted the data  
37  
38 and drafted the manuscript. YK analyzed and interpreted the data. TS, NO and DK  
39  
40 contributed to procedures to acquire the data and interpreted the data. HI and HN  
41  
42 contributed to conception and design of the study. In addition, all authors carefully  
43  
44 reviewed the draft and revised it critically. All authors gave the final approval of the  
45  
46 manuscript.  
47  
48

49 **Funding** The current study was supported by the research fund provided by Janssen  
50  
51 Pharmaceutical K.K. which was not involved in any steps of design or conduct of the  
52  
53 research and analysis, interpretation and publication of the results.  
54  
55

56 **Competing interests** None.  
57  
58  
59  
60

1  
2  
3  
4  
5  
6 **Provenance and peer review** Not commissioned; externally peer reviewed.  
7

8 **Data sharing statement** No additional data are available.  
9  
10  
11  
12  
13  
14  
15  
16  
17  
18  
19  
20  
21  
22  
23  
24  
25  
26  
27  
28  
29  
30  
31  
32  
33  
34  
35  
36  
37  
38  
39  
40  
41  
42  
43  
44  
45  
46  
47  
48  
49  
50  
51  
52  
53  
54  
55  
56  
57  
58  
59  
60

For peer review only

**REFERENCES**

1. Gelfand JM, Weinstein R, Porter SB, *et al.* Prevalence and treatment of psoriasis in the United Kingdom - a population-based study. *Arch Dermatol* 2005;141:1537-41.
2. Kurd SK, Gelfand JM. The prevalence of previously diagnosed and undiagnosed psoriasis in US adults - results from NHANES 2003-2004. *J Am Acad Dermatol* 2009; 60:218-24.
3. Parisi R, Symmons DP, Griffiths CE, *et al.* Identification and Management of Psoriasis and Associated Comorbidity (IMPACT) project team. Global epidemiology of psoriasis - a systematic review of incidence and prevalence. *J Invest Dermatol* 2013;133: 377-85.
4. Chang YT, Chen TJ, Liu PC, *et al.* Epidemiological study of psoriasis in the National Health Insurance Database in Taiwan. *Acta Derm Venereol* 2009;89:262-66.
5. Ding X, Wang T, Shen Y, *et al.* Prevalence of psoriasis in China - a population-based study in six cities. *Eur J Dermatol* 2012; 22:663-67.
6. Barber HW. Acrodermatitis continua vel perstans (dermatitis repens) and psoriasis pustulosa. *Br J Dermatol* 1930; 42:500-18.
7. De Waal AC, Van de Kerkhof PCM. Pustulosis palmoplantaris is a disease distinct

- 1  
2  
3  
4  
5  
6 from psoriasis. *J Dermatolog Treat* 2011;22:102-105.  
7  
8  
9 8. Hancox JG, Sheridan SC, Feldman SR, *et al.* Seasonal variation of dermatologic  
10  
11 disease in the USA: a study of office visits from 1990 to 1998. *Int J Dermatol*  
12  
13 2004;43:6-11.  
14  
15  
16  
17 9. Ministry of Health, Labour and Welfare. [Current status of electronic submission  
18  
19 of health care claims and advancement of reimbursement of health care service fee].  
20  
21 2011 Jul 21. Japanese. [http://www.mhlw.go.jp/stf/shingi/2r9852000001jcmq-att](http://www.mhlw.go.jp/stf/shingi/2r9852000001jcmq-att/2r9852000001jcu1.pdf)  
22  
23 [/2r9852000001jcu1.pdf](http://www.mhlw.go.jp/stf/shingi/2r9852000001jcu1.pdf) (accessed 9 August 2014).  
24  
25  
26  
27  
28  
29 10. Greenland S, Rothman KJ. Introduction to stratified analysis. In: Rothman KL,  
30  
31 Greenland S, Lash T, eds. *Modern Epidemiology*. 3rd ed. Philadelphia:  
32  
33 Lippincott Williams & Wilkins; 2008: 258-82.  
34  
35  
36  
37  
38 11. Asumalahti K, Ameen M, Suomela S, *et al.* Genetic analysis of PSORS1  
39  
40 distinguishes guttate psoriasis and palmoplantar pustulosis. *J Invest Dermatol*  
41  
42 2003;120: 627-32.  
43  
44  
45  
46 12. Brunasso AM, Puntoni M, Aberer W, *et al.* Clinical and epidemiological comparison  
47  
48 of patients affected by palmoplantar plaque psoriasis and palmoplantar pustulosis -  
49  
50 a case series study. *Br J Dermatol* 2013;168:1243-51.  
51  
52  
53  
54  
55 13. Gelfand JM, Neimann AL, Shin DB, *et al.* Risk of myocardial infarction in patients  
56  
57  
58  
59  
60

- 1  
2  
3  
4  
5  
6 with psoriasis. *JAMA* 2006; 296:1735-41.  
7  
8  
9 14. Griffiths CE, Christophers E, Barker JN, *et al.* A classification of psoriasis vulgaris  
10  
11 according to phenotype. *Br J Dermatol* 2007;168:1243-51.  
12  
13  
14 15. Armstrong AW, Robertson AD, Wu J, *et al.* Undertreatment, treatment trends, and  
15  
16 treatment dissatisfaction among patients with psoriasis and psoriatic arthritis in  
17  
18 the United States - findings from the national psoriasis foundation surveys,  
19  
20 2003-2011. *JAMA Dermatol* 2013;149:1180-85.  
21  
22  
23  
24  
25  
26 16. Azfar RS, Seminara NM, Shin DB, *et al.* Increased risk of diabetes mellitus and  
27  
28 likelihood of receiving diabetes mellitus treatment in patients with psoriasis.  
29  
30  
31  
32 *Arch Dermatol* 2012; 148:995-1000.  
33  
34  
35 17. Cohen AD, Weitzman D, Dreiherr J. Psoriasis and hypertension - a case-control study.  
36  
37  
38 *Acta Derm Venereol* 2010;90: 23-26.  
39  
40  
41 18. Ma C, Harskamp CT, Armstrong EJ, *et al.* The association between psoriasis and  
42  
43 dyslipidaemia - a systematic review. *Br J Dermatol* 2013;168:486-95.  
44  
45  
46  
47 19. Tsai TF, Wang TS, Hung ST, *et al.* Epidemiology and comorbidities of psoriasis  
48  
49 patients in a national database in Taiwan. *J Dermatol Sci* 2011; 63:40-46.  
50  
51  
52  
53 20. Samarasekera EJ, Neilson JM, Warren RB, *et al.* Incidence of cardiovascular  
54  
55 disease in individuals with psoriasis - a systematic review and meta-analysis. *J*  
56  
57  
58  
59  
60

1  
2  
3  
4  
5  
6 *Invest Dermatol* 2013;133, 2340–46.  
7

8  
9 21. Kremers HM, McEvoy MT, Dann FJ, *et al.* Heart disease in psoriasis. *J Am Acad*  
10

11 *Dermatol* 2007;57:347-54.  
12

13  
14 22. Takahashi H, Nakamura K, Kaneko F, *et al.* Japanese Society for Psoriasis  
15

16 Research.. Analysis of psoriasis patients registered in Japanese Society for  
17

18 Psoriasis Research from 2002 to 2008. *J Dermatol* 2011;38: 1125-29.  
19  
20  
21  
22  
23  
24  
25  
26  
27  
28  
29  
30  
31  
32  
33  
34  
35  
36  
37  
38  
39  
40  
41  
42  
43  
44  
45  
46  
47  
48  
49  
50  
51  
52  
53  
54  
55  
56  
57  
58  
59  
60

**Table 1**

Age-sex distribution of patients with psoriasis and PPP in Japanese National Database

| Age   | Psoriasis* |         |         | PPP    |        |         |
|-------|------------|---------|---------|--------|--------|---------|
|       | Male       | Female  | Total   | Male   | Female | Total   |
| 0-9   | 3,376      | 3,177   | 6,553   | 396    | 382    | 778     |
| 10-19 | 4,430      | 5,046   | 9,476   | 689    | 923    | 1,612   |
| 20-29 | 9,800      | 9,904   | 19,704  | 1,821  | 3,673  | 5,494   |
| 30-39 | 27,915     | 22,251  | 50,166  | 5,049  | 9,388  | 14,437  |
| 40-49 | 34,637     | 21,588  | 56,225  | 7,256  | 13,237 | 20,493  |
| 50-59 | 44,963     | 28,146  | 73,109  | 10,318 | 23,157 | 33,475  |
| 60-69 | 59,510     | 33,907  | 93,417  | 12,384 | 23,021 | 35,405  |
| 70-79 | 48,072     | 30,930  | 79,002  | 7,070  | 11,559 | 18,629  |
| 80-   | 21,070     | 20,957  | 42,027  | 2,265  | 3,636  | 5,901   |
| Total | 253,773    | 175,906 | 429,679 | 47,248 | 88,976 | 136,224 |

\* Patients with both of diagnosis codes of psoriasis and PPP are classified as those with psoriasis  
 PPP, palmoplantar pustulosis.

**Table 2**

Diagnoses given in claims for patients with psoriasis and PPP in Japanese National Database

| Diagnoses               | N*      | (%)    | Male    | (%)    | Age (SD)     |
|-------------------------|---------|--------|---------|--------|--------------|
| <b>Psoriasis</b>        |         |        |         |        |              |
| Plaque psoriasis        | 418,705 | (97.4) | 248,770 | (59.4) | 56.7 (18.7)  |
| Scalp psoriasis         | 2,832   | (0.7)  | 1,682   | (59.4) | 57.2 (18.1)  |
| Guttate psoriasis       | 2,572   | (0.6)  | 1,136   | (44.2) | 42.4 (20.6)  |
| Psoriatic arthritis     | 8,360   | (1.9)  | 4,431   | (53.0) | 55.5 (15.1)  |
| Pustular psoriasis      | 4,636   | (1.1)  | 2,250   | (48.5) | 55.9 (19.3)  |
| Erythrodermic psoriasis | 1,610   | (0.4)  | 1,176   | (73.0) | 60.4 (17.2)] |
| PPP †                   | 12,625  | (2.9)  | 4,675   | (37.0) | 58.3 (13.7)  |
| PAO †                   | 401     | (0.1)  | 85      | (21.2) | 53.1 (12.1)  |
| Total                   | 429,679 | (100)  | 253,773 | (59.1) | 56.7 (18.7)  |
| <b>PPP</b>              |         |        |         |        |              |
| PPP                     | 135,647 | (99.6) | 47,063  | (34.7) | 55.5 (15.5)  |
| PAO                     | 5,734   | (4.2)  | 1,307   | (22.8) | 52.1 (12.6)  |
| Total                   | 136,224 | (100)  | 47,248  | (34.7) | 55.5 (15.5)  |

\* One patient is counted once for each diagnosis and sum of patients with 8 diagnoses for psoriasis and that of 2 diagnoses for PPP exceed a total.

† Patients with diagnosis codes of psoriasis and PPP or PAO.

PPP, palmoplantar pustulosis; PAO, pustulotic arthro-osteitis.



**Table 3**

Treatments for psoriasis and PPP in Japanese National Database

| PAO                     | Psoriasis<br>N=429,679 |                   |                |                               | PPP<br>N=136,224  |                  |                |                |
|-------------------------|------------------------|-------------------|----------------|-------------------------------|-------------------|------------------|----------------|----------------|
|                         | Male                   |                   | Age<br>(SD)    | Psoriatic<br>arthritis<br>(%) | Male              |                  |                | N<br>(%)       |
|                         | N*<br>(%)              | N<br>(%)          |                |                               | N*<br>(%)         | N<br>(%)         | Age<br>(SD)    |                |
| <b>Systemic therapy</b> |                        |                   |                |                               |                   |                  |                |                |
| Adalimumab              | 1,322<br>(0.3)         | 892<br>(67.5)     | 50.0<br>(14.0) | 453<br>(34.3)                 | 64<br>(0.05)      | 12<br>(18.8)     | 59.1<br>(12.1) | 7<br>(10.9)    |
| Infliximab              | 2,141<br>(0.5)         | 1,344<br>(62.8)   | 48.1<br>(13.9) | 741<br>(34.6)                 | 197<br>(0.1)      | 55<br>(27.9)     | 51.5<br>(13.5) | 13<br>(6.6)    |
| Ustekinumab             | -- †                   |                   |                |                               | -- †              |                  |                |                |
| Methotrexate            | 1,680<br>(0.4)         | 1,072<br>(63.8)   | 52.0<br>(15.5) | 480<br>(28.6)                 | 174<br>(0.1)      | 53<br>(30.5)     | 54.6<br>(13.4) | 19<br>(10.9)   |
| Ciclosporin             | 21,997<br>(5.1)        | 13,813<br>(62.8)  | 53.2<br>(16.2) | 1,604<br>(7.3)                | 251<br>(0.2)      | 98<br>(39.0)     | 52.9<br>(13.8) | 20<br>(8.0)    |
| Etretinate              | 15,481<br>(3.6)        | 11,025<br>(71.2)  | 60.1<br>(13.6) | 609<br>(3.9)                  | 1,950<br>(1.4)    | 725<br>(37.2)    | 57.5<br>(11.7) | 35<br>(1.8)    |
| Phototherapy            | 21,005<br>(4.9)        | 12,370<br>(58.9)  | 54.6<br>(18.1) | 309<br>(1.5)                  | 10,408<br>(7.6)   | 3,657<br>(35.1)  | 53.3<br>(15.0) | 156<br>(1.5)   |
| <b>Topical therapy</b>  |                        |                   |                |                               |                   |                  |                |                |
| Topical                 |                        |                   |                |                               |                   |                  |                |                |
| vitamin D<br>(59.6)     | 256,122<br>(60.9)      | 156,050<br>(18.5) | 53.4<br>(1.4)  | 3,698<br>(31.5)               | 42,903<br>(33.3)  | 14,276<br>(14.9) | 53.0<br>(1.4)  | 612            |
| Topical                 |                        |                   |                |                               |                   |                  |                |                |
| corticosteroid          | 349,568<br>(81.4)      | 211,744<br>(60.6) | 54.9<br>(18.1) | 5,323<br>(1.5)                | 109,692<br>(80.5) | 37,881<br>(34.5) | 53.4<br>(15.3) | 3,576<br>(3.3) |
| No treatment            | 38,224<br>(8.9)        | 19,398<br>(50.7)  | 58.6<br>(19.5) | 1,851<br>(4.8)                | 21,209<br>(15.6)  | 7,527<br>(35.5)  | 54.6<br>(16.2) | 2,083<br>(9.8) |

1  
2  
3  
4  
5  
6 Table 3 --- continued

7 \* One patient is counted once for each treatment.

8 † Less than 10 patients had ustekinumab which was approved in the last month of the  
9 observation period.

10 PPP, palmoplantar pustulosis; PAO, pustulotic arthro-osteitis.  
11  
12  
13  
14  
15  
16  
17  
18  
19  
20  
21  
22  
23  
24  
25  
26  
27  
28  
29  
30  
31  
32  
33  
34  
35  
36  
37  
38  
39  
40  
41  
42  
43  
44  
45  
46  
47  
48  
49  
50  
51  
52  
53  
54  
55  
56  
57  
58  
59  
60

For peer review only

**Table 4**

Prevalence of diabetes mellitus, hyperlipidemia and hypertension in 3 severity classes of patients with psoriasis and PPP in Japanese National Database

|                          | Psoriasis                       |                                 |                                   | PPP                             |                                 |                                   |
|--------------------------|---------------------------------|---------------------------------|-----------------------------------|---------------------------------|---------------------------------|-----------------------------------|
|                          | Class I<br>Systemic<br>therapy* | Class II<br>Photo-<br>therapy † | Class III<br>Topical<br>therapy ‡ | Class I<br>Systemic<br>therapy* | Class II<br>Photo-<br>therapy † | Class III<br>Topical<br>therapy ‡ |
|                          | N=                              | N=                              | N=                                | N=                              | N=                              | N=                                |
|                          | 39,796                          | 18,833                          | 332,826                           | 2,588                           | 10,153                          | 102,274                           |
| <b>Diabetes mellitus</b> |                                 |                                 |                                   |                                 |                                 |                                   |
| N §                      | 5,271                           | 1,747                           | 32,378                            | 260                             | 686                             | 7,585                             |
| Prevalence ¶ (%)         | 12.7                            | 9.0                             | 9.6                               | 9.3                             | 7.7                             | 8.5                               |
| Difference ** (%)        | 3.1                             | -0.6                            | ref                               | 0.8                             | -0.8                            | ref                               |
| (95%CI)                  | (2.7,3.4)                       | (-1.0,-0.2)                     |                                   | (-0.5,2.1)                      | (-1.4,-0.2)                     |                                   |
| <b>Hyperlipidemia</b>    |                                 |                                 |                                   |                                 |                                 |                                   |
| N §                      | 8,208                           | 3,125                           | 56,561                            | 557                             | 1,731                           | 17,783                            |
| Prevalence ¶ (%)         | 20.7                            | 16.7                            | 17.5                              | 18.3                            | 17.4                            | 17.3                              |
| Difference ** (%)        | 3.2                             | -0.8                            | ref                               | 1.0                             | 0.1                             | ref                               |
| (95%CI)                  | (2.8,3.6)                       | (-1.3,-0.3)                     |                                   | (-0.6,2.6)                      | (-0.7,1.0)                      |                                   |
| <b>Hypertension</b>      |                                 |                                 |                                   |                                 |                                 |                                   |
| N §                      | 11,795                          | 4,369                           | 78,996                            | 576                             | 1,885                           | 19,332                            |
| Prevalence ¶ (%)         | 28.5                            | 22.8                            | 23.4                              | 22.4                            | 21.8                            | 21.7                              |
| Difference ** (%)        | 5.1                             | -0.6                            | ref                               | 0.6                             | 0.04                            | ref                               |
| (95%CI)                  | (4.7,5.6)                       | (-1.2,-0.1)                     |                                   | (-1.0,2.3)                      | (-0.9,0.9)                      |                                   |

\* Patients who had one or more of systemic therapies given in Table 3.

† Patients with phototherapy but no systemic therapy.

‡ Patients with topical vitamin D or topical corticosteroid only.

§ Number of patients with a diagnosis code of the concurrent disease (diabetes mellitus, hyperlipidemia or hypertension) at least in one claim as well as drugs to treat the concurrent disease in the claims issued in 2 or more different months.

¶ Prevalence standardized to the distribution of age and sex in the entire study population of 565,903 subjects.

\*\* Difference in prevalence compared with Class III.

1  
2  
3  
4  
5 Table 4 --- continued  
6  
7

8 PPP, palmoplantar pustulosis; CI, confidence interval.  
9  
10  
11  
12  
13  
14  
15  
16  
17  
18  
19  
20  
21  
22  
23  
24  
25  
26  
27  
28  
29  
30  
31  
32  
33  
34  
35  
36  
37  
38  
39  
40  
41  
42  
43  
44  
45  
46  
47  
48  
49  
50  
51  
52  
53  
54  
55  
56  
57  
58  
59  
60

For peer review only

**Legends of figures**

**Figure 1.** The national prevalence of psoriasis and palmoplantar pustulosis (PPP) in Japanese population. The prevalence was estimated as the counts of patients with psoriasis or PPP in the Japanese national claims database between April 2010 and March 2011 divided by the population size in the census data as of October 2010.

**Figure 2.** The use of the healthcare service in patients with psoriasis and palmoplantar pustulosis (PPP). The proportion was estimated as the number of patients for whom a claim with a diagnosis code of psoriasis or PPP was issued in each of 12 months between April 2010 and March 2011 divided by the number of the whole patients with psoriasis and PPP, respectively.

1  
2  
3  
4  
5  
6  
7  
8  
9  
10  
11  
12  
13  
14  
15  
16  
17  
18  
19  
20  
21  
22  
23  
24  
25  
26  
27  
28  
29  
30  
31  
32  
33  
34  
35  
36  
37  
38  
39  
40  
41  
42  
43  
44  
45  
46  
47  
48  
49  
50  
51  
52  
53  
54  
55  
56  
57  
58  
59  
60

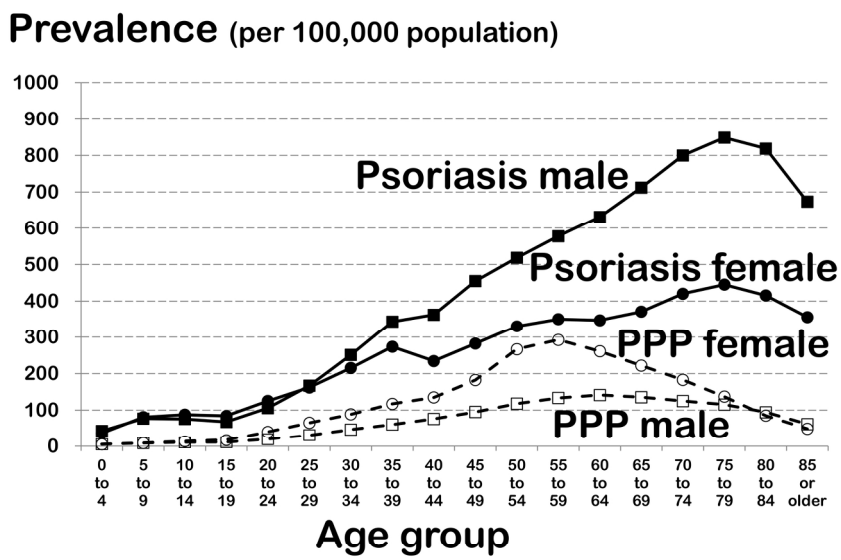

190x142mm (300 x 300 DPI)

Review only

1  
2  
3  
4  
5  
6  
7  
8  
9  
10  
11  
12  
13  
14  
15  
16  
17  
18  
19  
20  
21  
22  
23  
24  
25  
26  
27  
28  
29  
30  
31  
32  
33  
34  
35  
36  
37  
38  
39  
40  
41  
42  
43  
44  
45  
46  
47  
48  
49  
50  
51  
52  
53  
54  
55  
56  
57  
58  
59  
60

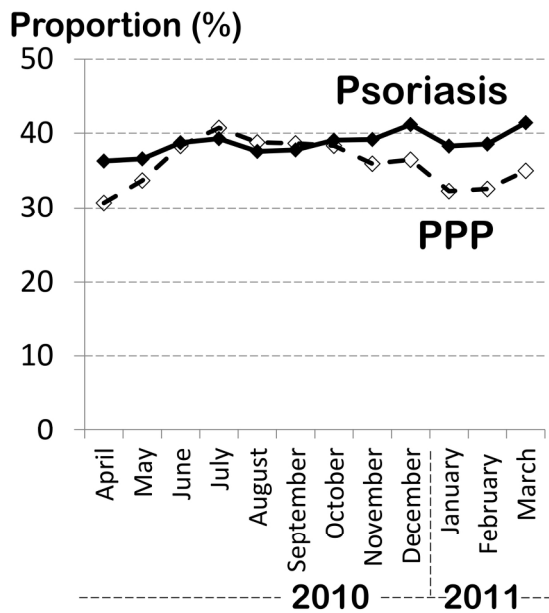

190x142mm (300 x 300 DPI)

Review only

## Supplementary Tables

## Supplementary Table S1

Age-sex distribution of patients with psoriasis and PPP subdivided by the department specified in a claim with a diagnosis code of psoriasis and PPP in Japanese National Database

| Age<br>(years old)                                                | Psoriasis <sup>a</sup> |                 | PPP           |                 |
|-------------------------------------------------------------------|------------------------|-----------------|---------------|-----------------|
|                                                                   | Male<br>N (%)          | Female<br>N (%) | Male<br>N (%) | Female<br>N (%) |
| All patients                                                      |                        |                 |               |                 |
| 0-9                                                               | 3,376 (1.3)            | 3,177 (1.8)     | 396 (0.8)     | 382 (0.4)       |
| 10-19                                                             | 4,430 (1.7)            | 5,046 (2.9)     | 689 (1.5)     | 923 (1.0)       |
| 20-29                                                             | 9,800 (3.9)            | 9,904 (5.6)     | 1,821 (3.9)   | 3,673 (4.1)     |
| 30-39                                                             | 27,915 (11.0)          | 22,251 (12.6)   | 5,049 (10.7)  | 9,388 (10.6)    |
| 40-49                                                             | 34,637 (13.6)          | 21,588 (12.3)   | 7,256 (15.4)  | 13,237 (14.9)   |
| 50-59                                                             | 44,963 (17.7)          | 28,146 (16.0)   | 10,318 (21.8) | 23,157 (26.0)   |
| 60-69                                                             | 59,510 (23.5)          | 33,907 (19.3)   | 12,384 (26.2) | 23,021 (25.9)   |
| 70-79                                                             | 48,072 (18.9)          | 30,930 (17.6)   | 7,070 (15.0)  | 11,559 (13.0)   |
| 80-                                                               | 21,070 (8.3)           | 20,957 (11.9)   | 2,265 (4.8)   | 3,636 (4.1)     |
| Total                                                             | 253,773 (100)          | 175,906 (100)   | 47,248 (100)  | 88,976 (100)    |
| Mean (SD)                                                         | 57.1 (17.8)            | 56.1 (19.9)     | 55.7 (16.1)   | 55.5 (15.2)     |
| Patients of dermatology or rheumatology (subgroup A) <sup>b</sup> |                        |                 |               |                 |
| 0-9                                                               | 810 (1.0)              | 814 (1.6)       | 36 (0.4)      | 88 (0.3)        |
| 10-19                                                             | 1,137 (1.4)            | 1,278 (2.5)     | 70 (0.8)      | 110 (0.6)       |
| 20-29                                                             | 2,659 (3.3)            | 2,561 (5.0)     | 247 (2.7)     | 578 (3.2)       |
| 30-39                                                             | 7,677 (9.5)            | 5,582 (10.9)    | 828 (8.9)     | 1,567 (8.8)     |
| 40-49                                                             | 9,831 (12.1)           | 5,978 (11.7)    | 1,247 (13.4)  | 2,464 (13.8)    |
| 50-59                                                             | 13,674 (16.9)          | 8,607 (16.8)    | 1,946 (20.9)  | 4,777 (26.7)    |
| 60-69                                                             | 20,802 (25.7)          | 11,290 (22.0)   | 2,851 (30.6)  | 5,226 (29.2)    |
| 70-79                                                             | 17,355 (21.4)          | 9,840 (19.2)    | 1,638 (17.6)  | 2,493 (13.9)    |
| 80-                                                               | 6,975 (8.6)            | 5,319 (10.4)    | 442 (4.8)     | 623 (3.5)       |
| Total                                                             | 80,920 (100)           | 51,269 (100)    | 9,305 (100)   | 17,890 (100)    |
| Mean (SD)                                                         | 58.8 (17.1)            | 57.1 (19.0)     | 58.1 (14.8)   | 56.8 (14.1)     |



Supplementary Table S1 -- continued

| Age<br>(years old)                                                                      | Psoriasis <sup>a</sup> |                 | PPP           |                 |
|-----------------------------------------------------------------------------------------|------------------------|-----------------|---------------|-----------------|
|                                                                                         | Male<br>N (%)          | Female<br>N (%) | Male<br>N (%) | Female<br>N (%) |
| Patients of department other than dermatology or rheumatology (subgroup B) <sup>c</sup> |                        |                 |               |                 |
| 0-9                                                                                     | 288 (1.5)              | 232 (1.6)       | 53 (1.3)      | 30 (0.4)        |
| 10-19                                                                                   | 210 (1.1)              | 225 (1.6)       | 56 (1.3)      | 61 (0.7)        |
| 20-29                                                                                   | 418 (2.2)              | 476 (3.3)       | 110 (2.6)     | 265 (3.2)       |
| 30-39                                                                                   | 1,304 (6.8)            | 1,098 (7.6)     | 384 (9.2)     | 818 (9.9)       |
| 40-49                                                                                   | 1,889 (9.8)            | 1,380 (9.5)     | 600 (14.4)    | 1,091 (13.2)    |
| 50-59                                                                                   | 3,058 (15.9)           | 2,091 (14.4)    | 891 (21.4)    | 2,137 (25.9)    |
| 60-69                                                                                   | 4,797 (24.9)           | 3,091 (21.3)    | 1,165 (28.0)  | 2,238 (27.1)    |
| 70-79                                                                                   | 4,825 (25.1)           | 3,283 (22.6)    | 669 (16.1)    | 1,169 (14.2)    |
| 80-                                                                                     | 2,460 (12.8)           | 2,638 (18.2)    | 226 (5.4)     | 448 (5.4)       |
| Total                                                                                   | 19,249 (100)           | 14,514 (100)    | 4,154 (100)   | 8,257 (100)     |
| Mean (SD)                                                                               | 61.7 (17.2)            | 61.9 (18.9)     | 56.8 (16.1)   | 56.9 (15.0)     |
| Patients of department not specified (subgroup C) <sup>d</sup>                          |                        |                 |               |                 |
| 0-9                                                                                     | 2,278 (1.5)            | 2,131 (1.9)     | 307 (0.9)     | 300 (0.5)       |
| 10-19                                                                                   | 3,083 (2.0)            | 3,543 (3.2)     | 563 (1.7)     | 752 (1.2)       |
| 20-29                                                                                   | 6,723 (4.4)            | 6,867 (6.2)     | 1,464 (4.3)   | 2,830 (4.5)     |
| 30-39                                                                                   | 18,934 (12.3)          | 15,571 (14.1)   | 3,837 (11.4)  | 7,003 (11.1)    |
| 40-49                                                                                   | 22,917 (14.9)          | 14,230 (12.9)   | 5,409 (16.0)  | 9,682 (15.4)    |
| 50-59                                                                                   | 28,231 (18.4)          | 17,448 (15.8)   | 7,481 (22.1)  | 16,243 (25.9)   |
| 60-69                                                                                   | 33,911 (22.1)          | 19,526 (17.7)   | 8,368 (24.8)  | 15,557 (24.8)   |
| 70-79                                                                                   | 25,892 (16.9)          | 17,807 (16.2)   | 4,763 (14.1)  | 7,897 (12.6)    |
| 80-                                                                                     | 11,635 (7.6)           | 13,000 (11.8)   | 1,597 (4.7)   | 2,565 (4.1)     |
| Total                                                                                   | 153,604 (100)          | 110,123 (100)   | 33,789 (100)  | 62,829 (100)    |
| Mean (SD)                                                                               | 55.6 (18.0)            | 54.9 (20.3)     | 54.9 (16.4)   | 54.9 (15.4)     |

## Supplementary Table S1 -- continued

a Patients with both of diagnosis codes of psoriasis and PPP are classified as those with psoriasis.

b Patients with at least one claim with diagnosis code of psoriasis or PPP where the department was specified as dermatology or rheumatology during the 12-month observation period.

c Patients with a diagnosis code of psoriasis or PPP where the department was specified as that other specialty but not as dermatology or rheumatology.

d Patients with a diagnosis code of psoriasis or PPP where the department was not specified.

PPP, palmoplantar pustulosis.

## Supplementary Table S2

Diagnosis codes of psoriasis and PPP classified by the department specified in a claim in Japanese National Database

|                                      | Department         |                     |                               |                                 | Not specified <sup>e</sup> | All patients   |
|--------------------------------------|--------------------|---------------------|-------------------------------|---------------------------------|----------------------------|----------------|
|                                      | Specified          |                     |                               |                                 |                            |                |
|                                      | Derma <sup>a</sup> | Rheuma <sup>b</sup> | Derma/<br>rheuma <sup>c</sup> | Other<br>specialty <sup>d</sup> | N <sup>f</sup>             | N <sup>f</sup> |
|                                      | N <sup>f</sup>     | N <sup>f</sup>      | N <sup>f</sup>                | N <sup>f</sup>                  | N <sup>f</sup>             | N <sup>f</sup> |
|                                      | (%)                | (%)                 | (%)                           | (%)                             | (%)                        | (%)            |
| Psoriasis                            | 130,953            | 2,301               | 132,189                       | 33,763                          | 263,727                    | 429,679        |
|                                      | (100)              | (100)               | (100)                         | (100)                           | (100)                      | (100)          |
| Plaque psoriasis                     | 127,170            | 1,602               | 127,822                       | 30,808                          | 260,075                    | 418,705        |
|                                      | (97.1)             | (69.6)              | (96.7)                        | (96.5)                          | (98.6)                     | (97.4)         |
| Psoriasis vulgaris                   | 103,573            | 1,161               | 104,002                       | 20,202                          | 214,621                    | 338,825        |
|                                      | (79.1)             | (50.5)              | (78.7)                        | (59.8)                          | (81.4)                     | (78.9)         |
| Psoriasis                            | 20,972             | 528                 | 21,231                        | 11,159                          | 44,821                     | 77,302         |
|                                      | (16.0)             | (22.9)              | (16.1)                        | (33.1)                          | (17.0)                     | (18.0)         |
| Psoriasis vulgaris of<br>entire body | 7,262              | 66                  | 7,267                         | 579                             | 2,030                      | 9,876          |
|                                      | (5.5)              | (2.9)               | (5.5)                         | (1.7)                           | (0.8)                      | (2.3)          |
| Psoriasis of extremities             | 387                | --- <sup>g</sup>    | 390                           | 99                              | 411                        | 900            |
|                                      | (0.3)              |                     | (0.3)                         | (0.3)                           | (0.2)                      | (0.2)          |
| Psoriasis vulgaris of<br>extremities | 3,210              | 24                  | 3,214                         | 371                             | 2,417                      | 6,002          |
|                                      | (2.5)              | (1.0)               | (2.4)                         | (1.1)                           | (0.9)                      | (1.4)          |
| Psoriasis vulgaris of<br>lower back  | 144                | --- <sup>g</sup>    | 144                           | 38                              | 74                         | 256            |
|                                      | (0.1)              |                     | (0.1)                         | (0.1)                           | (0.03)                     | (0.1)          |
| Plaque psoriasis                     | 70                 | --- <sup>g</sup>    | 70                            | 11                              | 33                         | 114            |
|                                      | (0.1)              |                     | (0.1)                         | (0.03)                          | (0.01)                     | (0.03)         |

Supplementary Table S2 ---continued

|                                              | Department            |                       |                               |                                 | Not specified <sup>e</sup> | All patients          |
|----------------------------------------------|-----------------------|-----------------------|-------------------------------|---------------------------------|----------------------------|-----------------------|
|                                              | Specified             |                       | Derma/<br>rheuma <sup>c</sup> | Other<br>specialty <sup>d</sup> |                            |                       |
|                                              | Derma <sup>a</sup>    | Rheuma <sup>b</sup>   |                               |                                 |                            |                       |
|                                              | N <sup>f</sup><br>(%) | N <sup>f</sup><br>(%) | N <sup>f</sup><br>(%)         | N <sup>f</sup><br>(%)           | N <sup>f</sup><br>(%)      | N <sup>f</sup><br>(%) |
| Scalp psoriasis                              | 1,177<br>(0.9)        | --- <sup>g</sup>      | 1,180<br>(0.9)                | 257<br>(0.8)                    | 1,395<br>(0.5)             | 2,832<br>(0.7)        |
| Seborrheic psoriasis <sup>h</sup>            | 123<br>(0.1)          | --- <sup>g</sup>      | 123<br>(0.1)                  | 118<br>(0.3)                    | 350<br>(0.1)               | 591<br>(0.1)          |
| Psoriasis vulgaris of<br>scalp               | 1,055<br>(0.8)        | --- <sup>g</sup>      | 1,058<br>(0.8)                | 140<br>(0.4)                    | 1,046<br>(0.4)             | 2,244<br>(0.5)        |
| Guttate psoriasis                            | 1,241<br>(0.9)        | --- <sup>g</sup>      | 1,242<br>(0.9)                | 137<br>(0.4)                    | 1,193<br>(0.5)             | 2,572<br>(0.6)        |
| Psoriatic arthritis                          | 3,774<br>(2.9)        | 1,210<br>(52.6)       | 4,530<br>(3.4)                | 2,128<br>(6.3)                  | 1,702<br>(0.6)             | 8,360<br>(1.9)        |
| Psoriatic arthritis                          | 3,686<br>(2.8)        | 960<br>(41.7)         | 4,206<br>(3.2)                | 1,529<br>(4.5)                  | 1,410<br>(0.5)             | 7,145<br>(1.7)        |
| Psoriatic arthritis<br>mutilans <sup>i</sup> | 63<br>(0.05)          | 244<br>(10.6)         | 292<br>(0.2)                  | 575<br>(1.7)                    | 272<br>(0.1)               | 1,139<br>(0.3)        |
| Psoriatic spondylitis                        | 82<br>(0.1)           | 24<br>(1.0)           | 93<br>(0.1)                   | 45<br>(0.1)                     | 25<br>(0.01)               | 163<br>(0.04)         |
| Pustular psoriasis                           | 2,941<br>(2.2)        | 67<br>(2.9)           | 2,953<br>(2.2)                | 409<br>(1.2)                    | 1,274<br>(0.5)             | 4,636<br>(1.1)        |
| Pustular psoriasis                           | 2,595<br>(2.0)        | 62<br>(2.7)           | 2,606<br>(2.0)                | 238<br>(0.7)                    | 822<br>(0.3)               | 3,666<br>(0.9)        |
| Impetigo herpetiformis <sup>j</sup>          | 128<br>(0.1)          | --- <sup>g</sup>      | 128<br>(0.1)                  | 160<br>(0.5)                    | 255<br>(0.1)               | 543<br>(0.1)          |

Supplementary Table S2 ---continued

|                                         | Department            |                       |                               |                                 | Not specified <sup>e</sup> | All patients          |
|-----------------------------------------|-----------------------|-----------------------|-------------------------------|---------------------------------|----------------------------|-----------------------|
|                                         | Specified             |                       |                               |                                 |                            |                       |
|                                         | Derma <sup>a</sup>    | Rheuma <sup>b</sup>   | Derma/<br>rheuma <sup>c</sup> | Other<br>specialty <sup>d</sup> |                            |                       |
|                                         | N <sup>f</sup><br>(%) | N <sup>f</sup><br>(%) | N <sup>f</sup><br>(%)         | N <sup>f</sup><br>(%)           | N <sup>f</sup><br>(%)      | N <sup>f</sup><br>(%) |
| Acrodermatitis continua                 | 242<br>(0.2)          | --- <sup>g</sup>      | 243<br>(0.2)                  | 12<br>(0.04)                    | 199<br>(0.1)               | 454<br>(0.1)          |
| Generalized pustular<br>psoriasis       | 28<br>(0.02)          | --- <sup>g</sup>      | 28<br>(0.02)                  | --- <sup>g</sup>                | --- <sup>g</sup>           | 32<br>(0.01)          |
| Acute generalized pustular<br>Psoriasis | --- <sup>g</sup>      | --- <sup>g</sup>      | --- <sup>g</sup>              | --- <sup>g</sup>                | --- <sup>g</sup>           | --- <sup>g</sup>      |
| Erythrodermic psoriasis                 | 1,045<br>(0.8)        | 35<br>(1.5)           | 1,057<br>(0.8)                | 223<br>(0.7)                    | 330<br>(0.1)               | 1610<br>(0.4)         |
| PPP                                     | 6,170<br>(4.7)        | 82<br>(3.6)           | 6,194<br>(4.7)                | 811<br>(2.4)                    | 5,620<br>(2.1)             | 12,625<br>(2.9)       |
| PAO <sup>k</sup>                        | 173<br>(0.1)          | 21<br>(0.9)           | 180<br>(0.1)                  | 73<br>(0.2)                     | 146<br>(0.1)               | 401<br>(0.1)          |
| PPP                                     | 26,928<br>(100)       | 435<br>(100)          | 27,195<br>(100)               | 12,411<br>(100)                 | 96,618<br>(100)            | 136,224<br>(100)      |
| PPP                                     | 26,880<br>(99.8)      | 394<br>(90.6)         | 27,109<br>(99.7)              | 11,979<br>(96.5)                | 96,559<br>(99.9)           | 135,647<br>(99.6)     |
| PAO <sup>l</sup>                        | 689<br>(2.6)          | 112<br>(25.7)         | 762<br>(2.8)                  | 3,268<br>(26.3)                 | 1,704<br>(1.8)             | 5,734<br>(4.2)        |

## Supplementary Table S2 -- continued

a Patients with at least one claim with a diagnosis code of psoriasis or PPP where the department was specified as dermatology during the 12-month observation period.

b Patients with at least one claim where the department was specified as rheumatology.

c Patients with at least one claim where the department was specified as dermatology or rheumatology (department subgroup A).

d Patients with any claim where the department was specified as other specialty but not dermatology or rheumatology (department subgroup B).

e Patients with claims where the department was not specified (department subgroup C).

f One patient is counted once for each code and for subclass of diagnosis and therefore sum of lower categories may exceed a total of upper category.

g Less than 10 patients were found.

h "Internal medicine" was specified for 68 (58%) of 118 patients with "Seborrheic psoriasis" in the department of other specialty.

i "Orthopedics" was specified for 470 (82%) of 575 patients with "Psoriatic arthritis mutilans" in the department of other specialty.

j "Internal medicine" was specified for 61 (38%) of 160 patients with "Impetigo herpetiformis" in the department of other specialty.

k "Internal medicine" was specified for 54 (74%) of 73 patients with "PAO" in the department of other specialty under the broad disease category of psoriasis.

l "Internal medicine" was specified for 2978 (91%) of 3268 patients with "PAO" in the department of other specialty under the broad disease category of PPP.

PPP, palmoplantar pustulosis; PAO, pustulotic arthro-osteitis.

**Supplementary Table S3**

Use of healthcare service in each of 12 months during the study period in patients with psoriasis and PPP subdivided by the department in a claim with diagnosis code of psoriasis and PPP in Japanese National Database

| Year and Month          | All            |       | Dermatology<br>or rheumatology<br>(subgroup A) |       | Other<br>specialty<br>(subgroup B) |       | Department<br>not specified<br>(subgroup C) |       |
|-------------------------|----------------|-------|------------------------------------------------|-------|------------------------------------|-------|---------------------------------------------|-------|
|                         | N <sup>b</sup> | %     | N <sup>b</sup>                                 | %     | N <sup>b</sup>                     | %     | N <sup>b</sup>                              | %     |
| Patients with Psoriasis |                |       |                                                |       |                                    |       |                                             |       |
| 2010 April              | 155,927        | 36.3  | 57,385                                         | 43.4  | 15,271                             | 45.2  | 83,271                                      | 31.6  |
| 2010 May                | 157,238        | 36.6  | 57,029                                         | 43.1  | 14,884                             | 44.1  | 85,325                                      | 32.4  |
| 2010 June               | 166,483        | 38.7  | 59,989                                         | 45.4  | 15,409                             | 45.6  | 91,085                                      | 34.5  |
| 2010 July               | 168,831        | 39.3  | 60,186                                         | 45.5  | 15,495                             | 45.9  | 93,150                                      | 35.3  |
| 2010 August             | 161,494        | 37.6  | 59,172                                         | 44.8  | 14,974                             | 44.4  | 87,348                                      | 33.1  |
| 2010 September          | 162,322        | 37.8  | 59,257                                         | 44.8  | 15,182                             | 45.0  | 87,883                                      | 33.3  |
| 2010 October            | 167,886        | 39.1  | 59,960                                         | 45.4  | 15,148                             | 44.9  | 92,778                                      | 35.2  |
| 2010 November           | 168,288        | 39.2  | 60,074                                         | 45.4  | 15,295                             | 45.3  | 92,919                                      | 35.2  |
| 2010 December           | 176,910        | 41.2  | 62,093                                         | 47.0  | 15,562                             | 46.1  | 99,255                                      | 37.6  |
| 2011 January            | 164,580        | 38.3  | 59,920                                         | 45.3  | 15,067                             | 44.6  | 89,593                                      | 34.0  |
| 2011 February           | 165,743        | 38.6  | 58,425                                         | 44.2  | 14,937                             | 44.2  | 92,381                                      | 35.0  |
| 2011 March              | 177,900        | 41.4  | 62,591                                         | 47.3  | 15,968                             | 47.3  | 99,341                                      | 37.7  |
| Total                   | 429,679        | 100.0 | 132,189                                        | 100.0 | 33,763                             | 100.0 | 263,727                                     | 100.0 |

Supplementary Table S3 -- continued

| Year and Month    | All            |       | Dermatology<br>or rheumatology<br>(subgroup A) |       | Other<br>specialty<br>(subgroup B) |       | Department<br>not specified<br>(subgroup C) |       |
|-------------------|----------------|-------|------------------------------------------------|-------|------------------------------------|-------|---------------------------------------------|-------|
|                   | N <sup>b</sup> | %     | N <sup>b</sup>                                 | %     | N <sup>b</sup>                     | %     | N <sup>b</sup>                              | %     |
| Patients with PPP |                |       |                                                |       |                                    |       |                                             |       |
| 2010 April        | 41,825         | 30.7  | 9,388                                          | 34.5  | 4,747                              | 38.2  | 27,690                                      | 28.7  |
| 2010 May          | 45,888         | 33.7  | 9,912                                          | 36.4  | 4,523                              | 36.4  | 31,453                                      | 32.6  |
| 2010 June         | 52,193         | 38.3  | 11,172                                         | 41.1  | 5,045                              | 40.6  | 35,976                                      | 37.2  |
| 2010 July         | 55,463         | 40.7  | 11,508                                         | 42.3  | 5,126                              | 41.3  | 38,829                                      | 10.2  |
| 2010 August       | 52,850         | 38.8  | 11,329                                         | 41.7  | 4,903                              | 39.5  | 36,618                                      | 37.9  |
| 2010 September    | 52,649         | 38.6  | 11,375                                         | 41.8  | 5,065                              | 40.8  | 36,209                                      | 37.5  |
| 2010 October      | 52,229         | 38.3  | 11,193                                         | 41.2  | 4,988                              | 40.2  | 36,048                                      | 37.3  |
| 2010 November     | 48,962         | 35.9  | 10,464                                         | 38.5  | 4,753                              | 38.3  | 33,745                                      | 34.9  |
| 2010 December     | 49,679         | 36.5  | 10,606                                         | 39.0  | 4,757                              | 38.3  | 34,316                                      | 35.5  |
| 2011 January      | 43,971         | 32.3  | 9,801                                          | 36.0  | 4,432                              | 35.7  | 29,738                                      | 30.8  |
| 2011 February     | 44,373         | 32.6  | 9,603                                          | 35.3  | 4,461                              | 35.9  | 30,309                                      | 31.4  |
| 2011 March        | 47,678         | 35.0  | 10,289                                         | 37.8  | 4,716                              | 38.0  | 32,673                                      | 33.8  |
| Total             | 136,224        | 100.0 | 27,195                                         | 100.0 | 12,411                             | 100.0 | 96,618                                      | 100.0 |

a Patients with at least one claim with diagnosis code of psoriasis or PPP where the department was specified as either dermatology or rheumatology (“Dermatology or rheumatology”) or other specialty but not dermatology or rheumatology (“Other specialty”) during the 12-month observation period.

b Number of patients with a claim with a diagnosis code of psoriasis or PPP. PPP, palmoplantar pustulosis.



## Supplementary Table S4

Seasonal variation of use of healthcare service in patients with a diagnosis code of psoriasis and PPP in Japanese National Database

|                                                                     | Use of health-care service |                             | Psoriasis                |       | PPP                  |       |
|---------------------------------------------------------------------|----------------------------|-----------------------------|--------------------------|-------|----------------------|-------|
|                                                                     | 2010 July<br>or August     | 2011 January<br>or February | N <sup>a</sup>           | %     | N <sup>a</sup>       | %     |
| All patients                                                        |                            |                             |                          |       |                      |       |
| Yes                                                                 | Yes                        |                             | 147,254                  | 34.3  | 41,153               | 30.2  |
| Yes                                                                 | No                         |                             | 78,956                   | 18.4  | 34,229               | 25.1  |
| No                                                                  | Yes                        |                             | 80,384                   | 18.7  | 20,548               | 15.1  |
| No                                                                  | No                         |                             | 123,085                  | 28.6  | 40,294               | 29.6  |
| Total                                                               |                            |                             | 429,679                  | 100.0 | 136,224              | 100.0 |
| Difference (95% CI) <sup>b</sup>                                    |                            |                             | -0.33% (-0.51 to -0.15%) |       | 10.0% (9.8 to 10.3%) |       |
| P value <sup>c</sup>                                                |                            |                             | 0.0004                   |       | <0.0001              |       |
| Patients of dermatology or rheumatology (subgroup A) <sup>d</sup>   |                            |                             |                          |       |                      |       |
| Yes                                                                 | Yes                        |                             | 58,962                   | 44.6  | 9,905                | 36.4  |
| Yes                                                                 | No                         |                             | 22,384                   | 16.9  | 6,267                | 23.0  |
| No                                                                  | Yes                        |                             | 22,328                   | 16.9  | 4,164                | 15.3  |
| No                                                                  | No                         |                             | 28,515                   | 21.6  | 6,859                | 25.2  |
| Total                                                               |                            |                             | 132,189                  | 100.0 | 27,195               | 100.0 |
| Difference (95% CI) <sup>b</sup>                                    |                            |                             | 0.04% (-0.27 to 0.36%)   |       | 7.7% (7.1 to 8.4%)   |       |
| P value <sup>c</sup>                                                |                            |                             | 0.79                     |       | <0.0001              |       |
| Patients of department of other specialty (subgroup B) <sup>e</sup> |                            |                             |                          |       |                      |       |
| Yes                                                                 | Yes                        |                             | 14,223                   | 42.1  | 4,596                | 37.0  |
| Yes                                                                 | No                         |                             | 5,714                    | 16.9  | 2,615                | 21.1  |
| No                                                                  | Yes                        |                             | 5,497                    | 16.3  | 1,790                | 14.4  |
| No                                                                  | No                         |                             | 8,329                    | 24.7  | 3,410                | 27.5  |
| Total                                                               |                            |                             | 33,763                   | 100.0 | 12,411               | 100.0 |
| Difference (95% CI) <sup>b</sup>                                    |                            |                             | 0.64% (0.03 to 1.25%)    |       | 6.6% (5.7 to 7.6%)   |       |
| P value <sup>c</sup>                                                |                            |                             | 0.04                     |       | <0.0001              |       |

Supplementary Table S4 --- continued

| Use of health-care service                                     |                             | Psoriasis                |       | PPP                   |       |
|----------------------------------------------------------------|-----------------------------|--------------------------|-------|-----------------------|-------|
| 2010 July<br>or August                                         | 2011 January<br>or February | N <sup>a</sup>           | %     | N <sup>a</sup>        | %     |
| Patients of department not specified (subgroup C) <sup>f</sup> |                             |                          |       |                       |       |
| Yes                                                            | Yes                         | 74,069                   | 32.7  | 26,652                | 27.6  |
| Yes                                                            | No                          | 50,858                   | 19.9  | 25,347                | 26.2  |
| No                                                             | Yes                         | 52,559                   | 19.3  | 14,594                | 15.1  |
| No                                                             | No                          | 86,241                   | 28.0  | 30,025                | 31.1  |
| Total                                                          |                             | 263,727                  | 100.0 | 96,618                | 100.0 |
| Difference (95% CI) <sup>b</sup>                               |                             | -0.64% (-0.88 to -0.40%) |       | 11.1% (10.8 to 11.5%) |       |
| P value <sup>b</sup>                                           |                             | <0.0001                  |       | <0.0001               |       |

a Number of patients with a claim with a diagnosis code of psoriasis or PPP.

b Difference between the proportion of patients who used the healthcare service in the hottest season (July or August 2010) and the proportion of patients who used the service in the coldest season (January or February of 2011).

c The result of paired t-test is shown.

d Patients with at least one claim with diagnosis code of psoriasis or PPP where the department was specified as dermatology or rheumatology during the 12-month observation period.

e Patients with a diagnosis code of psoriasis or PPP where the department was specified as other specialty but not as dermatology or rheumatology.

f Patients with a diagnosis code of psoriasis or PPP where the department was not specified.

PPP, palmoplantar pustulosis.

## Supplementary Table S5

Treatments for psoriasis and PPP subdivided by the department specified in a claim with a diagnosis code of psoriasis and PPP in Japanese National Database

|                        | Psoriasis             |                   |                        |                 | PPP                   |                  |                |                |
|------------------------|-----------------------|-------------------|------------------------|-----------------|-----------------------|------------------|----------------|----------------|
|                        |                       | Male              | Psoriatic<br>arthritis |                 |                       | Male             | PAO            |                |
|                        | N <sup>a</sup><br>(%) | N<br>(%)          | Age<br>(SD)            | N<br>(%)        | N <sup>a</sup><br>(%) | N<br>(%)         | Age<br>(SD)    | N<br>(%)       |
| All patients           |                       | N=429,679         |                        |                 | N=136,224             |                  |                |                |
| Systemic therapy       |                       |                   |                        |                 |                       |                  |                |                |
| Biologics              | 3,291<br>(0.8)        | 2,132<br>(64.8)   | 48.9<br>(14.1)         | 1,111<br>(33.8) | 253<br>(0.2)          | 65<br>(25.7)     | 53.2<br>(13.6) | 20<br>(7.9)    |
| Methotrexate           | 1,680<br>(0.4)        | 1,072<br>(63.8)   | 52.0<br>(15.5)         | 480<br>(28.6)   | 174<br>(0.1)          | 53<br>(30.5)     | 54.6<br>(13.4) | 19<br>(10.9)   |
| Ciclosporin            | 21,997<br>(5.1)       | 13,813<br>(62.8)  | 53.2<br>(16.2)         | 1,604<br>(7.3)  | 251<br>(0.2)          | 98<br>(39.0)     | 52.9<br>(13.8) | 20<br>(8.0)    |
| Etretinate             | 15,481<br>(3.6)       | 11,025<br>(71.2)  | 60.1<br>(13.6)         | 609<br>(3.9)    | 1,950<br>(1.4)        | 725<br>(37.2)    | 57.5<br>(11.7) | 35<br>(1.8)    |
| Phototherapy           | 21,005<br>(4.9)       | 12,370<br>(58.9)  | 54.6<br>(18.1)         | 309<br>(1.5)    | 10,408<br>(7.6)       | 3,657<br>(35.1)  | 53.3<br>(15.0) | 156<br>(1.5)   |
| Topical therapy        |                       |                   |                        |                 |                       |                  |                |                |
| Topical vitamin D      | 256,122<br>(59.6)     | 156,050<br>(60.9) | 53.4<br>(18.5)         | 3,698<br>(1.4)  | 42,903<br>(31.5)      | 14,276<br>(33.3) | 53.0<br>(14.9) | 612<br>(1.4)   |
| Topical corticosteroid | 349,568<br>(81.4)     | 211,744<br>(60.6) | 54.9<br>(18.1)         | 5,323<br>(1.5)  | 109,692<br>(80.5)     | 37,881<br>(34.5) | 53.4<br>(15.3) | 3,576<br>(3.3) |
| No treatment           | 38,224<br>(8.9)       | 19,393<br>(50.7)  | 58.6<br>(19.5)         | 1,851<br>(4.8)  | 21,209<br>(15.6)      | 7,527<br>(35.5)  | 54.6<br>(16.2) | 2,083<br>(9.8) |

Supplementary Table S5 --- continued

|                                                                   | Psoriasis         |                  |                |                | PPP              |                 |                |              |
|-------------------------------------------------------------------|-------------------|------------------|----------------|----------------|------------------|-----------------|----------------|--------------|
|                                                                   | N <sup>a</sup>    | Male             | Psoriatic      |                | N <sup>a</sup>   | Male            | PAO            |              |
|                                                                   |                   |                  | Age            | N              |                  |                 | Age            | N            |
| (%)                                                               | (%)               | (SD)             | (%)            | (%)            | (%)              | (SD)            | (%)            |              |
| Patients of dermatology or rheumatology (subgroup A) <sup>b</sup> |                   |                  |                |                |                  |                 |                |              |
|                                                                   | N=132,189         |                  |                |                | N=27,195         |                 |                |              |
| Systemic therapy                                                  |                   |                  |                |                |                  |                 |                |              |
| Biologics                                                         | 2,674<br>(2.0)    | 1,827<br>(68.3)  | 48.4<br>(13.8) | 895<br>(33.5)  | 112<br>(0.4)     | 28<br>(25.0)    | 54.5<br>(11.9) | --c          |
| Methotrexate                                                      | 681<br>(0.5)      | 436<br>(64.0)    | 51.1<br>(15.6) | 280<br>(41.1)  | 67<br>(0.2)      | 14<br>(20.9)    | 51.8<br>(13.0) | 13<br>(19.4) |
| Ciclosporin                                                       | 12,330<br>(9.3)   | 7,917<br>(64.2)  | 52.8<br>(15.8) | 1,023<br>(8.3) | 109<br>(0.4)     | 37<br>(33.9)    | 54.4<br>(11.9) | --c          |
| Etretinate                                                        | 9,010<br>(6.8)    | 6,387<br>(70.9)  | 60.6<br>(13.5) | 501<br>(5.6)   | 744<br>(2.7)     | 271<br>(36.4)   | 57.4<br>(10.7) | 26<br>(3.5)  |
| Phototherapy                                                      | 5,465<br>(4.1)    | 3,352<br>(61.3)  | 56.4<br>(16.9) | 181<br>(3.3)   | 1,529<br>(5.6)   | 498<br>(32.6)   | 53.9<br>(14.2) | 43<br>(2.8)  |
| Topical therapy                                                   |                   |                  |                |                |                  |                 |                |              |
| Topical vitamin D                                                 | 86,201<br>(65.2)  | 54,802<br>(63.6) | 55.9<br>(17.7) | 2,736<br>(3.2) | 11,194<br>(41.2) | 3,737<br>(33.4) | 54.9<br>(14.0) | 365<br>(3.3) |
| Topical corticosteroid                                            | 112,813<br>(85.3) | 70,655<br>(62.6) | 56.8<br>(17.3) | 3,580<br>(3.2) | 23,415<br>(86.1) | 8,006<br>(34.2) | 55.3<br>(14.3) | 623<br>(2.7) |
| No treatment                                                      | 7,621<br>(5.8)    | 3,809<br>(50.0)  | 54.8<br>(19.7) | 448<br>(5.9)   | 2,732<br>(10.0)  | 941<br>(34.4)   | 55.3<br>(14.5) | 114<br>(4.2) |

Supplementary Table S5 --- continued

|                                                                  | Psoriasis             |                  |                        |               | PPP                   |                 |                |                 |
|------------------------------------------------------------------|-----------------------|------------------|------------------------|---------------|-----------------------|-----------------|----------------|-----------------|
|                                                                  | N <sup>a</sup><br>(%) | Male             | Psoriatic<br>arthritis |               | N <sup>a</sup><br>(%) | Male            | PAO            |                 |
|                                                                  |                       | N<br>(%)         | Age<br>(SD)            | N<br>(%)      |                       | N<br>(%)        | Age<br>(SD)    | N<br>(%)        |
| Patients of department other specialty (subgroup B) <sup>d</sup> |                       |                  |                        |               |                       |                 |                |                 |
|                                                                  | N=33,763              |                  |                        |               | N=12,411              |                 |                |                 |
| Systemic therapy                                                 |                       |                  |                        |               |                       |                 |                |                 |
| Biologics                                                        | 294<br>(0.9)          | 163<br>(55.4)    | 49.5<br>(15.0)         | 155<br>(52.7) | 51<br>(0.4)           | 12<br>(23.5)    | 51.9<br>(11.8) | 11<br>(21.6)    |
| Methotrexate                                                     | 265<br>(0.8)          | 146<br>(55.1)    | 50.3<br>(16.3)         | 133<br>(50.2) | 38<br>(0.3)           | 15<br>(39.5)    | 56.7<br>(11.9) | -- <sup>c</sup> |
| Ciclosporin                                                      | 2,474<br>(7.3)        | 1,247<br>(50.4)  | 57.5<br>(16.0)         | 350<br>(14.1) | 38<br>(0.3)           | 13<br>(34.2)    | 54.1<br>(16.2) | 10<br>(26.3)    |
| Etretinate                                                       | 650<br>(1.9)          | 462<br>(71.1)    | 63.3<br>(13.5)         | 27<br>(4.2)   | 72<br>(0.6)           | 21<br>(29.2)    | 57.1<br>(11.8) | -- <sup>c</sup> |
| Phototherapy                                                     | 689<br>(2.0)          | 415<br>(60.2)    | 61.0<br>(16.7)         | 36<br>(5.2)   | 386<br>(3.1)          | 135<br>(35.0)   | 54.1<br>(14.8) | 74<br>(19.2)    |
| Topical therapy                                                  |                       |                  |                        |               |                       |                 |                |                 |
| Topical vitamin D                                                | 11,608<br>(34.4)      | 7,379<br>(63.6)  | 58.6<br>(17.3)         | 391<br>(3.4)  | 1,832<br>(14.8)       | 579<br>(31.6)   | 54.3<br>(14.7) | 153<br>(8.4)    |
| Topical corticosteroid                                           | 19,804<br>(58.7)      | 12,008<br>(60.6) | 59.1<br>(18.4)         | 869<br>(4.4)  | 7,037<br>(56.7)       | 2,304<br>(32.7) | 54.1<br>(15.7) | 1,858<br>(26.4) |
| No treatment                                                     | 9,906<br>(29.3)       | 5,121<br>(51.7)  | 62.1<br>(17.0)         | 921<br>(9.3)  | 5,005<br>(40.3)       | 1,735<br>(34.7) | 55.9<br>(14.9) | 1,391<br>(27.8) |

Supplementary Table S5 --- continued

|                                                                | Psoriasis             |                   |                        |              | PPP                   |                  |                |                |
|----------------------------------------------------------------|-----------------------|-------------------|------------------------|--------------|-----------------------|------------------|----------------|----------------|
|                                                                | N <sup>a</sup><br>(%) | Male              | Psoriatic<br>arthritis |              | N <sup>a</sup><br>(%) | Male             | PAO            |                |
|                                                                |                       | N<br>(%)          | Age<br>(SD)            | N<br>(%)     |                       | N<br>(%)         | Age<br>(SD)    | N<br>(%)       |
| Patients of department not specified (subgroup C) <sup>e</sup> |                       |                   |                        |              |                       |                  |                |                |
|                                                                | N=263,727             |                   |                        |              | N=96,618              |                  |                |                |
| Systemic therapy                                               |                       |                   |                        |              |                       |                  |                |                |
| Biologics                                                      | 323<br>(0.1)          | 142<br>(44.0)     | 52.5<br>(15.0)         | 61<br>(18.9) | 90<br>(0.1)           | 25<br>(27.8)     | 52.3<br>(16.3) | --c            |
| Methotrexate                                                   | 734<br>(0.3)          | 490<br>(66.8)     | 53.5<br>(15.0)         | 67<br>(9.1)  | 69<br>(0.1)           | 24<br>(34.8)     | 56.2<br>(14.3) | --c            |
| Ciclosporin                                                    | 7,193<br>(2.7)        | 4,649<br>(64.6)   | 52.4<br>(16.7)         | 231<br>(3.2) | 104<br>(0.1)          | 48<br>(46.2)     | 50.8<br>(14.5) | --c            |
| Etretinate                                                     | 5,821<br>(2.2)        | 4,176<br>(71.7)   | 59.0<br>(13.6)         | 81<br>(1.4)  | 1,134<br>(1.2)        | 433<br>(38.2)    | 57.6<br>(12.4) | --c            |
| Phototherapy                                                   | 14,851<br>(5.6)       | 8,603<br>(57.9)   | 53.6<br>(18.5)         | 92<br>(0.6)  | 8,493<br>(8.8)        | 3,024<br>(35.6)  | 53.1<br>(15.1) | 39<br>(0.5)    |
| Topical therapy                                                |                       |                   |                        |              |                       |                  |                |                |
| Topical vitamin D                                              | 158,313<br>(60.0)     | 93,869<br>(59.3)  | 51.6<br>(18.8)         | 571<br>(0.4) | 29,877<br>(30.9)      | 9,960<br>(33.3)  | 52.2<br>(15.1) | 94<br>(0.3)    |
| Topical corticosteroid                                         | 216,951<br>(82.3)     | 129,081<br>(59.5) | 53.5<br>(18.3)         | 874<br>(0.4) | 79,240<br>(82.0)      | 27,571<br>(34.8) | 52.8<br>(15.4) | 1,095<br>(1.4) |
| No treatment                                                   | 20,697<br>(7.8)       | 10,463<br>(50.6)  | 58.3<br>(20.3)         | 482<br>(2.3) | 13,472<br>(13.9)      | 4,851<br>(36.0)  | 53.9<br>(16.9) | 578<br>(4.3)   |

1  
2  
3  
4  
5 Supplementary Table S5 -- continued

6 a One patient is counted once for each treatment.

7  
8 b Patients with at least one claim with a diagnosis code of psoriasis or PPP where the  
9 department was specified as dermatology or rheumatology during the 12-month  
10 observation period.

11 c Less than 10 patients had the treatment.

12 d Patients with a diagnosis code of psoriasis or PPP where the department was specified as  
13 other specialty but not as dermatology or rheumatology.

14 e Patients with a diagnosis code of psoriasis or PPP where the department was not  
15 specified.

16  
17 PPP, palmoplantar pustulosis; PAO, pustulotic arthro-osteitis.  
18  
19  
20  
21  
22  
23  
24  
25  
26  
27  
28  
29  
30  
31  
32  
33  
34  
35  
36  
37  
38  
39  
40  
41  
42  
43  
44  
45  
46  
47  
48  
49  
50  
51  
52  
53  
54  
55  
56  
57  
58  
59  
60

## Supplementary Table S6

Prevalence of diabetes mellitus, hyperlipidemia and hypertension in severity classes I to IV of patients with psoriasis and PPP subdivided by the department specified in the claim in Japanese National Database

|                                     | All patients |            | Patients of dermatol or rheumatol <sup>a</sup> |            | Patients of other department <sup>b</sup> |             | Patients of department not specified <sup>c</sup> |            |
|-------------------------------------|--------------|------------|------------------------------------------------|------------|-------------------------------------------|-------------|---------------------------------------------------|------------|
|                                     | Psoriasis    | PPP        | Psoriasis                                      | PPP        | Psoriasis                                 | PPP         | Psoriasis                                         | PPP        |
| Severity Class I (systemic therapy) |              |            |                                                |            |                                           |             |                                                   |            |
| Total N                             | 39,796       | 2,588      | 22,641                                         | 1,009      | 3,520                                     | 194         | 13,635                                            | 1,385      |
| Diabetes mellitus                   |              |            |                                                |            |                                           |             |                                                   |            |
| N <sup>d</sup>                      | 5,271        | 260        | 3,121                                          | 111        | 747                                       | 21          | 1,403                                             | 128        |
| Prevalence <sup>e</sup> (%)         | 12.7         | 9.3        | 13.2                                           | 11.2       | 19.4                                      | 10.9        | 9.5                                               | 7.7        |
| Difference <sup>f</sup> (%)         | 3.1          | 0.8        | 2.1                                            | 1.2        | 5.8                                       | -0.6        | 1.4                                               | 0.3        |
| (95%CI)                             | (2.7,3.4)    | (-0.5,2.1) | (1.6,2.5)                                      | (-1.4,3.9) | (4.5,7.1)                                 | (-5.8,4.6)  | (0.9,1.9)                                         | (-1.1,1.8) |
| Hyperlipidemia                      |              |            |                                                |            |                                           |             |                                                   |            |
| N <sup>d</sup>                      | 8,208        | 557        | 4,725                                          | 239        | 1,003                                     | 32          | 2,480                                             | 286        |
| Prevalence <sup>e</sup> (%)         | 20.7         | 18.3       | 21.1                                           | 20.2       | 25.1                                      | 15.3        | 17.6                                              | 16.6       |
| Difference <sup>f</sup> (%)         | 3.2          | 1.0        | 2.5                                            | 2.0        | 6.2                                       | -2.7        | 1.5                                               | 0.4        |
| (95%CI)                             | (2.8,3.6)    | (-0.6,2.6) | (1.9,3.1)                                      | (-0.9,5.0) | (4.8,7.7)                                 | (-8.2,2.8)  | (0.8,2.1)                                         | (-1.5,2.4) |
| Hypertension                        |              |            |                                                |            |                                           |             |                                                   |            |
| N <sup>d</sup>                      | 11,795       | 576        | 7,150                                          | 230        | 1,235                                     | 38          | 3,410                                             | 308        |
| Prevalence <sup>e</sup> (%)         | 28.5         | 22.4       | 30.5                                           | 22.7       | 30.8                                      | 18.9        | 23.2                                              | 21.6       |
| Difference <sup>f</sup> (%)         | 5.1          | 0.6        | 5.9                                            | 0.0        | 3.4                                       | -5.7        | 1.5                                               | 1.1        |
| (95%CI)                             | (4.7,5.6)    | (-1.0,2.3) | (5.3,6.6)                                      | (-3.0,3.0) | (1.9,4.9)                                 | (-11.9,0.5) | (0.8,2.2)                                         | (-1.0,3.2) |



Supplementary Table S6 -- continued

|                                                           | All patients |             | Patients of<br>dermatol or rheumatol <sup>a</sup><br>(subgroup A) |            | Patients of<br>other department <sup>b</sup><br>(subgroup B) |            | Patients of<br>department not specified <sup>c</sup><br>(subgroup C) |            |
|-----------------------------------------------------------|--------------|-------------|-------------------------------------------------------------------|------------|--------------------------------------------------------------|------------|----------------------------------------------------------------------|------------|
|                                                           | Psoriasis    | PPP         | Psoriasis                                                         | PPP        | Psoriasis                                                    | PPP        | Psoriasis                                                            | PPP        |
| Severity Class II (phototherapy without systemic therapy) |              |             |                                                                   |            |                                                              |            |                                                                      |            |
| Total N                                                   | 18,833       | 10,153      | 4,332                                                             | 1,452      | 614                                                          | 379        | 13,887                                                               | 8,322      |
| Diabetes mellitus                                         |              |             |                                                                   |            |                                                              |            |                                                                      |            |
| N <sup>d</sup>                                            | 1,747        | 686         | 496                                                               | 98         | 89                                                           | 29         | 1,162                                                                | 559        |
| Prevalence <sup>e</sup> (%)                               | 9.0          | 7.7         | 13.2                                                              | 11.2       | 12.0                                                         | 9.6        | 8.0                                                                  | 7.2        |
| Difference <sup>f</sup> (%)                               | -0.6         | -0.8        | 2.1                                                               | 1.2        | -1.6                                                         | -1.8       | -0.1                                                                 | -0.2       |
| (95%CI)                                                   | (-1.0,-0.2)  | (-1.4,-0.2) | (1.6,2.5)                                                         | (-1.4,3.9) | (-4.1,0.8)                                                   | (-4.9,1.3) | (-0.6,0.3)                                                           | (-0.9,0.5) |
| Hyperlipidemia                                            |              |             |                                                                   |            |                                                              |            |                                                                      |            |
| N <sup>d</sup>                                            | 3,125        | 1,731       | 811                                                               | 268        | 131                                                          | 71         | 2,183                                                                | 1,392      |
| Prevalence <sup>e</sup> (%)                               | 16.7         | 17.4        | 21.1                                                              | 20.2       | 17.8                                                         | 16.9       | 15.5                                                                 | 16.5       |
| Difference <sup>f</sup> (%)                               | -0.8         | 0.1         | 2.5                                                               | 2.0        | -1.0                                                         | -1.1       | -0.6                                                                 | 0.3        |
| (95%CI)                                                   | (-1.3,-0.3)  | (-0.7,1.0)  | (1.9,3.1)                                                         | (-0.9,5.0) | (-3.9,1.9)                                                   | (-5.0,2.8) | (-1.2,0.0)                                                           | (-0.6,1.2) |
| Hypertension                                              |              |             |                                                                   |            |                                                              |            |                                                                      |            |
| N <sup>d</sup>                                            | 4,369        | 1,885       | 1,169                                                             | 281        | 196                                                          | 93         | 3,004                                                                | 1,511      |
| Prevalence <sup>e</sup> (%)                               | 22.8         | 21.8        | 30.5                                                              | 22.7       | 23.7                                                         | 23.6       | 21.3                                                                 | 20.7       |
| Difference <sup>f</sup> (%)                               | -0.6         | 0.0         | 5.9                                                               | 0.0        | -3.8                                                         | -1.0       | -0.5                                                                 | 0.3        |
| (95%CI)                                                   | (-1.2,-0.1)  | (-0.9,0.9)  | (5.3,6.6)                                                         | (-3.0,3.0) | (-6.6,-0.9)                                                  | (-5.2,3.2) | (-1.1,0.2)                                                           | (-0.7,1.2) |

Supplementary Table 6 -- continued

|                                           | All patients |         | Patients of<br>dermatol or rheumatol <sup>a</sup><br>(subgroup A) |        | Patients of<br>other department <sup>b</sup><br>(subgroup B) |       | Patients of<br>department not specified <sup>c</sup><br>(subgroup C) |        |
|-------------------------------------------|--------------|---------|-------------------------------------------------------------------|--------|--------------------------------------------------------------|-------|----------------------------------------------------------------------|--------|
|                                           | Psoriasis    | PPP     | Psoriasis                                                         | PPP    | Psoriasis                                                    | PPP   | Psoriasis                                                            | PPP    |
| Severity Class III (topical therapy only) |              |         |                                                                   |        |                                                              |       |                                                                      |        |
| Total N                                   | 332,826      | 102,274 | 97,595                                                            | 22,002 | 19,723                                                       | 6,833 | 215,508                                                              | 73,439 |
| Diabetes mellitus                         |              |         |                                                                   |        |                                                              |       |                                                                      |        |
| N <sup>d</sup>                            | 32,378       | 7,583   | 11,886                                                            | 2,141  | 2,985                                                        | 725   | 17,507                                                               | 4,717  |
| Prevalence <sup>e</sup> (%)               | 9.6          | 8.5     | 11.1                                                              | 10.0   | 13.6                                                         | 11.5  | 8.2                                                                  | 7.4    |
| Difference <sup>f</sup> (%)               | ref          | ref     | ref                                                               | ref    | ref                                                          | ref   | ref                                                                  | ref    |
| Hyperlipidemia                            |              |         |                                                                   |        |                                                              |       |                                                                      |        |
| N <sup>d</sup>                            | 56,561       | 17,783  | 19,006                                                            | 4,434  | 4,206                                                        | 1,315 | 33,289                                                               | 12,034 |
| Prevalence <sup>e</sup> (%)               | 17.5         | 17.3    | 18.6                                                              | 18.2   | 18.9                                                         | 18.0  | 16.1                                                                 | 16.2   |
| Difference <sup>f</sup> (%)               | ref          | ref     | ref                                                               | ref    | ref                                                          | ref   | ref                                                                  | ref    |
| Hypertension                              |              |         |                                                                   |        |                                                              |       |                                                                      |        |
| N <sup>d</sup>                            | 78,996       | 19,322  | 26,307                                                            | 4,781  | 6,484                                                        | 1,548 | 46,205                                                               | 12,993 |
| Prevalence <sup>e</sup> (%)               | 23.4         | 21.7    | 24.5                                                              | 22.7   | 27.4                                                         | 24.6  | 21.7                                                                 | 20.4   |
| Difference <sup>f</sup> (%)               | ref          | ref     | ref                                                               | ref    | ref                                                          | ref   | ref                                                                  | ref    |

Supplementary Table S6 -- continued

|                                  | All patients |           | Patients of<br>dermatol or rheumatol <sup>a</sup> |            | Patients of<br>other department <sup>b</sup> |            | Patients of<br>department not specified <sup>c</sup> |           |
|----------------------------------|--------------|-----------|---------------------------------------------------|------------|----------------------------------------------|------------|------------------------------------------------------|-----------|
|                                  | Psoriasis    | PPP       | Psoriasis                                         | PPP        | Psoriasis                                    | PPP        | Psoriasis                                            | PPP       |
| Severity Class IV (No treatment) |              |           |                                                   |            |                                              |            |                                                      |           |
| Total N                          | 38,224       | 21,209    | 7,621                                             | 2,732      | 9,906                                        | 5,005      | 20,697                                               | 13,472    |
| Diabetes mellitus                |              |           |                                                   |            |                                              |            |                                                      |           |
| N <sup>d</sup>                   | 4,669        | 2,061     | 808                                               | 261        | 1,676                                        | 622        | 2,185                                                | 1,178     |
| Prevalence <sup>e</sup> (%)      | 11.5         | 10.4      | 10.6                                              | 10.1       | 15.1                                         | 13.0       | 9.6                                                  | 9.1       |
| Difference <sup>f</sup> (%)      | 1.9          | 2.0       | -0.6                                              | 0.1        | 1.5                                          | 1.5        | 1.4                                                  | 1.7       |
| (95%CI)                          | (1.6,2.2)    | (1.5,2.4) | (-1.3,0.1)                                        | (-1.2,1.5) | (0.6,2.4)                                    | (0.2,2.8)  | (1.0,1.8)                                            | (1.2,2.3) |
| Hyperlipidemia                   |              |           |                                                   |            |                                              |            |                                                      |           |
| N <sup>d</sup>                   | 7,771        | 4,283     | 1,318                                             | 536        | 2,340                                        | 1,087      | 4,113                                                | 2,660     |
| Prevalence <sup>e</sup> (%)      | 18.9         | 18.6      | 16.7                                              | 17.7       | 19.8                                         | 18.6       | 18.0                                                 | 17.7      |
| Difference <sup>f</sup> (%)      | 1.4          | 1.4       | -2.0                                              | -0.4       | 1.0                                          | 0.6        | 1.9                                                  | 1.5       |
| (95%CI)                          | (1.0,1.8)    | (0.8,2.0) | (-2.8,-1.1)                                       | (-2.0,1.1) | (0.1,1.9)                                    | (-0.9,2.1) | (1.4,2.4)                                            | (0.8,2.2) |
| Hypertension                     |              |           |                                                   |            |                                              |            |                                                      |           |
| N <sup>d</sup>                   | 11,061       | 4,786     | 1,675                                             | 572        | 3,547                                        | 1,293      | 5,839                                                | 2,921     |
| Prevalence <sup>e</sup> (%)      | 25.5         | 23.9      | 21.2                                              | 21.8       | 28.6                                         | 25.6       | 24.0                                                 | 22.4      |
| Difference <sup>f</sup> (%)      | 2.1          | 2.1       | -3.4                                              | -0.9       | 1.2                                          | 1.0        | 2.3                                                  | 2.0       |
| (95%CI)                          | (1.7,2.6)    | (1.5,2.8) | (-4.3,-2.5)                                       | (-2.6,0.9) | (0.2,2.2)                                    | (-0.6,2.5) | (1.7,2.8)                                            | (1.2,2.8) |

## Supplementary Table S6 -- continued

a Patients with at least one claim with a diagnosis code of psoriasis or PPP where the department was specified as dermatology or rheumatology during the 12-month observation period.

b Patients with a diagnosis code of psoriasis or PPP where the department was specified as other specialty but not as dermatology or rheumatology.

c Patients with diagnosis code of psoriasis or PPP where the department was not specified.

d Number of patients with a diagnosis code of the concurrent disease (diabetes mellitus, hyperlipidemia or hypertension) at least in one claim as well as a drug to treat the concurrent disease in the claims issued in 2 or more different months.

e Prevalence was standardized to the distribution of age and sex in the entire study population of 565,903 subjects as in Table 4 in the text.

f Difference of the standardized prevalence between the severity classes I, II and IV and the severity class III (topical treatment only) in each department subgroup.

PPP, palmoplantar pustulosis; CI, confidence interval.

STROBE Statement—Checklist of items that should be included in reports of *cross-sectional studies*

|                              | Item No | Recommendation                                                                                                                                                                                                                                                                                                                                                                                            |
|------------------------------|---------|-----------------------------------------------------------------------------------------------------------------------------------------------------------------------------------------------------------------------------------------------------------------------------------------------------------------------------------------------------------------------------------------------------------|
| <b>Title and abstract</b>    | 1       | (a) Indicate the study's design with a commonly used term in the title or the abstract<br>It is indicated that the study is a nationwide study using database though the term "cross-sectional" itself is not used<br>(b) Provide in the abstract an informative and balanced summary of what was done and what was found<br>In the abstract, the study is summarized in an informative and balanced way. |
| <b>Introduction</b>          |         |                                                                                                                                                                                                                                                                                                                                                                                                           |
| Background/rationale         | 2       | Explain the scientific background and rationale for the investigation being reported<br>Epidemiology of psoriasis/ palmoplantar pustulosis (PPP) in the Western countries and Asia are outlined and the current status of the secondary use of National Database in Japan is mentioned.                                                                                                                   |
| Objectives                   | 3       | State specific objectives, including any prespecified hypotheses<br>This study is descriptive and the objective "to study national prevalence of psoriasis and PPP" is given clearly.                                                                                                                                                                                                                     |
| <b>Methods</b>               |         |                                                                                                                                                                                                                                                                                                                                                                                                           |
| Study design                 | 4       | Present key elements of study design early in the paper<br>It is given that we did a descriptive study using database covering whole nation                                                                                                                                                                                                                                                               |
| Setting                      | 5       | Describe the setting, locations, and relevant dates, including periods of recruitment, exposure, follow-up, and data collection<br>It is given that data for 12-month period (with specified dates) was extracted from Japanese national database to obtain data of patients with psoriasis/PPP.                                                                                                          |
| Participants                 | 6       | (a) Give the eligibility criteria, and the sources and methods of selection of participants<br>It is given that all the patients were identified by the ICD-10 diagnosis code.                                                                                                                                                                                                                            |
| Variables                    | 7       | Clearly define all outcomes, exposures, predictors, potential confounders, and effect modifiers. Give diagnostic criteria, if applicable<br>This is the descriptive study and all the attributes of the patients examined including age, sex, use of health care service, treatments for psoriasis/PPP, comorbidities are specified.                                                                      |
| Data sources/<br>measurement | 8*      | For each variable of interest, give sources of data and details of methods of assessment (measurement). Describe comparability of assessment methods if there is more than one group<br>All the data were obtained from the database and codes for diagnoses, drugs and other treatments used in the study are specified.                                                                                 |
| Bias                         | 9       | Describe any efforts to address potential sources of bias<br>One of major possible biases is misclassification of psoriasis/PPP particularly when the diagnosis was made by non-specialist. It is given that we collected the specialty of the department in a claim with a diagnosis code of psoriasis and PPP issued from a hospital or clinic.                                                         |
| Study size                   | 10      | Explain how the study size was arrived at<br>We did not give sample size calculation as this is the descriptive study to estimate national prevalence of psoriasis/PPP using database covering the whole nation.                                                                                                                                                                                          |
| Quantitative variables       | 11      | Explain how quantitative variables were handled in the analyses. If applicable, describe which groupings were chosen and why                                                                                                                                                                                                                                                                              |

|                     |     |                                                                                                                                                                                                                                                                                                                                                                                                                                                                                                                                                                                                                                                                                                                                                                                                                                                                                                                                                                                                                                                                                  |
|---------------------|-----|----------------------------------------------------------------------------------------------------------------------------------------------------------------------------------------------------------------------------------------------------------------------------------------------------------------------------------------------------------------------------------------------------------------------------------------------------------------------------------------------------------------------------------------------------------------------------------------------------------------------------------------------------------------------------------------------------------------------------------------------------------------------------------------------------------------------------------------------------------------------------------------------------------------------------------------------------------------------------------------------------------------------------------------------------------------------------------|
|                     |     | We gave how quantitative variables were handled clearly in the section of statistical analysis including subgroups used in the study.                                                                                                                                                                                                                                                                                                                                                                                                                                                                                                                                                                                                                                                                                                                                                                                                                                                                                                                                            |
| Statistical methods | 12  | <p>(a) Describe all statistical methods, including those used to control for confounding<br/>In the comparison of comorbidities between subclasses according to severity, in the supplementary tables, we stratified the data by the specialty of the department. It is also clearly given that we used McNemar test to examine the seasonal variation of the use of health care service.</p> <p>(b) Describe any methods used to examine subgroups and interactions<br/>It is given that we examined subgroups classified by the specialty of the department.</p> <p>(c) Explain how missing data were addressed<br/>In this study using the national database, no information is available suggesting potential missing variables and the issue of missing data is not addressed.</p> <p>(d) If applicable, describe analytical methods taking account of sampling strategy<br/>The study is to cover the whole nation and this issue is not applicable.</p> <p>(e) Describe any sensitivity analyses<br/>In this descriptive study, no sensitivity analysis is conducted.</p> |
| <b>Results</b>      |     |                                                                                                                                                                                                                                                                                                                                                                                                                                                                                                                                                                                                                                                                                                                                                                                                                                                                                                                                                                                                                                                                                  |
| Participants        | 13* | <p>(a) Report numbers of individuals at each stage of study—eg numbers potentially eligible, examined for eligibility, confirmed eligible, included in the study, completing follow-up, and analysed<br/>In this study using national database, there was no “stage” which might be seen in the study using the primary data.</p> <p>(b) Give reasons for non-participation at each stage<br/>In this database study, no non-participation occurred.</p> <p>(c) Consider use of a flow diagram<br/>Due to the nature of the study, we did not judge it is needed to use a flow diagram.</p>                                                                                                                                                                                                                                                                                                                                                                                                                                                                                      |
| Descriptive data    | 14* | <p>(a) Give characteristics of study participants (eg demographic, clinical, social) and information on exposures and potential confounders<br/>We gave the basic characteristics in Table 1 and Figure 1.</p> <p>(b) Indicate number of participants with missing data for each variable of interest<br/>In this study, no information is available suggesting potential missing variables and we could not show the number of subjects with missing data.</p>                                                                                                                                                                                                                                                                                                                                                                                                                                                                                                                                                                                                                  |
| Outcome data        | 15* | Report numbers of outcome events or summary measures<br>Though this study is descriptive, comorbidity may be regarded as one of “outcomes” and the number is summarized in Table 4.                                                                                                                                                                                                                                                                                                                                                                                                                                                                                                                                                                                                                                                                                                                                                                                                                                                                                              |
| Main results        | 16  | <p>(a) Give unadjusted estimates and, if applicable, confounder-adjusted estimates and their precision (eg, 95% confidence interval). Make clear which confounders were adjusted for and why they were included<br/>Estimates of the proportion are given with 95% confidence interval. As “confounding” is not an issue in this study, no data after “adjustment” is shown though we showed results when stratified by the specialty of the department and other variables used to make subclasses.</p> <p>(b) Report category boundaries when continuous variables were categorized<br/>This occurred for age which was given as 5-year age band and the boundaries are clearly given in the manuscript.</p> <p>(c) If relevant, consider translating estimates of relative risk into absolute risk for a meaningful time period</p>                                                                                                                                                                                                                                           |

In this descriptive study, this issue of relative/absolute risk is not relevant.

---

|                |    |                                                                                                                                                                                                                                                                                                            |
|----------------|----|------------------------------------------------------------------------------------------------------------------------------------------------------------------------------------------------------------------------------------------------------------------------------------------------------------|
| Other analyses | 17 | Report other analyses done—eg analyses of subgroups and interactions, and sensitivity analyses<br>In supplementary tables, the results in subgroups subdivided by the specialty of the department with or without further stratification by the additional variable (e.g., severity of disease) are shown. |
|----------------|----|------------------------------------------------------------------------------------------------------------------------------------------------------------------------------------------------------------------------------------------------------------------------------------------------------------|

---

**Discussion**

---

|                  |    |                                                                                                                                                                                                                                                                                                                                   |
|------------------|----|-----------------------------------------------------------------------------------------------------------------------------------------------------------------------------------------------------------------------------------------------------------------------------------------------------------------------------------|
| Key results      | 18 | Summarise key results with reference to study objectives<br>Main result or prevalence of psoriasis/PPP is summarized.                                                                                                                                                                                                             |
| Limitations      | 19 | Discuss limitations of the study, taking into account sources of potential bias or imprecision. Discuss both direction and magnitude of any potential bias<br>Main limitation due to the lack of validation study is emphasized.                                                                                                  |
| Interpretation   | 20 | Give a cautious overall interpretation of results considering objectives, limitations, multiplicity of analyses, results from similar studies, and other relevant evidence<br>Interpretation is made cautiously particularly we recognize that the study has limitations. Comparison with other studies so far conducted is made. |
| Generalisability | 21 | Discuss the generalisability (external validity) of the study results<br>As the study used the data covering whole nation, generalizability is not an issue.                                                                                                                                                                      |

---

**Other information**

---

|         |    |                                                                                                                                                                                                                                                                                         |
|---------|----|-----------------------------------------------------------------------------------------------------------------------------------------------------------------------------------------------------------------------------------------------------------------------------------------|
| Funding | 22 | Give the source of funding and the role of the funders for the present study and, if applicable, for the original study on which the present article is based<br>The source of funding and the role of the funders is clearly given in the section of “Funding” given after REFERENCES. |
|---------|----|-----------------------------------------------------------------------------------------------------------------------------------------------------------------------------------------------------------------------------------------------------------------------------------------|

---

\*Give information separately for exposed and unexposed groups.

**Note:** An Explanation and Elaboration article discusses each checklist item and gives methodological background and published examples of transparent reporting. The STROBE checklist is best used in conjunction with this article (freely available on the Web sites of PLoS Medicine at <http://www.plosmedicine.org/>, Annals of Internal Medicine at <http://www.annals.org/>, and Epidemiology at <http://www.epidem.com/>). Information on the STROBE Initiative is available at [www.strobe-statement.org](http://www.strobe-statement.org).
